# Supplementary material
Source: publisher figshare collection journal article supplement (https://tandf.figshare.com/articles/dataset/_/9890444)
Supplement: Supplementary file 1 [file 3]

## Sheet: info
Supplementary table 2- SNP information
sheet 1:	all SNPs
Sheet 2:	SNPs in PtxP3
sheet 3:	SNPS in Prn9
Sheet 4:	SNPs distribution as finctional categories

## Sheet: SNP data
																	Reference	ptxA2/prn1		ptxA1/prn1	ptxp3/fim3-1	Clade1						Calde 2		unclade	Clade3		Calde 4		Clade 5 (Prn9)								Clade 6					Clade 7
Site	Base Mutation	isAACalculated	AA_original	AA_SNP	codon_orig	codon_snp	locus_tag		gene_name	function	location	Immunologic	strand	isAAsame	strains	reported previously	Tohama I	IR136	IR138	IR146	IR145	IR81	IR80	IR154	IR15	IR61	IR49	IR112	IR147	IR87	IR90	IR62	IR121	IR122	IR70	IR91	IR123	IR149	IR128	IR164	IR155	IR129	IR141	IR127	IR131	IR89	IR58	IR82	IR43
10764	T->C	Yes					BP0013	525				Yes		Yes	Tohama	Yes	T	C	C	C	C	C	C	C	C	C	C	C	C	C	C	C	C	C	C	C	C	C	C	C	C	C	C	C	C	C	C	C	C
20055	G->T	No|intergenic					BP0018P								Clade 4	No	G	G	G	G	G	G	G	G	G	G	G	G	G	G	G	G	T	T	G	G	G	G	G	G	G	G	G	G	G	G	G	G	G
21196	T->C	Yes	V	A	GTC	GCC	BP0018	1176	-	putative membrane protein	20772..21947		+	No	146	No	T	T	T	C	T	T	T	T	T	T	T	T	T	T	T	T	T	T	T	T	T	T	T	T	T	T	T	T	T	T	T	T	T
30440	C->T	Yes	W	STOP	TGG	TGA	BP0027	498	-	MaoC family protein	complement(30365..30862)		-	No	124	No	C	C	C	C	C	C	C	C	C	C	C	C	C	C	C	C	C	C	C	C	C	C	C	C	C	C	C	C	C	C	C	C	C
36857	A->G	No|intergenic					BP0032P / BP0033P		- / glyQP						145-end	Yes	A	A	A	A	G	G	G	G	G	G	G	G	G	G	G	G	G	G	G	G	G	G	G	G	G	G	G	G	G	G	G	G	G
37390	A->G	Yes	L	L	CTA	CTG	BP0033	912	glyQ	glycyl-tRNA synthetase alpha chain	37013..37924		+	Yes	Tohama I	Yes	A	G	G	G	G	G	G	G	G	G	G	G	G	G	G	G	G	G	G	G	G	G	G	G	G	G	G	G	G	G	G	G	G
42578	A->G	Yes	E	G	GAG	GGG	BP0038	396	gloA	lactoylglutathione lyase	42283..42678		+	No	Tohama I	Yes	A	G	G	G	G	G	G	G	G	G	G	G	G	G	G	G	G	G	G	G	G	G	G	G	G	G	G	G	G	G	G	G	G
45424	C->T	Yes	A	V	GCG	GTG	BP0043	549	-	putative exported protein	45201..45749		+	No	Clade 4	No	C	C	C	C	C	C	C	C	C	C	C	C	C	C	C	C	T	T	C	C	C	C	C	C	C	C	C	C	C	C	C	C	C
45431	C->T	Yes	V	V	GTC	GTT	BP0043		-	putative exported protein	45201..45749		+	Yes	43	No	C	C	C	C	C	C	C	C	C	C	C	C	C	C	C	C	C	C	C	C	C	C	C	C	C	C	C	C	C	C	C	C	T
48612	C->T	Yes	A	A	GCC	GCT	BP0047	1248	metX	homoserine-ortho-acyltransferase	48148..49395		+	Yes	33-104	No	C	C	C	C	C	C	C	C	C	C	C	C	C	C	C	C	C	C	C	C	C	C	C	C	C	C	C	C	C	C	C	C	C
50044	C->G	No|intergenic					BP0049P								145-end	Yes	C	C	C	C	G	G	G	G	G	G	G	G	G	G	G	G	G	G	G	G	G	G	G	G	G	G	G	G	G	G	G	G	G
50111	C->A	No|intergenic					BP0049P								multiple	Yes	C	N	N	N	N	A	N	N	N	N	A	A	N	N	N	N	C	C	N	N	N	A	N	N	A	A	N	N	A	A	N	N	A
50114	C->T	No|intergenic					BP0049P								81	No	C	C	C	C	C	T	N	C	C	C	C	C	C	C	C	C	C	C	C	C	C	C	C	C	C	C	C	C	C	C	C	C	C
52491	A->G	No|intergenic					BP0051P								Tohama I	Yes	A	G	G	G	G	G	G	G	G	G	G	G	G	G	G	G	G	G	G	G	G	G	G	G	G	G	G	G	G	G	G	G	G
53051	G->A	Yes					BP0051	1063		outer membrane porin protein precursor (Pseudogene)					101	No	G	G	G	G	G	G	G	G	G	G	G	G	G	G	G	G	G	G	G	G	G	G	G	G	G	G	G	G	G	G	G	G	G
57391	G->T	Yes	T	K	ACG	AAG	BP0057	900	-	amino-acid ABC transporter binding protein precursor	complement(56505..57404)		-	No	146	Yes	G	G	G	T	G	G	G	G	G	G	G	G	G	G	G	G	G	G	G	G	G	G	G	G	G	G	G	G	G	G	G	G	G
68531	G->A	Yes	S	L	TCG	TTG	BP0069	1182	-	putative exported protein	complement(67483..68664)		-	No	89	No	G	G	G	G	G	G	G	G	G	G	G	G	G	G	G	G	G	G	G	G	G	G	G	G	G	G	G	G	G	A	G	G	G
69055	C->A	No|intergenic					BP0070P								clade 5	Yes	C	C	C	N	C	C	C	C	C	C	C	C	C	C	C	C	C	C	A	N	N	N	N	N	A	A	C	C	C	C	C	C	C
80040	T->G	Yes	H	P	CAC	CCC	BP0082	1871	bplL	lipopolysaccharide biosynthesis protein	complement(79601..81475)		-	No	136-138	No	T	G	G	T	T	T	T	T	T	T	T	T	T	T	T	T	T	T	T	T	T	T	T	T	T	T	T	T	T	T	T	T	T
83902	G->A	Yes	R	R	CGC	CGT	BP0086	1173	bplH	putative glycosyl transferase	complement(83524..84696)		-	Yes	89	No	G	G	G	G	G	G	G	G	G	G	G	G	G	G	G	G	G	G	G	G	G	G	G	G	G	G	G	G	G	A	G	G	G
85854	G->A	Yes	D	D	GAC	GAT	BP0088	1233	bplF	lipopolysaccharide biosynthesis protein	complement(85482..86714)		-	Yes	82	No	G	G	G	G	G	G	G	G	G	G	G	G	G	G	G	G	G	G	G	G	G	G	G	G	G	G	G	G	G	G	G	A	G
99128	C->T	Yes	A	V	GCC	GTC	BP0101A	603	-	putative exported protein	99112..99714		+	No	89-58	No	C	C	C	C	C	C	C	C	C	C	C	C	C	C	C	C	C	C	C	C	C	C	C	C	C	C	C	C	C	T	T	C	C
100415	C->T	No|intergenic					BP0102P								49	Yes	C	C	C	C	C	C	C	C	C	C	T	C	C	C	C	C	C	C	C	C	C	C	C	C	C	C	C	C	C	C	C	C	C
108923	T->C	Yes	R	G			BP0111	624		putative membrane protein (pseudogene)					Tohama I	Yes	T	C	C	C	C	C	C	C	C	C	C	C	C	C	C	C	C	C	C	C	C	C	C	C	C	C	C	C	C	C	C	C	C
115891	T->A	Yes	L	Q	CTG	CAG	BP0118	1017	-	transposase for IS1663	114945..115961		+	No	multiple	Yes	T	T	T	T	N	A	N	A	N	A	A	A	A	N	A	A	A	A	A	A	A	A	A	A	N	A	N	A	N	N	A	A	N
121155	C->T	Yes	D	N	GAC	AAC	BP0124	951	-	transposase	complement(121123..122073)		-	No	147	No	C	C	C	C	C	C	C	C	C	C	C	N	T	C	C	C	C	C	C	C	C	C	C	C	C	C	C	C	C	C	C	C	C
122105	C->T	No|intergenic					BP0124P								101	Yes	C	N	N	N	C	N	N	N	N	N	N	N	N	N	N	N	N	N	N	N	N	N	N	N	N	N	N	N	N	N	N	N	N
128953	C->T	Yes	A	T	GCC	ACC	BP0131	1701	leuA	2-isopropylmalate synthase	complement(128378..130078)		-	No	141-127	No	C	C	C	C	C	C	C	C	C	C	C	C	C	C	C	C	C	C	C	C	C	C	C	C	C	C	T	T	C	C	C	C	C
138223	C->T	Yes					BP0140	537		conserved hypothetical protein (pseudogene)					2	No	C	C	C	C	C	C	C	C	C	C	C	C	C	C	C	C	C	C	C	C	C	C	C	C	C	C	C	C	C	C	C	C	C
149727	C->T	Yes	S	L	TCG	TTG	BP0149	783	-	probable transcriptional regulator	149027..149809		+	No	98-130	No	C	C	C	C	C	C	C	C	C	C	C	C	C	C	C	C	C	C	C	C	C	C	C	C	C	C	C	C	C	C	C	C	C
170017	G->A	Yes	L	L	CTG	CTA	BP0170	1431	rhlE	putative ATP-dependent RNA helicase	169079..170509		+	Yes	clade 5	Yes	G	G	G	G	G	G	G	G	G	G	G	G	G	G	G	G	G	G	A	A	A	A	A	A	A	A	G	G	G	G	G	G	G
170139	A->G	Yes	D	G	GAC	GGC	BP0170		rhlE	putative ATP-dependent RNA helicase	169079..170509		+	No	Clade 2	No	A	A	A	A	A	A	A	A	A	A	A	G	G	A	A	A	A	A	A	A	A	A	A	A	A	A	A	A	A	A	A	A	A
174270	C->A	No|intergenic					BP0174/BP0175P		bfr/-P						multiple	Yes	C	N	N	N	A	N	N	N	N	N	N	N	N	N	N	N	N	N	N	N	A	N	N	N	N	N	N	A	N	N	N	N	N
174273	C->T	No|intergenic					BP0174/BP0175P		bfr/-P						101	Yes	C	N	N	N	N	N	N	N	N	N	N	N	N	N	N	N	N	N	N	N	N	N	N	N	N	N	N	N	N	N	N	N	N
182366	G->C	Yes	G	A	GGC	GCC	BP0182	1089	-	putative iron sulfur binding protein	181333..182421		+	No	Tohama I	Yes	G	C	C	C	C	C	C	C	C	C	C	C	C	C	C	C	C	C	C	C	C	C	C	C	C	C	C	C	C	C	C	C	C
185405	G->A	Yes	Q	Q	CAG	CAA	BP0184	3699	-	putative exported protein	184326..188024		+	Yes	145-end	Yes	G	G	G	G	A	A	A	A	A	A	A	A	A	A	A	A	A	A	A	A	A	A	A	A	A	A	A	A	A	A	A	A	A
193157	C->T	Yes	A	A	GCC	GCT	BP0191	1229	-	putative exported protein	193098..194330		+	Yes	Tohama I	Yes	C	T	T	T	T	T	T	T	T	T	T	T	T	T	T	T	T	T	T	T	T	T	T	T	T	T	T	T	T	T	T	T	T
196307	T->C	Yes	V	A	GTG	GCG	BP0194	894	-	probable metal transporter	196114..197007		+	No	145-end	Yes	T	T	T	T	C	C	C	C	C	C	C	C	C	C	C	C	C	C	C	C	C	C	C	C	C	C	C	C	C	C	C	C	C
205628	C->A	No|intergenic					BP0202P								154	Yes	C	C	C	C	C	C	C	A	C	C	C	C	C	C	C	C	C	C	C	C	N	N	C	C	C	C	C	C	C	C	C	C	C
207710	G->T	No|intergenic					BP0203P								82	No	G	G	G	G	G	G	G	G	G	G	G	G	G	G	G	G	G	G	G	G	G	G	G	G	G	G	G	G	G	G	G	T	G
213387	C->T	Yes	G	D	GGC	GAC	BP0208	1413	-	putative oxidoreductase	complement(213269..214681)		-	No	98-130	No	C	C	C	C	C	C	C	C	C	C	C	C	C	C	C	C	C	C	C	C	C	C	C	C	C	C	C	C	C	C	C	C	C
214663	A->G	Yes	S	P	TCG	CCG	BP0208		-	putative oxidoreductase	complement(213269..214681)		-	No	Tohama I	Yes	A	G	G	G	G	G	G	G	G	G	G	G	G	G	G	G	G	G	G	G	G	G	G	G	G	G	G	G	G	G	G	G	G
215580	G->A	No|intergenic					BP0210P								122-147-end	Yes	G	N	N	G	G	G	G	G	N	G	G	N	A	N	G	G	N	A	G	G	G	G	G	G	G	G	G	G	G	G	G	G	G
215582	T->C	No|intergenic					BP0210P								multiple	Yes	T	N	N	T	T	C	C	T	N	T	C	N	C	N	T	N	N	C	T	N	N	T	T	T	T	T	T	T	T	T	T	T	T
215584	C->T	No|intergenic					BP0210P								multiple	Yes	C	C	C	C	C	C	C	C	C	C	C	N	T	N	C	C	N	T	C	C	C	C	C	C	C	C	C	C	C	C	C	C	C
220408	C->T	Yes	A	V	GCG	GTG	BP0215	2943	ppc	phosphoenolpyruvate carboxylase	220068..223010		+	No	90	No	C	C	C	C	C	C	C	C	C	C	C	C	C	C	T	C	C	C	C	C	C	C	C	C	C	C	C	C	C	C	C	C	C
220937	G->A	Yes	L	L	CTG	CTA	BP0215		ppc	phosphoenolpyruvate carboxylase	220068..223010		+	Yes	145-end	Yes	G	G	G	G	A	A	A	A	A	A	A	A	A	A	A	A	A	A	A	A	A	A	A	A	A	A	A	A	A	A	A	A	A
223130	C->T	No|intergenic					INTERGENIC								101	No	C	C	C	C	C	C	C	C	C	C	C	C	C	C	C	C	C	C	C	C	C	C	C	C	C	C	C	C	C	C	C	C	C
223961	G->A	Yes	V	I	GTA	ATA	BP0216	2799	sphB1	autotransporter subtilisin-like protease	223601..226399	Yes	+	No	145	Yes	G	G	G	G	A	G	G	G	G	G	G	G	G	G	G	G	G	G	G	G	G	G	G	G	G	G	G	G	G	G	G	G	G
224066	G->A	Yes	A	T	GCC	ACC	BP0216		sphB1	autotransporter subtilisin-like protease	223601..226399	Yes	+	No	87	Yes	G	G	G	G	G	G	G	G	G	G	G	G	G	A	G	G	G	G	G	G	G	G	G	G	G	G	G	G	G	G	G	G	G
232327	G->A	Yes	Q	Q	CAG	CAA	BP0222	645	catJ	3-oxoadipate CoA-transferase subunit B	231725..232369		+	Yes	136-138	No	G	A	A	G	G	G	G	G	G	G	G	G	G	G	G	G	G	G	G	G	G	G	G	G	G	G	G	G	G	G	G	G	G
240862	G->A	Yes	R	C	CGC	TGC	BP0234	1044	-	putative solute-binding periplasmic protein	complement(240494..241537)		-	No	146	Yes	G	G	G	A	G	G	G	G	G	G	G	G	G	G	G	G	G	G	G	G	G	G	G	G	G	G	G	G	G	G	G	G	G
262095	C->T	Yes	V	V	GTC	GTT	BP0252	1755	ggt	gamma-glutamyltranspeptidase	261121..262875		+	Yes	15	No	C	C	C	C	C	C	C	C	T	C	C	C	C	C	C	C	C	C	C	C	C	C	C	C	C	C	C	C	C	C	C	C	C
266651	A->G	Yes	D	G	GAC	GGC	BP0256	951	-	transposase	265732..266682		+	No	82	No	A	A	A	A	A	A	A	A	A	A	A	A	A	A	A	A	A	A	A	A	A	A	A	A	A	A	A	A	A	A	A	G	A
285033	T->C	Yes	I	T	ATC	ACC	BP0280	1137	degQ	protease	284999..286135		+	No	Tohama I	Yes	T	C	C	C	C	C	C	C	C	C	C	C	C	C	C	C	C	C	C	C	C	C	C	C	C	C	C	C	C	C	C	C	C
291250	G->A	Yes	P	S	CCG	TCG	BP0285	1005	-	putative acetyl esterase	complement(290348..291352)		-	No	80-81	No	G	G	G	G	G	A	A	G	G	G	G	G	G	G	G	G	G	G	G	G	G	G	G	G	G	G	G	G	G	G	G	G	G
294345	G->A	No|intergenic					BP0289P		ilvDP						33-104	No	G	G	G	G	G	G	G	G	G	G	G	G	G	G	G	G	G	G	G	G	G	G	G	G	G	G	G	G	G	G	G	G	G
299559	C->T	Yes	A	T			BP0292	1349		conserved hypothetical protein (Pseudogene)				No	145-end	Yes	C	C	C	C	T	T	T	T	T	T	T	T	T	T	T	T	T	T	T	T	T	T	T	T	T	T	T	T	T	T	T	T	T
333025	G->A	Yes	P	P	CCC	CCT	BP0329	1680	-	putative coenzyme A ligase	complement(331861..333540)		-	Yes	80-154	No	G	G	G	G	G	A	A	A	G	G	G	G	G	G	G	G	G	G	G	G	G	G	G	G	G	G	G	G	G	G	G	G	G
338241	G->T	No|intergenic					BP0335P								161	No	G	G	G	G	G	G	G	G	G	G	G	G	G	G	G	G	G	G	G	G	G	G	G	G	G	G	G	G	G	G	G	G	G
340110	C->T	Yes	H	Y	CAC	TAC	BP0337	831	-	putative exported protein	339852..340682		+	No	85	No	C	C	C	C	C	C	C	C	C	C	C	C	C	C	C	C	C	C	C	C	C	C	C	C	C	C	C	C	C	C	C	C	C
345945	C->T	Yes	A	T	GCG	ACG	BP0344	936	bhuU	putative hemin permease	complement(345373..346308)		-	No	2-end	No	C	C	C	C	C	C	C	C	C	C	C	C	C	C	C	C	C	C	C	C	C	C	C	C	C	C	C	C	C	C	C	C	C
357950	T->C	Yes	V	A	GTG	GCG	BP0358	1509	-	putative membrane protein	357934..359442		+	No	155-129	No	T	T	T	T	T	T	T	T	T	T	T	T	T	T	T	T	T	T	T	T	T	T	T	T	C	C	T	T	T	T	T	T	T
359529	C->T	No|intergenic					BP0359p			hypothetical protein					clade 5	No	C	C	C	C	C	C	C	C	C	C	C	C	C	C	C	C	C	C	T	T	T	T	T	T	T	T	C	C	C	C	C	C	C
365493	C->T	Yes	E	K	GAA	AAA	BP0365	951	-	transposase	complement(365464..366414)		-	No	62	No	C	C	C	C	C	C	C	C	C	C	C	C	C	C	C	T	C	C	C	C	C	C	C	C	C	C	C	C	C	C	C	C	C
372931	A->G	Yes	L	L	TTG	CTG	BP0371	1455	gatB	glutamyl-tRNA(GLN) amidotransferase subunit B	complement(371618..373072)		-	Yes	Tohama I	Yes	A	G	G	G	G	G	G	G	G	G	G	G	G	G	G	G	G	G	G	G	G	G	G	G	G	G	G	G	G	G	G	G	G
375056	A->G	No|intergenic					BP0373/BP0374P		gatC/mreBp						147	No	A	A	A	A	A	A	A	A	A	A	A	A	G	A	A	A	A	A	A	A	A	A	A	A	A	A	A	A	A	A	A	A	A
377646	C->T	Yes	A	A	GCC	GCT	BP0376	465	mreD	rod shape-determining protein	377257..377721		+	Yes	Clade 1	Yes	C	C	C	C	C	T	T	T	T	T	T	C	C	C	C	C	C	C	C	C	C	C	C	C	C	C	C	C	C	C	C	C	C
399748	A->C	No|intergenic					BP0401P								81	No	A	A	A	N	A	C	N	A	A	A	A	A	A	A	A	A	A	A	A	A	A	A	A	A	A	A	A	A	A	A	A	A	A
405322	G->C	Yes	P	A	CCC	GCC	BP0405	180	-	putative membrane protein	complement(405185..405364)		-	No	Tohama I	Yes	G	C	C	C	C	C	C	C	C	C	C	C	C	C	C	C	C	C	C	C	C	C	C	C	C	C	C	C	C	C	C	C	C
417496	A->C	Yes	D	A	GAC	GCC	BP0416	1233	-	Conserved hypothetical protein	416616..417848		+	No	Tohama I	Yes	A	C	C	C	C	C	C	C	C	C	C	C	C	C	C	C	C	C	C	C	C	C	C	C	C	C	C	C	C	C	C	C	C
426075	C->T	Yes	E	K	GAA	AAA	BP0424	951	-	transposase	complement(426046..426996)		-	No	161	No	C	C	C	C	C	C	C	C	C	C	C	C	C	C	C	C	C	C	C	C	C	C	C	C	C	C	C	C	C	C	C	C	C
427027	T->G	No|intergenic					BP0424P								multiple	Yes	T	N	N	G	N	N	N	N	N	N	N	N	N	N	N	T	N	N	N	N	N	G	N	N	N	N	N	N	N	N	N	N	G
427860	C->T	Yes	L	L	CTG	CTA	BP0425	906	-	probable LysR-family transcriptional regulator	complement(427095..428000)		-	Yes	Clade 6	No	C	C	C	C	C	C	C	C	C	C	C	C	C	C	C	C	C	C	C	C	C	C	C	C	C	C	T	T	T	T	T	C	C
440611	A->G	Yes	V	A	GTC	GCC	BP0436	495	-	Conserved hypothetical protein	complement(440544..441038)		-	No	98-130	No	A	A	A	A	A	A	A	A	A	A	A	A	A	A	A	A	A	A	A	A	A	A	A	A	A	A	A	A	A	A	A	A	A
443453	G->A	No|intergenic					BP0438/BP0439P								multiple	Yes	G	N	N	N	N	N	N	N	N	N	A	N	A	N	A	N	N	N	N	N	N	N	N	N	N	N	G	G	N	N	A	N	N
444406	G->A	Yes	E	K	GAA	AAA	BP0439	951	-	transposase	443485..444435		+	No	62	Yes	G	G	G	G	G	G	G	G	G	G	G	G	G	G	G	A	G	G	G	G	G	G	G	G	G	G	G	G	G	G	G	G	G
444764	T->C	Yes	S	G			BP0440	341		N-terminal region of a probable acyl-CoA dehydrogenase (Pseudogene)				No	Tohama I	Yes	T	C	C	C	C	C	C	C	C	C	C	C	C	C	C	C	C	C	C	C	C	C	C	C	C	C	C	C	C	C	C	C	C
447501	G->A	No|intergenic					BP0443/BP0444P								70	Yes	G	N	N	N	N	N	N	N	N	N	N	N	N	N	N	N	N	N	A	N	N	N	N	N	N	N	N	N	N	N	N	N	N
447502	G->T	No|intergenic					BP0443/BP0444P								70	Yes	G	N	N	N	N	N	N	N	N	N	N	N	N	N	N	N	N	N	T	N	N	N	N	N	N	N	N	N	N	N	N	N	N
447503	T->C	No|intergenic					BP0443/BP0444P								multiple	Yes	T	N	N	N	N	N	N	N	N	N	N	N	N	N	N	N	N	N	C	N	N	N	N	N	N	N	N	C	N	N	N	N	C
459703	G->A	Yes	T	T	ACG	ACA	BP0454	963	-	putative exported protein	459311..460273		+	Yes	136-138	No	G	A	A	G	G	G	G	G	G	G	G	G	G	G	G	G	G	G	G	G	G	G	G	G	G	G	G	G	G	G	G	G	G
468345	A->G	Yes	V	A	GTC	GCC	BP0459	2622	-	putative membrane protein	complement(466526..469147)		-	No	82	No	A	A	A	A	A	A	A	A	A	A	A	A	A	A	A	A	A	A	A	A	A	A	A	A	A	A	A	A	A	A	A	G	A
469067	C->T	Yes	L	L	CTG	CTA	BP0459		-	putative membrane protein	complement(466526..469147)		-	Yes	146	No	C	C	C	T	C	C	C	C	C	C	C	C	C	C	C	C	C	C	C	C	C	C	C	C	C	C	C	C	C	C	C	C	C
470332	G->A	Yes	K	K	AAG	AAA	BP0460	2628	topB	DNA topoisomerase iii	469211..471838		+	Yes	146	Yes	G	G	G	A	G	G	G	G	G	G	G	G	G	G	G	G	G	G	G	G	G	G	G	G	G	G	G	G	G	G	G	G	G
479535	G->A	Yes	D	D	GAC	GAT	BP0467	1851	-	acetolactate synthase	complement(477807..479657)		-	Yes	Tohama I	Yes	G	A	A	A	A	A	A	A	A	A	A	A	A	A	A	A	A	A	A	A	A	A	A	A	A	A	A	A	A	A	A	A	A
486005	G->A	Yes	P	L	CCT	CTT	BP0475	3129	ams	ribonuclease E	complement(485356..488484)		-	No	Tohama I	Yes	G	A	A	A	A	A	A	A	A	A	A	A	A	A	A	A	A	A	A	A	A	A	A	A	A	A	A	A	A	A	A	A	A
506892	C->T	Yes	H	H	CAC	CAT	BP0493	372	rnpA	ribonuclease P protein component	506608..506979		+	Yes	146	No	C	C	C	T	C	C	C	C	C	C	C	C	C	C	C	C	C	C	C	C	C	C	C	C	C	C	C	C	C	C	C	C	C
507934	C->T	Yes	P	L	CCG	CTG	BP0495	1692	-	probable inner-membrane protein	507297..508988	Yes	+	No	49	No	C	C	C	C	C	C	C	C	C	C	T	C	C	C	C	C	C	C	C	C	C	C	C	C	C	C	C	C	C	C	C	C	C
511992	A->G	No|intergenic					BP0499P/BP0500P		btcAP / bteAP						145-end	Yes	A	A	A	A	G	G	G	G	G	G	G	G	G	G	G	G	G	G	G	G	G	G	G	G	G	G	G	G	G	G	G	G	G
513355	G->A	Yes	S	N	AGC	AAC	BP0500	1971	bteA	hypothetical protein	512199..514169	Yes	+	No	147	No	G	G	G	G	A	G	G	G	G	G	G	G	G	G	G	G	G	G	G	G	G	G	G	G	G	G	G	G	G	G	G	G	G
514085	C->T	Yes	G	G	GGC	GGT	BP0500		-	hypothetical protein	512199..514169	Yes	+	Yes	49	No	C	C	C	C	C	C	C	C	C	C	T	C	C	C	C	C	C	C	C	C	C	C	C	C	C	C	C	C	C	C	C	C	C
514171	G->A	No|intergenic					INTERGENIC								145-end	Yes	G	G	G	G	A	A	A	A	A	A	A	A	A	A	A	A	A	A	A	A	A	A	A	A	A	A	A	A	A	A	A	A	A
517207	G->T	Yes	A	A	GCC	GCA	BP0505	342	-	phage-related protein	complement(516955..517296)		-	Yes	145-end	Yes	G	G	G	G	T	T	T	T	T	T	T	T	T	T	T	T	T	T	T	T	T	T	T	T	T	T	T	T	T	T	T	T	T
518837	T->C	Yes	E	E	GAA	GAG	BP0507	528	-	hypothetical protein	complement(518528..519055)		-	Yes	145-end	Yes	T	T	T	T	C	C	C	C	C	C	C	C	C	C	C	C	C	C	C	C	C	C	C	C	C	C	C	C	C	C	C	C	C
522138	A->G	Yes	Y	H	TAC	CAC	BP0514	951	-	transposase	complement(522040..522990)		-	No	152	Yes	A	A	A	A	A	A	A	A	A	A	A	A	A	A	A	A	A	A	A	A	A	A	A	A	A	A	A	A	A	A	A	A	A
524248	A->G	Yes	Y	H	TAC	CAC	BP0517	951	-	transposase	complement(524150..525100)		-	No	146-end	Yes	A	A	A	G	N	N	N	N	N	N	N	N	N	N	N	N	N	N	G	N	N	N	N	N	N	N	N	N	N	N	N	N	G
525132	T->C	No|intergenic					BP0517P								154	Yes	T	N	N	C	N	C	N	T	N	N	N	N	N	N	N	C	N	C	N	N	N	N	N	N	C	N	N	N	N	N	N	N	C
525420	G->C	Yes	D	E	GAC	GAG	BP0518	396	-	Conserved hypothetical protein	complement(525210..525605)		-	No	145-end	Yes	G	G	G	G	C	C	C	C	C	C	C	C	C	C	C	C	C	C	C	C	C	C	C	C	C	C	C	C	C	C	C	C	C
552809	C->T	Yes	R	H	CGC	CAC	BP0543	1290	-	Conserved hypothetical protein	complement(551539..552828)		-	No	89	No	C	C	C	C	C	C	C	C	C	C	C	C	C	C	C	C	C	C	C	C	C	C	C	C	C	C	C	C	C	T	C	C	C
560519	C->T	Yes	V	V	GTG	GTA	BP0553	1251	-	Conserved hypothetical protein	complement(559631..560881)		-	Yes	Tohama I	Yes	C	T	T	T	T	T	T	T	T	T	T	T	T	T	T	T	T	T	T	T	T	T	T	T	T	T	T	T	T	T	T	T	T
560753	T->C	Yes	G	G	GGA	GGG	BP0553		-	Conserved hypothetical protein	complement(559631..560881)		-	Yes	Tohama I	Yes	T	C	C	C	C	C	C	C	C	C	C	C	C	C	C	C	C	C	C	C	C	C	C	C	C	C	C	C	C	C	C	C	C
578774	G->A	Yes	Q	Q	CAG	CAA	BP0571	2310	-	putative two-component sensor kinase	576744..579053		+	Yes	36-124	No	G	G	G	G	G	G	G	G	G	G	G	G	G	G	G	G	G	G	G	G	G	G	G	G	G	G	G	G	G	G	G	G	G
617347	C->T	Yes	G	G	GGC	GGT	BP0612	972	-	putative exported protein	617222..618193		+	Yes	Clade8	Yes	C	C	C	C	C	C	C	C	C	C	C	C	C	C	C	C	C	C	C	C	C	C	C	C	C	C	C	C	C	C	C	C	C
639322	G->A	Yes					BP0631	628		putative enoyl-CoA hydratase/isomerase (Pseudogene)					61	No	G	G	G	G	G	G	G	G	G	A	G	G	G	G	G	G	G	G	G	G	G	G	G	G	G	G	G	G	G	G	G	G	G
654224	G->A	Yes	E	K	GAA	AAA	BP0646	951	-	transposase	653303..654253		+	No	fim3-2	Yes	G	G	G	G	G	A	A	A	A	A	A	A	A	A	A	A	A	A	A	A	A	A	A	A	A	A	A	A	A	A	A	A	A
654523	G->A	Yes	S	S	AGC	AGT	BP0647	408	-	Conserved hypothetical protein	complement(654250..654657)		-	Yes	145	No	G	G	G	G	A	G	G	G	G	G	G	G	G	G	G	G	G	G	G	G	G	G	G	G	G	G	G	G	G	G	G	G	G
659845	T->A	No|intergenic					INTERGENIC								80-154	No	T	T	T	T	T	A	A	A	T	T	T	T	T	T	T	T	T	T	T	T	T	T	T	T	T	T	T	T	T	T	T	T	T
662740	T->C	Yes	S	S	TCA	TCG	BP0654	1020	-	putative exported protein	complement(662380..663399)		-	Yes	Tohama I	Yes	T	C	C	C	C	C	C	C	C	C	C	C	C	C	C	C	C	C	C	C	C	C	C	C	C	C	C	C	C	C	C	C	C
667028	G->A	Yes	Q	STOP	CAG	TAG	BP0658	1275	-	putative flavin-binding monooxygenase	complement(665841..667115)		-	No	145	Yes	G	G	G	G	A	G	G	G	G	G	G	G	G	G	G	G	G	G	G	G	G	G	G	G	G	G	G	G	G	G	G	G	G
679696	C->T	Yes	E	E	GAG	GAA	BP0668	1185	-	probable thiolase	complement(678661..679845)		-	Yes	Clade 2	No	C	C	C	C	C	C	C	C	C	C	C	T	T	C	C	C	C	C	C	C	C	C	C	C	C	C	C	C	C	C	C	C	C
688781	C->T	Yes	G	G	GGC	GGT	BP0674	837	-	probable transcriptional regulator	688152..688988		+	Yes	154	No	C	C	C	C	C	C	C	T	C	C	C	C	C	C	C	C	C	C	C	C	C	C	C	C	C	C	C	C	C	C	C	C	C
691452	T->C	No|intergenic					BP0676P								Tohama I	Yes	T	C	C	N	N	C	N	N	N	N	C	N	N	N	N	N	N	N	N	N	N	N	N	C	N	N	N	N	N	N	N	C	C
694521	A->G	Yes	K	K	AAA	AAG	BP0678	1083	prfA	peptide chain release factor 1	694516..695598		+	Yes	145-end	Yes	A	A	A	A	G	G	G	G	G	G	G	G	G	G	G	G	G	G	G	G	G	G	G	G	G	G	G	G	G	G	G	G	G
700292	G->T	Yes	SILENT				BP0684	871		molybdopterin dehydrogenase (Pseudogene)				Yes	146-end	Yes	G	G	G	T	T	T	T	T	T	T	T	T	T	T	T	T	T	T	T	T	T	T	T	T	T	T	T	T	T	T	T	T	T
703643	A->G	Yes					BP0686	723		conserved hypothetical protein (Pseudogene)					15	No	A	A	A	A	A	A	A	A	G	A	A	A	A	A	A	A	A	A	A	A	A	A	A	A	A	A	A	A	A	A	A	A	A
713901	A->C	Yes	P	P	CCT	CCG	BP0700	609	-	probable hydrolase	complement(713703..714311)		-	Yes	Tohama I	Yes	A	C	C	C	C	C	C	C	C	C	C	C	C	C	C	C	C	C	C	C	C	C	C	C	C	C	C	C	C	C	C	C	C
732305	G->T	No|intergenic					B0718P								85-86	No	G	G	G	G	G	G	G	G	G	G	G	G	G	G	G	G	G	G	G	G	G	G	G	G	G	G	G	G	G	G	G	G	G
733144	C->T	Yes	V	I	GTC	ATC	BP0721	1380	-	probable aminotransferase	complement(732809..734188)		-	No	Tohama I	Yes	C	T	T	T	T	T	T	T	T	T	T	T	T	T	T	T	T	T	T	T	T	T	T	T	T	T	T	T	T	T	T	T	T
737894	A->G	Yes	I	T	ATC	ACC	BP0724	885	-	probable ABC transporter, permease protein	complement(737323..738207)		-	No	136-138	No	A	G	G	A	A	A	A	A	A	A	A	A	A	A	A	A	A	A	A	A	A	A	A	A	A	A	A	A	A	A	A	A	A
743447	G->T	No|intergenic					BP0729P								145	No	G	G	G	G	T	G	G	G	G	G	G	G	G	G	G	G	G	G	G	G	G	G	G	G	G	G	G	G	G	G	G	G	G
761070	T->C	Yes	T	A	ACG	GCG	BP0747	1134	-	probable GTP-binding protein	complement(760282..761415)		-	No	82	No	T	T	T	T	T	T	T	T	T	T	T	T	T	T	T	T	T	T	T	T	T	T	T	T	T	T	T	T	T	T	T	C	T
766638	C->T	Yes	P	S	CCG	TCG	BP0753	2049	hyuA	putative hydantoin utilization protein A	766089..768137		+	No	88-end	No	C	C	C	C	C	C	C	C	C	C	C	C	C	C	C	C	C	C	C	C	C	C	C	C	C	C	C	C	C	C	C	C	C
770840	C->T	Yes	G	G	GGC	GGT	BP0755	1338	-	putative amino acid deaminase	770187..771524		+	Yes	161	No	C	C	C	C	C	C	C	C	C	C	C	C	C	C	C	C	C	C	C	C	C	C	C	C	C	C	C	C	C	C	C	C	C
775758	T->C	No|intergenic					BP0758P		cyaCp						148-130	No	T	T	T	T	T	T	T	T	T	T	T	T	T	T	T	T	T	T	T	T	T	T	T	T	T	T	T	T	T	T	T	T	T
789332	G->A	Yes	V	M	GTG	ATG	BP0767	684	gltK	glutamate/aspartate transport system permease protein	789125..789808		+	No	Clade 3	Yes	G	G	G	G	G	G	G	G	G	G	G	G	G	G	A	A	G	G	G	G	G	G	G	G	G	G	G	G	G	G	G	G	G
791445	C->T	Yes	A	V	GCC	GTC	BP0769	861	-	probable aminotransferase	790598..791458		+	No	Clade8	Yes	C	C	C	C	C	C	C	C	C	C	C	C	C	C	C	C	C	C	C	C	C	C	C	C	C	C	C	C	C	C	C	C	C
802431	G->A	Yes	T	I	ACC	ATC	BP0780	783	-	putative membrane protein	complement(802349..803131)		-	No	145	No	G	G	G	G	A	G	G	G	G	G	G	G	G	G	G	G	G	G	G	G	G	G	G	G	G	G	G	G	G	G	G	G	G
809091	C->G	Yes	S	T	AGC	ACC	BP0786	951	-	transposase	complement(809087..810037)		-	No	multiple	Yes	C	C	C	C	N	N	N	N	G	N	N	N	G	N	N	N	N	N	N	N	N	N	N	N	N	N	N	N	N	N	N	N	N
810780	C->T	No|intergenic					BP0787P								155-164	No	C	C	C	C	C	C	C	C	C	C	C	C	C	C	C	C	C	C	C	C	C	C	C	T	T	T	C	C	C	C	C	C	C
823803	G->T	Yes	A	S	GCC	TCC	BP0800	978	-	probable zinc-binding dehydrogenase	823197..824174		+	No	87	No	G	G	G	G	G	G	G	G	G	G	G	G	G	T	G	G	G	G	G	G	G	G	G	G	G	G	G	G	G	G	G	G	G
825985	C->G	No|intergenic					INTERGENIC								87	Yes	C	C	C	C	C	C	C	C	C	C	C	C	C	G	C	C	C	C	C	C	C	C	C	C	C	C	C	C	C	C	C	C	C
829558	G->T	No|intergenic					BP0806P								88-42	No	G	G	G	G	G	G	G	G	G	G	G	G	G	G	G	G	G	G	G	G	G	G	G	G	G	G	G	G	G	G	G	G	G
831956	G->A	Yes	A	T	GCC	ACC	BP0807	990	-	putative exported protein	830999..831988		+	No	33-104	No	G	G	G	G	G	G	G	G	G	G	G	G	G	G	G	G	G	G	G	G	G	G	G	G	G	G	G	G	G	G	G	G	G
835998	G->A	No|intergenic					BP0812P								Tohama I	Yes	G	A	A	A	A	A	A	A	A	A	A	A	A	A	A	A	A	A	A	A	A	A	A	A	A	A	A	A	A	A	A	A	A
838886	G->A	Yes	V	V	GTC	GTT	BP0814	891	-	probable LysR-family transcriptional regulator	complement(838301..839191)		-	Yes	145	Yes	G	G	G	G	A	G	G	G	G	G	G	G	G	G	G	G	G	G	G	G	G	G	G	G	G	G	G	G	G	G	G	G	G
848023	C->T	Yes	V	V	GTG	GTA	BP0821	2013	hyuB	hydantoin utilization protein B	complement(847318..849330)		-	Yes	Tohama I	Yes	C	T	T	T	T	T	T	T	T	T	T	T	T	T	T	T	T	T	T	T	T	T	T	T	T	T	T	T	T	T	T	T	T
850578	G->A	Yes	A	A	GCC	GCT	BP0822	2073	hyuA	hydantoin utilization protein A	complement(849327..851399)		-	Yes	101	No	G	G	G	G	G	G	G	G	G	G	G	G	G	G	G	G	G	G	G	G	G	G	G	G	G	G	G	G	G	G	G	G	G
864189	G->A	Yes	D	N			BP0833	958		conserved hypothetical protein (Pseudogene)				No	146-end	Yes	G	G	G	A	A	A	A	A	A	A	A	A	A	A	A	A	A	A	A	A	A	A	A	A	A	A	A	A	A	A	A	A	A
865783	C->T	Yes	P	L	CCC	CTC	BP0835	804	-	putative membrane protein	865737..866540		+	No	127-141	No	C	C	C	C	C	C	C	C	C	C	C	C	C	C	C	C	C	C	C	C	C	C	C	C	C	C	T	T	C	C	C	C	C
876478	T->C	Yes	D	D	GAT	GAC	BP0847	2328	nuoG	NADH-ubiquinone oxidoreductase, 75 kDa subunit	875321..877648		+	Yes	Tohama I	Yes	T	C	C	C	C	C	C	C	C	C	C	C	C	C	C	C	C	C	C	C	C	C	C	C	C	C	C	C	C	C	C	C	C
883816	C->T	Yes	L	F	CTC	TTC	BP0854	1485	nuoN	NADH-ubiquinone oxidoreductase, chain N	883741..885225		+	No	145-end	Yes	C	C	C	C	T	T	T	T	T	T	T	T	T	T	T	T	T	T	T	T	T	T	T	T	T	T	T	T	T	T	T	T	T
896887	T->C	No|intergenic					BP0863P		serBP						Tohama I	Yes	T	C	C	C	C	C	C	C	C	C	C	C	C	C	C	C	C	C	C	C	C	C	C	C	C	C	C	C	C	C	C	C	C
897754	G->A	Yes	H	Y	CAC	TAC	BP0864	3432	mfd	transcription-repair coupling factor	complement(896909..900340)		-	No	49	No	G	G	G	G	G	G	G	G	G	G	A	G	G	G	G	G	G	G	G	G	G	G	G	G	G	G	G	G	G	G	G	G	G
914229	C->T	Yes	E	K	GAG	AAG	BP0878	1302	-	putative phospholipase	complement(913306..914607)		-	No	146	No	C	C	C	T	C	C	C	C	C	C	C	C	C	C	C	C	C	C	C	C	C	C	C	C	C	C	C	C	C	C	C	C	C
921453	C->T	Yes	P	P	CCC	CCT	BP0883	522	-	biotin carboxyl carrier protein	921253..921774		+	Yes	90	No	C	C	C	C	C	C	C	C	C	C	C	C	C	C	T	C	C	C	C	C	C	C	C	C	C	C	C	C	C	C	C	C	C
925252	T->C	Yes	R	R	CGT	CGC	BP0887	1056	-	Conserved hypothetical protein	924515..925570		+	Yes	Tohama I	Yes	T	C	C	C	C	C	C	C	C	C	C	C	C	C	C	C	C	C	C	C	C	C	C	C	C	C	C	C	C	C	C	C	C
926293	T->C	Yes	I	I	ATT	ATC	BP0888	792	-	GntR-family transcriptional regulator	925583..926374		+	Yes	Tohama I	Yes	T	C	C	C	C	C	C	C	C	C	C	C	C	C	C	C	C	C	C	C	C	C	C	C	C	C	C	C	C	C	C	C	C
928922	A->G	No|intergenic					BP0891P								Tohama I	Yes	A	N	N	N	N	G	N	N	N	N	N	N	G	N	N	N	N	N	N	N	N	N	N	N	N	N	N	G	N	N	N	N	N
928923	C->A	No|intergenic					BP0891P								Tohama I	Yes	C	N	N	N	N	A	N	N	N	N	N	N	A	N	N	N	N	N	N	N	N	N	N	N	N	N	N	N	N	N	N	N	N
929666	G->A	Yes	R	H	CGC	CAC	BP0891	951	-	transposase	928954..929904		+	No	145-end	Yes	G	N	G	G	A	N	N	A	N	A	A	N	A	N	N	A	A	A	N	N	N	N	A	A	N	N	A	A	N	N	A	A	A
935976	C->T	No|intergenic					BP0900P								164	No	C	C	C	C	C	C	C	C	C	C	C	C	C	C	C	C	C	C	C	C	C	C	C	T	C	C	C	C	C	C	C	C	C
939561	T->C	Yes	F	L	TTC	CTC	BP0904	735	pphA	serine/threonine protein phosphatase 1	939411..940145		+	No	146-end	Yes	T	T	T	C	C	C	C	C	C	C	C	C	C	C	C	C	C	C	C	C	C	C	C	C	C	C	C	C	C	C	C	C	C
976297	A->G	No|intergenic					INTERGENIC								80-154	No	A	A	A	A	A	G	G	G	A	A	A	A	A	A	A	A	A	A	A	A	A	A	A	A	A	A	A	A	A	A	A	A	A
997017	G->A	Yes	G	E	GGG	GAG	BP0958	912	cysM	cysteine synthase B	996278..997189		+	No	multiple	Yes	G	G	G	A	A	A	A	N	A	C	A	A	A	A	C	C	G	C	N	G	G	A	N	A	N	A	G	G	A	G	A	A	A
1013535	T->C	Yes	T	A	ACC	GCC	BP0974	873	-	putative membrane protein	complement(1013014..1013886)		-	No	Tohama I	Yes	T	C	C	C	C	C	C	C	C	C	C	C	C	C	C	C	C	C	C	C	C	C	C	C	C	C	C	C	C	C	C	C	C
1023059	G->A	Yes	A	T	GCC	ACC	BP0985	3180	acrB	acriflavine resistance protein B	1022462..1025641		+	No	146	Yes	G	G	G	A	G	G	G	G	G	G	G	G	G	G	G	G	G	G	G	G	G	G	G	G	G	G	G	G	G	G	G	G	G
1026116	C->T	Yes	P	L	CCG	CTG	BP0986	1383	cusC	probable outer membrane lipoprotein	1025638..1027020		+	No	Tohama I	Yes	C	T	T	T	T	T	T	T	T	T	T	T	T	T	T	T	T	T	T	T	T	T	T	T	T	T	T	T	T	T	T	T	T
1043651	T->C	Yes	V	A	GTA	GCA	BP0999	2037	tkt	transketolase 1	1043602..1045638		+	No	Clade 4	No	T	T	T	T	T	T	T	T	T	T	T	T	T	T	T	T	C	C	T	T	T	T	T	T	T	T	T	T	T	T	T	T	T
1046955	G->T	Yes	A	S	GCG	TCG	BP1001	1194	pgk	phosphoglycerate kinase	1046784..1047977		+	No	146	No	G	G	G	T	G	G	G	G	G	G	G	G	G	G	G	G	G	G	G	G	G	G	G	G	G	G	G	G	G	G	G	G	G
1055340	G->T	No|intergenic					BP1007P								90	Yes	G	G	G	G	N	N	N	N	N	N	N	N	N	N	T	N	N	N	N	N	N	N	N	N	N	N	G	G	G	G	G	N	N
1055873	G->T	Yes	L	I	CTC	ATC	BP1009	549	-	Conserved hypothetical protein	complement(1055586..1056134)		-	No	61	No	G	G	G	G	G	G	G	G	G	T	G	G	G	G	G	G	G	G	G	G	G	G	G	G	G	G	G	G	G	G	G	G	G
1057993	C->T	Yes	A	A	GCC	GCT	BP1012	318	-	Conserved hypothetical protein	1057757..1058074		+	Yes	82	No	C	C	C	C	C	C	C	C	C	C	C	C	C	C	C	C	C	C	C	C	C	C	C	C	C	C	C	C	C	C	C	T	C
1059217	G->A	Yes	T	T	ACC	ACT	BP1014	1476	pit	probable phosphate transporter	complement(1059085..1060560)		-	Yes	33-104	No	G	G	G	G	G	G	G	G	G	G	G	G	G	G	G	G	G	G	G	G	G	G	G	G	G	G	G	G	G	G	G	G	G
1059382	C->T	Yes	W	STOP	TGG	TGA	BP1014		pit	probable phosphate transporter	complement(1059085..1060560)		-	No	146-end	Yes	C	C	C	T	T	T	T	T	T	T	T	T	T	T	T	T	T	T	T	T	T	T	T	T	T	T	T	T	T	T	T	T	T
1063386	A->G	No|intergenic					BP1019P / BP1020P		infAP / -						Tohama I	Yes	A	G	G	G	G	G	G	G	G	G	G	G	G	G	G	G	G	G	G	G	G	G	G	G	G	G	G	G	G	G	G	G	G
1069381	C->T	Yes	A	A	GCC	GCT	BP1028	2058	cheA	chemotaxis protein CheA	1069238..1071295		+	Yes	88-42	No	C	C	C	C	C	C	C	C	C	C	C	C	C	C	C	C	C	C	C	C	C	C	C	C	C	C	C	C	C	C	C	C	C
1076665	T->C	No|intergenic					INTERGENIC								15	No	T	T	T	T	T	T	T	T	C	T	T	T	T	T	T	T	T	T	T	T	T	T	T	T	T	T	T	T	T	T	T	T	T
1076759	A->T	Yes	L	Q	CTG	CAG	BP1035	1017	-	transposase for IS1663	complement(1076689..1077705)		-	No	multiple	Yes	A	A	A	A	N	N	N	N	N	N	T	A	A	N	N	N	T	N	N	N	N	N	N	N	N	T	N	N	T	N	T	N	A
1077844	C->T	No|intergenic					BP1035P								145-end	Yes	C	C	C	C	T	N	T	N	T	N	T	T	T	T	T	T	T	N	T	T	T	T	T	N	T	T	T	T	N	N	T	T	N
1078477	C->T	No|intergenic					BPt15P / BP1036P		- / -						136-138	Yes	C	T	T	C	C	C	C	C	C	C	C	C	C	C	C	C	C	C	C	C	C	C	C	C	C	C	C	C	C	C	C	C	C
1080079	G->A	Yes	SILENT				BP1037		cutE	putative apolipoprotein N-acyltransferase (Pseudogene)				Yes	136-138	Yes	G	A	A	G	G	G	G	G	G	G	G	G	G	G	G	G	G	G	G	G	G	G	G	G	G	G	G	G	G	G	G	G	G
1080686	T->C	Yes	S	G			BP1037	1645	cutE	putative apolipoprotein N-acyltransferase (Pseudogene)				No	Tohama I	Yes	T	C	C	C	C	C	C	C	C	C	C	C	C	C	C	C	C	C	C	C	C	C	C	C	C	C	C	C	C	C	C	C	C
1082401	C->T	Yes	V	V	GTG	GTA	BP1039	450	-	Conserved hypothetical protein	complement(1082209..1082658)		-	Yes	33-104	No	C	C	C	C	C	C	C	C	C	C	C	C	C	C	C	C	C	C	C	C	C	C	C	C	C	C	C	C	C	C	C	C	C
1082960	G->A	Yes	T	T	ACC	ACT	BP1040	1023	-	PhoH-like protein	complement(1082672..1083694)		-	Yes	Tohama I	Yes	G	A	A	A	A	A	A	A	A	A	A	A	A	A	A	A	A	A	A	A	A	A	A	A	A	A	A	A	A	A	A	A	A
1086126	A->T	Yes	L	Q	CTG	CAG	BP1044	1017	-	transposase for IS1663	complement(1086056..1087072)		-	No	multiple	Yes	A	N	N	N	N	T	N	A	N	T	N	N	N	T	N	N	T	N	N	N	N	N	N	N	T	T	N	N	N	N	N	N	N
1097782	G->A	No|intergenic					BP1054p		prnp						Clade 4	Yes	G	G	G	G	G	G	G	G	G	G	G	G	G	G	G	G	A	A	G	G	G	G	G	G	G	G	G	G	G	G	G	G	G
1098918	T->C	Yes	G	G	GGT	GGC	BP1054	2733	prn	pertactin precursor	1098091..1100823	Yes	+	Yes	145-end	Yes	T	T	T	T	C	C	C	C	C	C	C	C	C	C	C	C	C	C	C	C	C	C	C	C	C	C	C	C	C	C	C	C	C
1117897	A->G	Yes	S	P	TCC	CCC	BP1071	1041	phoS	phosphate-binding periplasmic protein precursor	complement(1117385..1118425)		-	No	Tohama I	Yes	A	G	G	G	G	G	G	G	G	G	G	G	G	G	G	G	G	G	G	G	G	G	G	G	G	G	G	G	G	G	G	G	G
1120235	A->G	Yes	V	A	GTC	GCC	BP1072	2082	ppk	polyphosphate kinase	complement(1118620..1120701)		-	No	81	No	A	A	A	A	A	G	A	A	A	A	A	A	A	A	A	A	A	A	A	A	A	A	A	A	A	A	A	A	A	A	A	A	A
1121852	G->A	Yes	D	N	GAC	AAC	BP1073	1494	ppx	exopolyphosphatase	1120937..1122430		+	No	85-end	No	G	G	G	G	G	G	G	G	G	G	G	G	G	G	G	G	G	G	G	G	G	G	G	G	G	G	G	G	G	G	G	G	G
1128324	C->T	Yes	E	K	GAG	AAG	BP1078	633	ftsJ	ribosomal RNA large subunit methyltransferase j	complement(1128016..1128648)		-	No	164	No	C	C	C	C	C	C	C	C	C	C	C	C	C	C	C	C	C	C	C	C	C	C	C	T	C	C	C	C	C	C	C	C	C
1129389	C->A	No|intergenic					BP1080P								Tohama I	Yes	C	A	A	A	A	A	A	A	A	A	A	A	A	A	A	A	A	A	A	A	A	A	A	A	A	A	A	A	A	A	A	A	A
1129390	C->A	No|intergenic					BP1080P								146-end	Yes	C	A	A	C	C	C	C	C	C	C	C	C	C	C	C	C	C	C	C	C	C	C	C	C	C	C	C	C	C	C	C	C	C
1129488	T->C	Yes	V	A	GTC	GCC	BP1080	951	-	transposase	1129421..1130371		+	No	multiple	Yes	T	T	T	T	N	N	N	N	N	N	N	N	N	N	N	N	N	N	N	N	N	N	N	N	N	N	N	N	N	N	N	N	N
1134238	C->A	Yes	Q	H	CAG	CAT	BP1086	951	-	transposase	complement(1134154..1135104)		-	No	fim3-2	Yes	C	C	C	C	N	N	N	A	N	N	N	N	A	A	A	A	N	N	A	N	N	A	A	A	A	A	N	N	N	N	A	N	N
1135135	T->G	No|intergenic					BP1086P								Tohama I	Yes	T	G	N	N	N	N	N	N	N	N	N	G	N	N	N	N	G	N	N	N	G	N	N	N	N	N	N	N	N	N	N	N	N
1137841	C->A	Yes	T	K	ACG	AAG	BP1090	1464	-	Conserved hypothetical protein	1137411..1138874		+	No	145-end	Yes	C	C	C	C	A	A	A	A	A	A	A	A	A	A	A	A	A	A	A	A	A	A	A	A	A	A	A	A	A	A	A	A	A
1138824	G->A	Yes	G	R	GGA	AGA	BP1090		-	Conserved hypothetical protein	1137411..1138874		+	No	85-end	No	G	G	G	G	G	G	G	G	G	G	G	G	G	G	G	G	G	G	G	G	G	G	G	G	G	G	G	G	G	G	G	G	G
1160545	C->T	No|intergenic					BP1110P		sphB3p						145	No	C	C	C	C	T	C	C	C	C	C	C	C	C	C	C	C	C	C	C	C	C	C	C	C	C	C	C	C	C	C	C	C	C
1163496	G->A	Yes	A	T	GCC	ACC	BP1110	3231	sphB3	serine protease	1160664..1163894		+	No	88-42	No	G	G	G	G	G	G	G	G	G	G	G	G	G	G	G	G	G	G	G	G	G	G	G	G	G	G	G	G	G	G	G	G	G
1170424	A->G	No|intergenic					BP1114P								multiple	Yes	A	A	A	A	N	N	N	N	N	N	N	N	G	N	N	N	N	N	N	N	N	N	N	N	N	N	N	N	N	N	N	N	N
1170425	C->A	No|intergenic					BP1114P								Tohama I	Yes	C	A	N	N	N	N	N	N	N	N	N	N	A	N	N	N	N	N	N	N	N	N	N	N	N	N	N	N	N	N	N	N	N
1175785	G->T	No|intergenic					BP1118P								Tohama I	Yes	G	T	T	N	N	N	N	T	N	N	N	T	N	N	N	N	N	N	N	N	N	N	N	N	T	N	N	N	N	N	N	T	N
1181387	G->A	Yes	P	S	CCC	TCC	BP1121	2697	aceE	pyruvate dehydrogenase E1 component	complement(1179093..1181789)		-	No	101	No	G	G	G	G	G	G	G	G	G	G	G	G	G	G	G	G	G	G	G	G	G	G	G	G	G	G	G	G	G	G	G	G	G
1182193	C->T	Yes	D	D	GAC	GAT	BP1122	489	-	AsnC-family transcriptional regulator	1181915..1182403		+	Yes	90	No	C	C	C	C	C	C	C	C	C	C	C	C	C	C	T	C	C	C	C	C	C	C	C	C	C	C	C	C	C	C	C	C	C
1194527	G->T	No|intergenic					BP1130P								154	Yes	G	N	N	G	N	N	N	T	N	N	N	N	N	N	N	N	N	N	N	N	N	N	N	N	N	N	N	N	N	N	N	N	N
1195930	A->G	Yes	S	P	TCC	CCC	BP1132	723	-	probable short-chain dehydrogenase	complement(1195664..1196386)		-	No	82	No	A	A	A	A	A	A	A	A	A	A	A	A	A	A	A	A	A	A	A	A	A	A	A	A	A	A	A	A	A	A	A	G	A
1206068	A->T	Yes	T	T	ACA	ACT	BP1142	950	-	transposase	1205130..1206080		+	Yes	136-138	No	A	T	T	A	A	A	A	A	A	A	A	A	A	A	A	A	A	A	A	A	A	A	A	A	A	A	A	A	A	A	A	A	A
1206069	G->C	Yes	V	L	GTT	CTT	BP1142		-	transposase	1205130..1206080		+	No	136-138	No	G	C	C	G	G	G	G	G	G	G	G	G	G	G	G	G	G	G	G	G	G	G	G	G	G	G	G	G	G	G	G	G	G
1219546	G->A	Yes	G	E	GGG	GAG	BP1154	846	-	putative membrane protein	1219110..1219955		+	No	146	Yes	G	G	G	A	G	G	G	G	G	G	G	G	G	G	G	G	G	G	G	G	G	G	G	G	G	G	G	G	G	G	G	G	G
1222399	A->G	No|intergenic					BP1157P								146	Yes	A	N	N	G	A	A	A	A	A	A	A	A	A	A	A	A	A	A	A	A	A	A	A	A	A	A	A	A	A	A	A	A	A
1222400	A->C	No|intergenic					BP1157P								fim3-2	Yes	A	A	A	A	N	C	N	C	N	N	C	C	N	N	N	C	N	N	N	N	N	N	N	N	N	C	N	N	N	N	N	C	N
1222401	C->T	No|intergenic					BP1157P								146	Yes	C	N	N	T	C	C	C	C	C	C	C	C	C	C	C	C	C	C	C	C	C	C	C	C	C	C	C	C	C	C	C	C	C
1223352	A->G	Yes	K	E	AAA	GAA	BP1157	951	-	transposase	1222431..1223381		+	No	multiple	No	A	N	G	A	A	A	A	A	A	A	A	A	A	A	A	A	A	A	A	A	A	A	A	A	A	A	A	A	G	A	A	A	A
1234866	G->C	Yes	P	P	CCC	CCG	BP1168	906	-	LysR-family transcriptional regulator	complement(1234719..1235624)		-	Yes	Tohama I	Yes	G	C	C	N	C	C	C	C	C	C	C	C	C	C	C	C	C	C	N	N	N	N	N	N	N	N	C	C	C	C	C	C	C
1243188	A->G	Yes	D	G	GAC	GGC	BP1177	951	-	transposase	1242269..1243219		+	No	39	No	A	A	A	A	A	A	A	A	A	A	A	A	A	A	A	A	A	A	A	A	A	A	A	A	A	A	A	A	A	A	A	A	A
1254842	A->G	Yes	Y	C	TAC	TGC	BP1193	219	-	Conserved hypothetical protein	1254787..1255005		+	No	Clade 6	Yes	A	A	A	A	A	A	A	A	A	A	A	A	A	A	A	A	A	A	A	A	A	A	A	A	A	A	G	G	G	G	G	A	A
1260723	G->C	Yes	P	P	CCG	CCC	BP1198	2598	clpB	ATP-dependent protease, ATPase subunit	1258261..1260858	Yes	+	Yes	152	No	G	G	G	G	G	G	G	G	G	G	G	G	G	G	G	G	G	G	G	G	G	G	G	G	G	G	G	G	G	G	G	G	G
1264340	T->C	No|intergenic					BP1201		tcfAp						Tohama I	Yes	T	C	C	C	C	C	C	C	C	C	C	C	C	C	C	C	C	C	C	C	C	C	C	C	C	C	C	C	C	C	C	C	C
1266395	G->T	No|intergenic					INTERGENIC								Clade 4	No	G	G	G	G	G	G	G	G	G	G	G	G	G	G	G	G	T	T	G	G	G	G	G	G	G	G	G	G	G	G	G	G	G
1267400	G->C	Yes	L	L	CTG	CTC	BP1203	1209	-	Conserved hypothetical protein	1267329..1268537	Yes	+	Yes	136-138	Yes	G	C	C	G	G	G	G	G	G	G	G	G	G	G	G	G	G	G	G	G	G	G	G	G	G	G	G	G	G	G	G	G	G
1272799	C->T	Yes	P	L	CCG	CTG	BP1208	957	-	putative exported protein	1272465..1273421		+	No	Clade 3	No	C	C	C	C	C	C	C	C	C	C	C	C	C	C	T	T	C	C	C	C	C	C	C	C	C	C	C	C	C	C	C	C	C
1275983	T->C	Yes	N	D	AAC	GAC	BP1211	801	-	putative exported protein	complement(1275837..1276637)		-	No	Tohama I	Yes	T	C	C	C	C	C	C	C	C	C	C	C	C	C	C	C	C	C	C	C	C	C	C	C	C	C	C	C	C	C	C	C	C
1282945	C->T	Yes	E	K	GAA	AAA	BP1219	864	-	putative phytoene synthase	complement(1282106..1282969)		-	No	15	No	C	C	C	C	C	C	C	C	T	C	C	C	C	C	C	C	C	C	C	C	C	C	C	C	C	C	C	C	C	C	C	C	C
1288656	G->A	Yes	A	V	GCG	GTG	BP1226	1677	-	conserved hypothetical protein	complement(1288340..1290016)		-	No	155-129	No	G	G	G	G	G	G	G	G	G	G	G	G	G	G	G	G	G	G	G	G	G	G	G	G	A	A	G	G	G	G	G	G	G
1289020	G->A	Yes	L	L	CTG	TTG	BP1226		-	conserved hypothetical protein	complement(1288340..1290016)		-	Yes	15	No	G	G	G	G	G	G	G	G	A	G	G	G	G	G	G	G	G	G	G	G	G	G	G	G	G	G	G	G	G	G	G	G	G
1290405	G->A	Yes	G	G	GGG	GGA	BP1227	1362	radA	DNA repair protein	1290181..1291542		+	Yes	145-end	Yes	G	G	G	G	A	A	A	A	A	A	A	A	A	A	A	A	A	A	A	A	A	A	A	A	A	A	A	A	A	A	A	A	A
1302599	A->G	Yes	H	R	CAC	CGC	BP1240	1005	-	Conserved hypothetical protein	1301986..1302990		+	No	Clade 2	No	A	A	A	A	A	A	A	A	A	A	A	G	G	A	A	A	A	A	A	A	A	A	A	A	A	A	A	A	A	A	A	A	A
1309284	C->T	Yes	A	V	GCG	GTG	BP1245	507	-	Conserved hypothetical protein	1308935..1309441		+	No	Clade8	No	C	C	C	C	C	C	C	C	C	C	C	C	C	C	C	C	C	C	C	C	C	C	C	C	C	C	C	C	C	C	C	C	C
1325828	G->A	Yes	D	N	GAC	AAC	BP1258	1392	sdaA	L-serine dehydratase 1	1325429..1326820		+	No	90	No	G	G	G	G	G	G	G	G	G	G	G	G	G	G	A	G	G	G	G	G	G	G	G	G	G	G	G	G	G	G	G	G	G
1327960	C->T	Yes	G	D	GGC	GAC	BP1260	2883	glnE	glutamate-ammonia-ligase adenylyltransferase	complement(1327653..1330535)		-	No	Tohama I	Yes	C	T	T	T	T	T	T	T	T	T	T	T	T	T	T	T	T	T	T	T	T	T	T	T	T	T	T	T	T	T	T	T	T
1331840	G->A	Yes	A	T			BP1261	3854		conserved hypothetical protein (Pseudogene)				No	145-end	Yes	G	G	G	G	A	A	A	A	A	A	A	A	A	A	A	A	A	A	A	A	A	A	A	A	A	A	A	A	A	A	A	A	A
1336620	C->T	Yes	A	A	GCC	GCT	BP1264	1962	nfxD	topoisomerase IV subunit B	1336240..1338201		+	Yes	147	No	C	C	C	C	C	C	C	C	C	C	C	C	T	C	C	C	C	C	C	C	C	C	C	C	C	C	C	C	C	C	C	C	C
1350999	A->C	Yes	I	S	ATC	AGC	BP1278	951	-	transposase	complement(1350995..1351945)		-	No	161	No	A	A	A	A	A	A	A	A	A	A	A	A	A	A	A	A	A	A	A	A	A	A	A	A	A	A	A	A	A	A	A	A	A
1353438	C->T	Yes	T	T	ACG	ACA	BP1280	834	proC	pyrroline-5-carboxylate reductase	complement(1352877..1353710)		-	Yes	Tohama I	Yes	C	T	T	T	T	T	T	T	T	T	T	T	T	T	T	T	T	T	T	T	T	T	T	T	T	T	T	T	T	T	T	T	T
1366509	C->A	Yes	A	A	GCG	GCT	BP1295	471	-	hypothetical protein	complement(1366416..1366886)		-	Yes	50	No	C	C	C	C	C	C	C	C	C	C	C	C	C	C	C	C	C	C	C	C	C	C	C	C	C	C	C	C	C	C	C	C	C
1367650	C->T	Yes	A	T	GCC	ACC	BP1296	828	-	putative lipoprotein	complement(1367012..1367839)	Yes	-	No	136-138	No	C	T	T	C	C	C	C	C	C	C	C	C	C	C	C	C	C	C	C	C	C	C	C	C	C	C	C	C	C	C	C	C	C
1379553	G->A	No|intergenic					PB1311/BP1312P								15	No	G	G	G	G	G	G	G	G	A	G	G	G	G	G	G	G	G	G	G	G	G	G	G	G	G	G	G	G	G	G	G	G	G
1381251	C->G	Yes	A	P	GCC	CCC	BP1314	888	-	putative exported protein	complement(1380988..1381875)		-	No	Tohama I	Yes	C	G	G	G	G	G	G	G	G	G	G	G	G	G	G	G	G	G	G	G	G	G	G	G	G	G	G	G	G	G	G	G	G
1387144	C->T	Yes					BP1322	2972		two-component sensor histidine kinase (Pseudogene)					clade 5	Yes	C	C	C	C	C	C	C	C	C	C	C	C	C	C	C	C	C	C	T	T	T	T	T	T	T	T	C	C	C	C	C	C	C
1388256	C->T	Yes					BP1322			two-component sensor histidine kinase (Pseudogene)					Clade 4	No	C	C	C	C	C	C	C	C	C	C	C	C	C	C	C	C	T	T	C	C	C	C	C	C	C	C	C	C	C	C	C	C	C
1393494	C->T	Yes	G	A			BP1324	1374	malA	putative 4-alpha-glucanotransferase (pseudogene)				No	136-138	Yes	C	T	T	C	C	C	C	C	C	C	C	C	C	C	C	C	C	C	C	C	C	C	C	C	C	C	C	C	C	C	C	C	C
1401560	C->T	Yes	G	S	GGC	AGC	BP1329	3342	-	alpha-glucosidase	complement(1399641..1402982)		-	No	50-31	No	C	C	C	C	C	C	C	C	C	C	C	C	C	C	C	C	C	C	C	C	C	C	C	C	C	C	C	C	C	C	C	C	C
1402731	C->T	Yes	S	S	TCG	TCA	BP1329		-	alpha-glucosidase	complement(1399641..1402982)		-	Yes	154	No	C	C	C	C	C	C	C	T	C	C	C	C	C	C	C	C	C	C	C	C	C	C	C	C	C	C	C	C	C	C	C	C	C
1405754	C->A	No|intergenic					BP1330P								31	No	C	C	C	C	C	C	C	C	C	C	C	C	C	C	C	C	C	C	C	C	C	C	C	C	C	C	C	C	C	C	C	C	C
1412262	G->A	Yes	D	D	GAC	GAT	BP1340	759	-	Conserved hypothetical protein	complement(1412229..1412987)		-	Yes	129	No	G	G	G	G	G	G	G	G	G	G	G	G	G	G	G	G	G	G	G	G	G	G	G	G	G	A	G	G	G	G	G	G	G
1430754	A->G	Yes	T	T	ACT	ACC	BP1355	1041	-	probable LacI-family transcriptional regulator	complement(1430445..1431485)		-	Yes	Tohama I	Yes	A	G	G	G	G	G	G	G	G	G	G	G	G	G	G	G	G	G	G	G	G	G	G	G	G	G	G	G	G	G	G	G	G
1432534	C->T	Yes					BP1357	1418	leuC	3-isopropylmalate dehydratase large subunit					53	No	C	C	C	C	C	C	C	C	C	C	C	C	C	C	C	C	C	C	C	C	C	C	C	C	C	C	C	C	C	C	C	C	C
1434370	G->A	Yes	G	E	GGA	GAA	BP1358	996	-	putative exported protein	1433670..1434665		+	No	36-124	No	G	G	G	G	G	G	G	G	G	G	G	G	G	G	G	G	G	G	G	G	G	G	G	G	G	G	G	G	G	G	G	G	G
1438020	C->T	Yes	G	D	GGC	GAC	BP1362	771	-	putative amino-acid ABC transporter, ATP-binding protein	complement(1437896..1438666)		-	No	Clade 6	Yes	C	C	C	C	C	C	C	C	C	C	C	C	C	C	C	C	C	C	C	C	C	C	C	C	C	C	T	T	T	T	T	C	C
1440255	C->T	No|intergenic					BP1364P								136-138	No	C	T	T	C	C	C	C	C	C	C	C	C	C	C	C	C	C	C	C	C	C	C	C	C	C	C	C	C	C	C	C	C	C
1440515	A->T	Yes	L	Q	CTG	CAG	BP1365	1017	-	transposase for IS1663	complement(1440445..1441461)		-	No	multiple	Yes	A	N	N	A	T	N	N	N	N	N	T	N	T	A	N	N	N	T	N	N	T	N	N	T	N	T	T	N	N	N	T	T	N
1449225	C->T	No|intergenic					BP1373P		flgBp						131	No	C	C	C	C	C	C	C	C	C	C	C	C	C	C	C	C	C	C	C	C	C	C	C	C	C	C	C	C	T	C	C	C	C
1449886	C->T	Yes	P	S	CCC	TCC	BP1374	420	fla FIII	flagellar basal-body rod protein FlgC	1449658..1450077		+	No	Clade 6	No	C	C	C	C	C	C	C	C	C	C	C	C	C	C	C	C	C	C	C	C	C	C	C	C	C	C	T	T	T	T	T	C	C
1452167	A->G	Yes	T	A	ACC	GCC	BP1376	1422	fla FV	flagellar hook protein FlgE	1450895..1452316		+	No	Clade 2	No	A	A	A	A	A	A	A	A	A	A	A	G	G	A	A	A	A	A	A	A	A	A	A	A	A	A	A	A	A	A	A	A	A
1489004	C->T	Yes	G	S	GGC	AGC	BP1416	477	dsbB	disulfide bond formation protein B	complement(1488756..1489232)		-	No	146	Yes	C	C	C	T	C	C	C	C	C	C	C	C	C	C	C	C	C	C	C	C	C	C	C	C	C	C	C	C	C	C	C	C	C
1497453	C->T	No|intergenic					BP1423P		uppSp						82	No	C	C	C	C	C	C	C	C	C	C	C	C	C	C	C	C	C	C	C	C	C	C	C	C	C	C	C	C	C	C	C	T	C
1497846	C->T	Yes	A	V	GCG	GTG	BP1423	765	rth	undecaprenyl pyrophosphate synthetase	1497578..1498342		+	No	50	No	C	C	C	C	C	C	C	C	C	C	C	C	C	C	C	C	C	C	C	C	C	C	C	C	C	C	C	C	C	C	C	C	C
1500486	C->T	Yes	A	V	GCC	GTC	BP1426	1335	-	putative membrane protein	1500455..1501789		+	No	15	No	C	C	C	C	C	C	C	C	T	C	C	C	C	C	C	C	C	C	C	C	C	C	C	C	C	C	C	C	C	C	C	C	C
1503340	A->C	Yes	Y	S	TAC	TCC	BP1427	2337	-	probable surface antigen	1501842..1504178	Yes	+	No	146	Yes	A	A	A	C	A	A	A	A	A	A	A	A	A	A	A	A	A	A	A	A	A	A	A	A	A	A	A	A	A	A	A	A	A
1510060	C->T	Yes	K	K	AAG	AAA	BP1435	828	-	Conserved hypothetical protein	complement(1509841..1510668)	Yes	-	Yes	50-end	No	C	C	C	C	C	C	C	C	C	C	C	C	C	C	C	C	C	C	C	C	C	C	C	C	C	C	C	C	C	C	C	C	C
1510867	C->T	Yes	T	M	ACG	ATG	BP1436	2364	pps	phosphoenolpyruvate synthase	1510830..1513193	Yes	+	No	87	Yes	C	C	C	C	C	C	C	C	C	C	C	C	C	T	C	C	C	C	C	C	C	C	C	C	C	C	C	C	C	C	C	C	C
1519199	G->T	No|intergenic					BP1445P								Tohama I	Yes	G	T	T	T	T	T	T	T	T	T	T	T	T	T	T	T	T	T	T	T	T	T	T	T	T	T	T	T	T	T	T	T	T
1547488	A->G	Yes	N	S	AAC	AGC	BP1471	630	-	Conserved hypothetical protein	1547484..1548113		+	No	145-end	Yes	A	A	A	A	G	G	G	G	G	G	G	G	G	G	G	G	G	G	G	G	G	G	G	G	G	G	G	G	G	G	G	G	G
1565468	A->G	Yes	T	A	ACC	GCC	BP1487	1095	smoM	putative periplasmic solute-binding protein	1565003..1566097	Yes	+	No	146	Yes	A	A	A	G	A	A	A	A	A	A	A	A	A	A	A	A	A	A	A	A	A	A	A	A	A	A	A	A	A	A	A	A	A
1565529	G->A	Yes	R	K	AGG	AAG	BP1487		smoM	putative periplasmic solute-binding protein	1565003..1566097	Yes	+	No	Tohama I	Yes	G	A	A	A	A	A	A	A	A	A	A	A	A	A	A	A	A	A	A	A	A	A	A	A	A	A	A	A	A	A	A	A	A
1582705	C->T	Yes	A	V	GCG	GTG	BP1505	951	-	putative ornithine cyclodeaminase	1584288..1585208		+	No	53	No	C	C	C	C	C	C	C	C	C	C	C	C	C	C	C	C	C	C	C	C	C	C	C	C	C	C	C	C	C	C	C	C	C
1584697	C->T	Yes	T	I	ACC	ATC	BP1507	921	-	putative extracellular solute-binding protein	complement(1590614..1591129)		+	No	Clade 4	No	C	C	C	C	C	C	C	C	C	C	C	C	C	C	C	C	T	T	C	C	C	C	C	C	C	C	C	C	C	C	C	C	C
1590980	G->A	Yes	F	F	TTC	TTT	BP1515	516	-	putative transporter protein	1612764..1613651		-	Yes	82	No	G	G	G	G	G	G	G	G	G	G	G	G	G	G	G	G	G	G	G	G	G	G	G	G	G	G	G	G	G	G	G	A	G
1613367	T->G	Yes	W	G	TGG	GGG	BP1539	888	-	probable LysR-familyt ranscriptional regulator	1615241..1615819		+	No	Tohama I	Yes	T	G	G	G	G	G	G	G	G	G	G	G	G	G	G	G	G	G	G	G	G	G	G	G	G	G	G	G	G	G	G	G	G
1615665	C->T	Yes	A	V	GCG	GTG	BP1542	579	-	Conserved hypothetical protein	1620554..1623214		+	No	Tohama I	Yes	C	T	T	T	T	T	T	T	T	T	T	T	T	T	T	T	T	T	T	T	T	T	T	T	T	T	T	T	T	T	T	T	T
1623068	T->C	Yes	L	L	TTG	CTG	BP1547	2661	-	Conserved hypothetical protein	1645757..1646944		+	Yes	Tohama I	Yes	T	C	C	C	C	C	C	C	C	C	C	C	C	C	C	C	C	C	C	C	C	C	C	C	C	C	C	C	C	C	C	C	C
1626880	G->C	No|intergenic					BP1549P		dnaXP						Tohama I	Yes	G	C	C	C	C	C	C	C	C	C	C	C	C	C	C	C	C	C	C	C	C	C	C	C	C	C	C	C	C	C	C	C	C
1646940	C->T	Yes	P	L	CCC	CTC	BP1567	1188	-	Conserved hypothetical protein	1647602..1648216		+	No	145	No	C	C	C	C	T	C	C	C	C	C	C	C	C	C	C	C	C	C	C	C	C	C	C	C	C	C	C	C	C	C	C	C	C
1647688	C->T	Yes	T	T	ACC	ACT	BP1568	615	fim3	serotype 3 fimbrial subunit precursor		Yes	+	Yes	146	Yes	C	C	C	T	C	C	C	C	C	C	C	C	C	C	C	C	C	C	C	C	C	C	C	C	C	C	C	C	C	C	C	C	C
1647861	C->A	Yes	A	E	GCG	GAG	BP1568		fim3	serotype 3 fimbrial subunit precursor	1647602..1648216	Yes	+	No	fim3-2	Yes	C	C	C	C	C	A	A	A	A	A	A	A	A	A	A	A	A	A	A	A	A	A	A	A	A	A	A	A	A	A	A	A	A
1649623	T->C	Yes	N	D	AAT	GAT	BP1570	879	dapA	dihydrodipicolinate synthase	complement(1649444..1650322)	Yes	-	No	Tohama I	Yes	T	C	C	C	C	C	C	C	C	C	C	C	C	C	C	C	C	C	C	C	C	C	C	C	C	C	C	C	C	C	C	C	C
1652706	T->C	Yes	Y	Y	TAT	TAC	BP1573	753	glnH	glutamine-binding periplasmic protein precursor	1652374..1653126		+	Yes	Tohama I	Yes	T	C	C	C	C	C	C	C	C	C	C	C	C	C	C	C	C	C	C	C	C	C	C	C	C	C	C	C	C	C	C	C	C
1665753	G->A	No|intergenic					INTERGENIC								149-123	No	G	G	G	G	G	G	G	G	G	G	G	G	G	G	G	G	G	G	G	G	A	A	G	G	G	G	G	G	G	G	G	G	G
1670288	T->G	Yes	G	G	GGA	GGC	BP1592	1803	-	Conserved hypothetical protein	complement(1669877..1671679)		-	Yes	Tohama I	Yes	T	G	G	G	G	G	G	G	G	G	G	G	G	G	G	G	G	G	G	G	G	G	G	G	G	G	G	G	G	G	G	G	G
1681774	C->T	Yes	S	N	AGC	AAC	BP1602	951	-	transposase	complement(1681770..1682720)		-	No	91	No	C	C	C	C	C	C	C	C	C	C	C	C	C	C	C	C	C	C	C	T	C	C	C	C	C	C	C	C	C	C	C	C	C
1682752	C->T	No|intergenic					BP1602P								multiple	Yes	C	C	C	C	N	N	N	N	N	N	N	N	N	N	N	N	N	N	N	N	N	N	N	N	N	N	N	N	N	N	N	N	N
1707573	C->T	Yes	A	V	GCG	GTG	BP1624	747	kpsT	polysialic acid transport ATP-binding protein	1706948..1707694		+	No	101	No	C	C	C	C	C	C	C	C	C	C	C	C	C	C	C	C	C	C	C	C	C	C	C	C	C	C	C	C	C	C	C	C	C
1708840	C->G	Yes	L	V	CTG	GTG	BP1625	1170	kpsE	capsule polysaccharide export inner-membrane protein	1707736..1708905		+	No	53	No	C	C	C	C	C	C	C	C	C	C	C	C	C	C	C	C	C	C	C	C	C	C	C	C	C	C	C	C	C	C	C	C	C
1726747	C->T	Yes	M	I	ATG	ATA	BP1639	491	-	putative exported protein	complement(1725739..1726749)		-	No	146	Yes	C	C	C	T	C	C	C	C	C	C	C	C	C	C	C	C	C	C	C	C	C	C	C	C	C	C	C	C	C	C	C	C	C
1727091	T->C	Yes	V	M			BP1639A	969		conserved hypothetical protein (pseudogene)				No	Tohama I	Yes	T	C	C	C	C	C	C	C	C	C	C	C	C	C	C	C	C	C	C	C	C	C	C	C	C	C	C	C	C	C	C	C	C
1729089	A->G	Yes	V	A	GTG	GCG	BP1641	969	-	putative regulatory protein	complement(1728173..1729141)		-	No	85	No	A	A	A	A	A	A	A	A	A	A	A	A	A	A	A	A	A	A	A	A	A	A	A	A	A	A	A	A	A	A	A	A	A
1739396	G->A	No|intergenic					BP1653P								multiple	Yes	G	G	G	N	N	N	N	N	N	N	N	N	N	N	N	N	N	N	N	N	N	N	N	N	N	N	N	N	N	N	N	N	A
1740455	T->C	Yes	S	G	AGC	GGC	BP1654	1557	wcbQ	putative capsular polysaccharide biosynthesis protein	complement(1740375..1741931)		-	No	Tohama I	Yes	T	C	C	C	C	C	C	C	C	C	C	C	C	C	C	C	C	C	C	C	C	C	C	C	C	C	C	C	C	C	C	C	C
1743738	T->C	No|intergenic					BP1656/BP1657P								multiple	Yes	T	T	T	T	N	N	N	N	N	N	N	N	N	N	T	T	N	N	N	N	N	N	N	N	N	N	N	C	N	N	N	N	N
1748290	C->G	Yes	P	A	CCC	GCC	BP1660	3036	sphB2	autotransporter	1747462..1750497		+	No	Tohama I	Yes	C	G	G	G	G	G	G	G	G	G	G	G	G	G	G	G	G	G	G	G	G	G	G	G	G	G	G	G	G	G	G	G	G
1748294	A->G	Yes	D	G	GAC	GGC	BP1660		sphB2	autotransporter	1747462..1750497		+	No	Tohama I	Yes	A	G	G	G	G	G	G	G	G	G	G	G	G	G	G	G	G	G	G	G	G	G	G	G	G	G	G	G	G	G	G	G	G
1750329	C->T	Yes	S	S	AGC	AGT	BP1660		sphB2	autotransporter	1747462..1750497		+	Yes	90	No	C	C	C	C	C	C	C	C	C	C	C	C	C	C	T	C	C	C	C	C	C	C	C	C	C	C	C	C	C	C	C	C	C
1750584	T->C	Yes	D	G	GAC	GGC	BP1662	300	-	putative DNA-binding protein	complement(1750511..1750810)		-	No	Tohama I	Yes	T	C	C	C	C	C	C	C	C	C	C	C	C	C	C	C	C	C	C	C	C	C	C	C	C	C	C	C	C	C	C	C	C
1766556	C->G	Yes					BP1681	423	arsC	arsenate reductase (Pseudogene)					146	No	C	C	C	G	C	C	C	C	C	C	C	C	C	C	C	C	C	C	C	C	C	C	C	C	C	C	C	C	C	C	C	C	C
1769383	C->T	Yes					BP1684	1484		conserved hypothetical protein (Pseudogene)					90	No	C	C	C	C	C	C	C	C	C	C	C	C	C	C	T	C	C	C	C	C	C	C	C	C	C	C	C	C	C	C	C	C	C
1777467	T->C	Yes	I	I	ATT	ATC	BP1691	2934	phaA	putative pH Adaptation potassium efflux protein	1775425..1778358		+	Yes	Tohama I	Yes	T	C	C	C	C	C	C	C	C	C	C	C	C	C	C	C	C	C	C	C	C	C	C	C	C	C	C	C	C	C	C	C	C
1788647	G->A	Yes	D	D	GAC	GAT	BP1704	624	-	putative membrane protein	complement(1788296..1788919)		-	Yes	clade 5	Yes	G	G	G	G	G	G	G	G	G	G	G	G	G	G	G	G	G	G	A	A	A	A	A	A	A	A	G	G	G	G	G	G	G
1788668	C->T	Yes	P	P	CCG	CCA	BP1704		-	putative membrane protein	complement(1788296..1788919)		-	Yes	152	No	C	C	C	C	C	C	C	C	C	C	C	C	C	C	C	C	C	C	C	C	C	C	C	C	C	C	C	C	C	C	C	C	C
1795894	C->A	No|intergenic					BP1711P								fim3-2	Yes	C	C	C	N	N	A	N	A	N	A	A	A	A	N	N	N	N	N	A	N	A	A	N	A	A	A	N	N	A	N	A	N	A
1801896	A->T	Yes	L	Q	CTG	CAG	BP1717	1017	-	transposase for IS1663	complement(1801826..1802842)		-	No	multiple	Yes	A	A	A	A	A	A	A	A	A	A	A	A	A	A	A	A	A	A	T	N	N	N	N	N	N	T	A	A	A	A	A	A	A
1804767	T->C	Yes	L	L	TTG	CTG	BP1720	639	pcm	protein-L-isoaspartate O-methyltransferase	1804767..1805405		+	Yes	Tohama I	Yes	T	C	C	C	C	C	C	C	C	C	C	C	C	C	C	C	C	C	C	C	C	C	C	C	C	C	C	C	C	C	C	C	C
1806314	C->T	Yes	T	M	ACG	ATG	BP1722	780	-	Conserved hypothetical protein	1806304..1807083		+	No	146-end	Yes	C	C	C	T	T	T	T	T	T	T	T	T	T	T	T	T	T	T	T	T	T	T	T	T	T	T	T	T	T	T	T	T	T
1812791	C->T	Yes	R	C	CGC	TGC	BP1729	1416	-	putative pyridine nucleotide-disulfide oxidoreductase	1812146..1813561		+	No	101	No	C	C	C	C	C	C	C	C	C	C	C	C	C	C	C	C	C	C	C	C	C	C	C	C	C	C	C	C	C	C	C	C	C
1814565	T->C	Yes	H	R	CAC	CGC	BP1731	750	ugpQ	glycerophosphoryl diester phosphodiesterase	complement(1814441..1815190)		-	No	101	No	T	T	T	T	T	T	T	T	T	T	T	T	T	T	T	T	T	T	T	T	T	T	T	T	T	T	T	T	T	T	T	T	T
1817233	C->A	Yes	Q	K	CAG	AAG	BP1732	1956	ppiD	peptidyl-prolyl cis-trans isomerase D	1815433..1817388		+	No	Clade 2	No	C	C	C	C	C	C	C	C	C	C	C	A	A	C	C	C	C	C	C	C	C	C	C	C	C	C	C	C	C	C	C	C	C
1820389	C->T	Yes	A	A	GCG	GCA	BP1737	162	-	putative membrane protein	complement(1820308..1820469)		-	Yes	146	No	C	C	C	T	C	C	C	C	C	C	C	C	C	C	C	C	C	C	C	C	C	C	C	C	C	C	C	C	C	C	C	C	C
1820741	C->T	No|intergenic					BP1738P								85-end	No	C	C	C	C	C	C	C	C	C	C	C	C	C	C	C	C	C	C	C	C	C	C	C	C	C	C	C	C	C	C	C	C	C
1827556	G->A	Yes	SILENT				BP1741	962		putative ABC transporter (Pseudogene)				Yes	145-end	Yes	G	G	G	G	A	A	A	A	A	A	A	A	A	A	A	A	A	A	A	A	A	A	A	A	A	A	A	A	A	A	A	A	A
1840793	G->A	Yes	R	R	CGC	CGT	BP1754	966	ribF	riboflavin biosynthesis protein	complement(1840460..1841425)		-	Yes	53	No	G	G	G	G	G	G	G	G	G	G	G	G	G	G	G	G	G	G	G	G	G	G	G	G	G	G	G	G	G	G	G	G	G
1846835	C->T	Yes	A	V	GCC	GTC	BP1759	2301	mutU	DNA helicase II	1846366..1848666		+	No	152	No	C	C	C	C	C	C	C	C	C	C	C	C	C	C	C	C	C	C	C	C	C	C	C	C	C	C	C	C	C	C	C	C	C
1848259	G->A	Yes	A	T	GCG	ACG	BP1759		mutU	DNA helicase II	1846366..1848666		+	No	15	No	G	G	G	G	G	G	G	G	A	G	G	G	G	G	G	G	G	G	G	G	G	G	G	G	G	G	G	G	G	G	G	G	G
1849919	G->A	Yes	G	G	GGC	GGT	BP1760	2613	-	putative exported protein	complement(1848719..1851331)		-	Yes	53-17	No	G	G	G	G	G	G	G	G	G	G	G	G	G	G	G	G	G	G	G	G	G	G	G	G	G	G	G	G	G	G	G	G	G
1854401	C->T	Yes	A	T	GCC	ACC	BP1762	897	-	putative adenine-specific methylase	complement(1853613..1854509)		-	No	Tohama I	Yes	C	T	T	T	T	T	T	T	T	T	T	T	T	T	T	T	T	T	T	T	T	T	T	T	T	T	T	T	T	T	T	T	T
1861522	A->G	Yes	M	V	ATG	GTG	BP1771	567	-	Conserved hypothetical protein	1861327..1861893		+	No	Tohama I	Yes	A	G	G	G	G	G	G	G	G	G	G	G	G	G	G	G	G	G	G	G	G	G	G	G	G	G	G	G	G	G	G	G	G
1869168	A->G	Yes	N	S	AAC	AGC	BP1777	2454	capR	ATP-dependent protease La	1866872..1869325	Yes	+	No	80	No	A	A	A	A	A	A	G	A	A	A	A	A	A	A	A	A	A	A	A	A	A	A	A	A	A	A	A	A	A	A	A	A	A
1880238	G->T	Yes	R	L			BP1790	962		putative exported protein (Pseudogene)				No	Tohama I	Yes	G	T	T	T	T	T	T	T	T	T	T	T	T	T	T	T	T	T	T	T	T	T	T	T	T	T	T	T	T	T	T	T	T
1885417	G->T	Yes	A	E	GCG	GAG	BP1795	1203	aspC	aromatic-amino-acid aminotransferase	complement(1884921..1886123)	Yes	-	No	Tohama I	Yes	G	T	T	T	T	T	T	T	T	T	T	T	T	T	T	T	T	T	T	T	T	T	T	T	T	T	T	T	T	T	T	T	T
1890626	G->C	Yes	L	L	CTG	CTC	BP1799	1212	iscS	cysteine desulfurase	1889727..1890938		+	Yes	80	No	G	G	G	G	G	G	C	G	G	G	G	G	G	G	G	G	G	G	G	G	G	G	G	G	G	G	G	G	G	G	G	G	G
1897065	G->A	Yes	Q	STOP	CAG	TAG	BP1808	810	paaG	probable enoyl-CoA hydratase	complement(1896853..1897662)		-	No	Clade 2	No	G	G	G	G	G	G	G	G	G	G	G	A	A	G	G	G	G	G	G	G	G	G	G	G	G	G	G	G	G	G	G	G	G
1931433	A->G	No|intergenic					BP1838P / BP1839P		- / rpsPP						146-end	Yes	A	A	A	G	G	G	G	G	G	G	G	G	G	G	G	G	G	G	G	G	G	G	G	G	G	G	G	G	G	G	G	G	G
1932067	A->G	Yes	D	G	GAC	GGC	BP1840	624	rimM	16S rRNA processing protein	1931889..1932512		+	No	Tohama I	Yes	A	G	G	G	G	G	G	G	G	G	G	G	G	G	G	G	G	G	G	G	G	G	G	G	G	G	G	G	G	G	G	G	G
1935094	T->C	Yes	D	G	GAC	GGC	BP1844	951	-	transposase	complement(1935063..1936013)		-	No	90	Yes	T	T	T	T	T	T	T	T	T	T	T	T	T	T	C	T	T	T	T	T	T	T	T	T	T	T	T	T	T	T	T	T	T
1936041	G->A	No|intergenic					BP1844P								multiple	Yes	G	N	N	N	N	N	N	N	N	N	N	N	N	N	N	N	N	N	N	N	N	N	N	N	N	N	N	N	N	A	N	N	N
1936044	G->T	No|intergenic					BP1844P								multiple	Yes	G	N	N	N	N	N	T	N	N	N	T	N	N	N	N	N	N	N	N	N	N	N	N	N	N	N	N	N	T	T	N	N	T
1947545	A->G	Yes					BP1858	1486	aldH	probable aldehyde dehydrogenase (Pseudogene)					Clade 4	No	A	A	A	A	A	A	A	A	A	A	A	A	A	A	A	A	G	G	A	A	A	A	A	A	A	A	A	A	A	A	A	A	A
1950220	G->A	Yes	A	V	GCC	GTC	BP1860	1710	ilvG	acetolactate synthase isozyme II large subunit	complement(1950204..1951913)		-	No	124	No	G	G	G	G	G	G	G	G	G	G	G	G	G	G	G	G	G	G	G	G	G	G	G	G	G	G	G	G	G	G	G	G	G
1954336	A->G	Yes	N	N	AAT	AAC	BP1863	483	-	putative membrane protein	complement(1954132..1954614)		-	Yes	Tohama I	Yes	A	G	G	G	G	G	G	G	G	G	G	G	G	G	G	G	G	G	G	G	G	G	G	G	G	G	G	G	G	G	G	G	G
1957592	T->C	No|intergenic					BP1866P								49	No	T	T	T	T	T	T	T	T	T	T	C	T	T	T	T	T	T	T	T	T	T	T	T	T	T	T	T	T	T	T	T	T	T
1965604	T->C	Yes	K	E	AAG	GAG	BP1877	3717	bvgS	virulence sensor protein	complement(1964000..1967716)	Yes	-	No	Tohama I	Yes	T	C	C	C	C	C	C	C	C	C	C	C	C	C	C	C	C	C	C	C	C	C	C	C	C	C	C	C	C	C	C	C	C
1968699	G->A	No|intergenic					BP1878P / BP1879P		bvgAP / fhaBP						clade 5	Yes	G	G	G	G	G	G	G	G	G	G	G	G	G	G	G	G	G	G	A	A	A	A	A	A	A	A	G	G	G	G	G	G	G
1972127	G->A	Yes	G	D	GGC	GAC	BP1879	10773	fhaB	filamentous hemagglutinin/adhesin	1968781..1979553	Yes	+	No	80-15	Yes	G	G	G	G	G	A	A	A	A	G	G	G	G	G	G	G	G	G	G	G	G	G	G	G	G	G	G	G	G	G	G	G	G
1980668	G->A	Yes	W	STOP	TGG	TAG	BP1881	735	fhaD	chaperone protein	1980316..1981050		+	No	136-138	No	G	A	A	G	G	G	G	G	G	G	G	G	G	G	G	G	G	G	G	G	G	G	G	G	G	G	G	G	G	G	G	G	G
1984103	T->C	Yes	F	S	TTC	TCC	BP1883	1098	fhaE	fimbrial adhesin	1983748..1984845		+	No	Tohama I	Yes	T	C	C	C	C	C	C	C	C	C	C	C	C	C	C	C	C	C	C	C	C	C	C	C	C	C	C	C	C	C	C	C	C
2005858	G->A	Yes	G	S	GGC	AGC	BP1903	1587	-	putative membrane protein	2005504..2007090		+	No	81	No	G	G	G	G	G	A	G	G	G	G	G	G	G	G	G	G	G	G	G	G	G	G	G	G	G	G	G	G	G	G	G	G	G
2021689	C->T	Yes	P	S	CCG	TCG	BP1919	1269	-	putative membrane protein	2021236..2022504		+	No	49	No	C	C	C	C	C	C	C	C	C	C	T	C	C	C	C	C	C	C	C	C	C	C	C	C	C	C	C	C	C	C	C	C	C
2025071	T->A	Yes	H	Q	CAT	CAA	BP1922	804	-	putative exported protein	2024319..2025122		+	No	Tohama I	Yes	T	A	A	A	A	A	A	A	A	A	A	A	A	A	A	A	A	A	A	A	A	A	A	A	A	A	A	A	A	A	A	A	A
2026469	C->T	Yes	P	S	CCG	TCG	BP1924	639	-	probable TetR-family transcriptional regulator	2025992..2026630		+	No	Clade 6	No	C	C	C	C	C	C	C	C	C	C	C	C	C	C	C	C	C	C	C	C	C	C	C	C	C	C	T	T	T	T	T	C	C
2040478	T->C	No|intergenic					BP1939P								33	No	T	T	T	T	T	T	T	T	T	T	T	T	T	T	T	T	T	T	T	T	T	T	T	T	T	T	T	T	T	T	T	T	T
2048929	G->A	Yes	G	S	GGC	AGC	BP1946	486	-	MarR-family transcriptional regulator	2048752..2049237		+	No	33-end	No	G	G	G	G	G	G	G	G	G	G	G	G	G	G	G	G	G	G	G	G	G	G	G	G	G	G	G	G	G	G	G	G	G
2056120	G->A	Yes	SILENT				BP1952	2293		putative cytochrome (Pseudogene)				Yes	136-138	Yes	G	A	A	G	N	N	N	N	N	N	N	N	N	N	N	N	N	N	N	N	N	N	N	N	N	N	N	N	N	N	N	N	N
2056599	A->G	Yes	S	P			BP1952			putative cytochrome (Pseudogene)				No	136-146	Yes	A	G	G	G	N	N	N	N	N	N	N	N	N	N	N	N	N	N	N	N	N	N	N	N	N	N	N	N	N	N	N	N	N
2073369	A->C	No|intergenic					BP1966								146	No	A	N	N	C	A	A	A	A	A	A	A	A	A	A	A	A	A	A	A	A	A	A	A	A	A	A	A	A	A	A	A	A	A
2080049	T->C	Yes	G	G	GGT	GGC	BP1973	1227	-	putative membrane protein	2079942..2081168		+	Yes	Tohama I	Yes	T	C	C	C	C	C	C	C	C	C	C	C	C	C	C	C	C	C	C	C	C	C	C	C	C	C	C	C	C	C	C	C	C
2102498	A->G	Yes	I	I	ATT	ATC	BP1989	1713	-	putative exported protein	complement(2101094..2102806)		-	Yes	Tohama I	Yes	A	G	G	G	G	G	G	G	G	G	G	G	G	G	G	G	G	G	G	G	G	G	G	G	G	G	G	G	G	G	G	G	G
2104868	G->A	Yes	L	L	CTG	CTA	BP1992	525	-	putative membrane protein	2104425..2104949		+	Yes	146	Yes	G	G	G	A	G	G	G	G	G	G	G	G	G	G	G	G	G	G	G	G	G	G	G	G	G	G	G	G	G	G	G	G	G
2123502	C->T	Yes	V	V	GTG	GTA	BP2012	1203	-	Conserved hypothetical protein	complement(2122890..2124092)		-	Yes	146	Yes	C	C	C	T	C	C	C	C	C	C	C	C	C	C	C	C	C	C	C	C	C	C	C	C	C	C	C	C	C	C	C	C	C
2125641	C->T	Yes	D	N	GAC	AAC	BP2014	2706	acnA	putative aconitate hydratase	complement(2125147..2127852)	Yes	-	No	146	Yes	C	C	C	T	C	C	C	C	C	C	C	C	C	C	C	C	C	C	C	C	C	C	C	C	C	C	C	C	C	C	C	C	C
2132140	C->G	No|intergenic					INTERGENIC								53-17	No	C	C	C	C	C	C	C	C	C	C	C	C	C	C	C	C	C	C	C	C	C	C	C	C	C	C	C	C	C	C	C	C	C
2141172	T->A	Yes	L	Q	CTG	CAG	BP2028	450	-	putative exported protein	2141126..2141575		+	No	Tohama I	Yes	T	A	A	A	A	A	A	A	A	A	A	A	A	A	A	A	A	A	A	A	A	A	A	A	A	A	A	A	A	A	A	A	A
2148065	C->T	No|intergenic					BP2034P / BPr01P		- / -						141-127	No	C	C	C	C	C	C	C	C	C	C	C	C	C	C	C	C	C	C	C	C	C	C	C	C	C	C	T	T	C	C	C	C	C
2156765	C->T	Yes	A	A	GCC	GCT	BP2039	1395	-	putative amidase	2156604..2157998		+	Yes	39	No	C	C	C	C	C	C	C	C	C	C	C	C	C	C	C	C	C	C	C	C	C	C	C	C	C	C	C	C	C	C	C	C	C
2173452	G->A	No|intergenic					BP2054P								101	Yes	G	N	N	N	N	G	G	N	N	N	N	N	N	N	N	N	N	N	N	N	N	N	N	N	N	N	N	N	N	N	N	N	N
2185065	T->C	Yes	V	A			BP2064	1542		putative malonyl-CoA synthetase (pseudogene)				No	146-end	Yes	T	T	T	C	C	C	C	C	C	C	C	C	C	C	C	C	C	C	C	C	C	C	C	C	C	C	C	C	C	C	C	C	C
2194741	A->G	Yes	E	E	GAA	GAG	BP2075	1347	-	putative efflux system inner membrane protein	2193464..2194810		+	Yes	multiple	Yes	A	A	N	N	N	N	N	N	N	G	N	N	G	N	G	G	N	N	N	N	G	G	N	N	G	N	G	G	N	N	G	G	N
2194756	G->A	Yes	E	E	GAG	GAA	BP2075		-	putative efflux system inner membrane protein	2193464..2194810		+	Yes	multiple	Yes	G	G	G	N	N	N	N	N	N	N	N	N	A	N	N	N	N	N	N	N	N	N	N	N	N	N	N	N	N	N	A	N	N
2198097	A->G	Yes	N	S	AAC	AGC	BP2076	3231	-	putative efflux system transmembrane protein	2194877..2198107	Yes	+	No	Tohama I	Yes	A	G	G	G	G	G	G	G	G	G	G	G	G	G	G	G	G	G	G	G	G	G	G	G	G	G	G	G	G	G	G	G	G
2198871	C->A	No|intergenic					BP2077	1495							80-81	No	C	C	C	C	C	A	A	C	C	C	C	C	C	C	C	C	C	C	C	C	C	C	C	C	C	C	C	C	C	C	C	C	C
2208379	G->A	No|intergenic					BP2086P								146	Yes	G	G	G	A	G	G	G	G	G	G	G	G	G	G	G	G	G	G	G	G	G	G	G	G	G	G	G	G	G	G	G	G	G
2221410	A->G	Yes	L	P	CTC	CCC	BP2099	1197	-	putative thiolase	complement(2220632..2221828)		-	No	Tohama I	Yes	A	G	G	G	G	G	G	G	G	G	G	G	G	G	G	G	G	G	G	G	G	G	G	G	G	G	G	G	G	G	G	G	G
2230331	G->A	Yes	A	V	GCC	GTC	BP2106	303	-	Conserved hypothetical protein	complement(2230141..2230443)		-	No	88-42	No	G	G	G	G	G	G	G	G	G	G	G	G	G	G	G	G	G	G	G	G	G	G	G	G	G	G	G	G	G	G	G	G	G
2236423	G->A	No|intergenic					BP2113	1449							80-81	No	G	G	G	G	G	A	A	G	G	G	G	G	G	G	G	G	G	G	G	G	G	G	G	G	G	G	G	G	G	G	G	G	G
2240988	A->G	Yes	T	A			BP2117	823		putative transcriptional regulator (pseudogene)				No	136-138	Yes	A	G	G	A	A	A	A	A	A	A	A	A	A	A	A	A	A	A	A	A	A	A	A	A	A	A	A	A	A	A	A	A	A
2241309	C->A	No|intergenic					INTERGENIC								Clade8	Yes	C	C	C	C	C	C	C	C	C	C	C	C	C	C	C	C	C	C	C	C	C	C	C	C	C	C	C	C	C	C	C	C	C
2244171	G->A	Yes	A	T	GCC	ACC	BP2120	1353	gor	putative glutathione reductase	2243151..2244503		+	No	Tohama I	Yes	G	A	A	A	A	A	A	A	A	A	A	A	A	A	A	A	A	A	A	A	A	A	A	A	A	A	A	A	A	A	A	A	A
2258898	C->T	Yes	E	K	GAA	AAA	BP2135	951	-	transposase	complement(2258869..2259819)		-	No	Tohama I	Yes	C	T	T	T	N	T	T	T	T	T	T	T	T	T	T	T	T	T	T	T	T	T	T	T	T	T	T	T	T	T	T	T	T
2263279	G->A	Yes	D	N	GAT	AAT	BP2138	1863	-	putative ABC-transporter membrane-spanning ATP-binding component	2261461..2263323		+	No	152	No	G	G	G	G	G	G	G	G	G	G	G	G	G	G	G	G	G	G	G	G	G	G	G	G	G	G	G	G	G	G	G	G	G
2265313	T->C	Yes	V	A	GTG	GCG	BP2141	459	-	putative exported protein	2265156..2265614		+	No	Tohama I	Yes	T	C	C	C	C	C	C	C	C	C	C	C	C	C	C	C	C	C	C	C	C	C	C	C	C	C	C	C	C	C	C	C	C
2283359	G->A	Yes	P	L	CCC	CTC	BP2162	1437	-	putative biotin synthesis protein	complement(2283331..2284767)		-	No	Clade 6	No	G	G	G	G	G	G	G	G	G	G	G	G	G	G	G	G	G	G	G	G	G	G	G	G	G	G	A	A	A	A	A	G	G
2284483	C->T	Yes	V	V	GTG	GTA	BP2162		-	putative biotin synthesis protein	complement(2283331..2284767)		-	Yes	clade 5	Yes	C	C	C	C	C	C	C	C	C	C	C	C	C	C	C	C	C	C	T	T	T	T	T	T	T	T	C	C	C	C	C	C	C
2302095	C->A	No|intergenic					INTERGENIC								85-86	No	C	C	C	C	C	C	C	C	C	C	C	C	C	C	C	C	C	C	C	C	C	C	C	C	C	C	C	C	C	C	C	C	C
2308426	C->T	Yes	A	T	GCG	ACG	BP2187	540	-	putative transferase	complement(2307962..2308501)		-	No	149-123	No	C	C	C	C	C	C	C	C	C	C	C	C	C	C	C	C	C	C	C	C	T	T	C	C	C	C	C	C	C	C	C	C	C
2318532	G->A	Yes	S	L	TCG	TTG	BP2196	1161	-	putative quinoprotein	complement(2317541..2318701)	Yes	-	No	87	Yes	G	G	G	G	G	G	G	G	G	G	G	G	G	A	G	G	G	G	G	G	G	G	G	G	G	G	G	G	G	G	G	G	G
2336144	T->C	Yes	D	G	GAC	GGC	BP2212	1209	fhp	flavohemoprotein	complement(2335942..2337150)		-	No	148	No	T	T	T	T	T	T	T	T	T	T	T	T	T	T	T	T	T	T	T	T	T	T	T	T	T	T	T	T	T	T	T	T	T
2339182	G->A	Yes	S	S	AGC	AGT	BP2215	557	ectA	L-2,4-diaminobutyric acid acetyltransferase	complement(2338834..2339394)		-	Yes	136-138	No	G	A	A	G	G	G	G	G	G	G	G	G	G	G	G	G	G	G	G	G	G	G	G	G	G	G	G	G	G	G	G	G	G
2350890	G->A	No|intergenic					BP2224P		bapAp						Clade 3	Yes	G	G	G	G	G	G	G	G	G	G	G	G	G	G	A	A	G	G	G	G	G	G	G	G	G	G	G	G	G	G	G	G	G
2353874	G->A	Yes	V	V	GTG	GTA	BP2228	1164	alr	alanine racemase, catabolic	2353764..2354927		+	Yes	Tohama I	Yes	G	A	A	A	A	A	A	A	A	A	A	A	A	A	A	A	A	A	A	A	A	A	A	A	A	A	A	A	A	A	A	A	A
2355697	G->A	Yes	Q	STOP	CAG	TAG	BP2229	2487	-	putative inner membrane transport protein	complement(2354924..2357410)		-	No	154	No	G	G	G	G	G	G	G	A	G	G	G	G	G	G	G	G	G	G	G	G	G	G	G	G	G	G	G	G	G	G	G	G	G
2356411	T->C	Yes	N	D	AAC	GAC	BP2229		-	putative inner membrane transport protein	complement(2354924..2357410)		-	No	Tohama I	Yes	T	C	C	C	C	C	C	C	C	C	C	C	C	C	C	C	C	C	C	C	C	C	C	C	C	C	C	C	C	C	C	C	C
2356417	T->C	Yes	K	E	AAA	GAA	BP2229		-	putative inner membrane transport protein	complement(2354924..2357410)		-	No	Tohama I	Yes	T	C	C	C	C	C	C	C	C	C	C	C	C	C	C	C	C	C	C	C	C	C	C	C	C	C	C	C	C	C	C	C	C
2359892	A->G	Yes	H	R	CAT	CGT	BP2231	1188	-	putative exported protein	2359468..2360655		+	No	Tohama I	Yes	A	G	G	G	G	G	G	G	G	G	G	G	G	G	G	G	G	G	G	G	G	G	G	G	G	G	G	G	G	G	G	G	G
2362855	G->A	Yes	A	A	GCG	GCA	BP2233	699	-	hypothetical protein	2362220..2362918		+	Yes	Clade 7	No	G	G	G	G	G	G	G	G	G	G	G	G	G	G	G	G	G	G	G	G	G	G	G	G	G	G	G	G	G	G	G	A	A
2363842	C->T	Yes	L	L	CTG	CTA	BP2235	1803	bscC	putative type III secretion protein	complement(2363716..2365518)		-	Yes	136-138	Yes	C	T	T	C	C	C	C	C	C	C	C	C	C	C	C	C	C	C	C	C	C	C	C	C	C	C	C	C	C	C	C	C	C
2368953	C->T	Yes	A	T	GCA	ACA	BP2241		bscQ	putative type III secretion protein	complement(2368702..2369781)		-	No	80-81	No	C	C	C	C	C	T	T	C	C	C	C	C	C	C	C	C	C	C	C	C	C	C	C	C	C	C	C	C	C	C	C	C	C
2369042	A->G	Yes	V	A	GTA	GCA	BP2241	1080	bscQ	putative type III secretion protein	complement(2368702..2369781)		-	No	87	No	A	A	A	A	A	A	A	A	A	A	A	A	A	G	A	A	A	A	A	A	A	A	A	A	A	A	A	A	A	A	A	A	A
2374322	T->C	Yes	Y	C	TAC	TGC	BP2249	408	bscI	putative type III secretion protein	complement(2374255..2374662)		-	No	145-end	Yes	T	T	T	T	C	C	C	C	C	C	C	C	C	C	C	C	C	C	C	C	C	C	C	C	C	C	C	C	C	C	C	C	C
2380907	G->A	Yes	G	D	GGC	GAC	BP2258	378	-	hypothetical protein	2380564..2380941		+	No	49	No	G	G	G	G	G	G	G	G	G	G	A	G	G	G	G	G	G	G	G	G	G	G	G	G	G	G	G	G	G	G	G	G	G
2390341	T->A	Yes	F	I	TTC	ATC	BP2268	1542	-	methyl-accepting chemotaxis protein	2388877..2390418		+	No	Tohama I	Yes	T	A	A	A	A	A	A	A	A	A	A	A	A	A	A	A	A	A	A	A	A	A	A	A	A	A	A	A	A	A	A	A	A
2392797	G->A	Yes	G	S	GGC	AGC	BP2271	1323	-	putative regulatory lipoprotein	2392314..2393636		+	No	146-end	Yes	G	G	G	A	A	A	A	A	A	A	A	A	A	A	A	A	A	A	A	A	A	A	A	A	A	A	A	A	A	A	A	A	A
2393637	G->C	Yes	T	S	ACC	AGC	BP2272	951	-	transposase	complement(2393633..2394583)		-	No	Tohama I	Yes	G	C	C	C	C	C	C	C	C	C	C	C	C	C	C	C	C	C	C	C	C	C	C	C	C	C	C	C	C	C	C	C	C
2395800	G->A	Yes	R	R	CGC	CGT	BP2274	1023	-	putative periplasmic protein	complement(2395113..2396135)		-	Yes	154	No	G	G	G	G	G	G	G	A	G	G	G	G	G	G	G	G	G	G	G	G	G	G	G	G	G	G	G	G	G	G	G	G	G
2398173	C->A	Yes	R	L	CGC	CTC	BP2276	1698	-	putative ABC transport permease	complement(2397011..2398708)		-	No	Tohama I	Yes	C	A	A	A	A	A	A	A	A	A	A	A	A	A	A	A	A	A	A	A	A	A	A	A	A	A	A	A	A	A	A	A	A
2416552	G->A	Yes	D	N	GAC	AAC	BP2293	1575	-	putative solute-binding transport protein (periplasmic)	2415325..2416899		+	No	Clade 4	No	G	G	G	G	G	G	G	G	G	G	G	G	G	G	G	G	A	A	G	G	G	G	G	G	G	G	G	G	G	G	G	G	G
2421479	T->G	No|intergenic					Bp2298p								Tohama I	Yes	T	N	N	G	N	G	N	N	N	G	N	N	N	N	N	N	N	N	N	N	N	N	N	G	G	N	N	G	N	N	N	N	N
2440713	G->A	Yes	G	G	GGC	GGT	BP2315	2748	vag8	autotransporter	complement(2438781..2441528)	Yes	-	Yes	90	No	G	G	G	G	G	G	G	G	G	G	G	G	G	G	A	G	G	G	G	G	G	G	G	G	G	G	G	G	G	G	G	G	G
2451524	G->A	Yes	A	V	GCG	GTG	BP2319	546	-	putative transcriptional regulator	complement(2451397..2451942)		-	No	61	No	G	G	G	G	G	G	G	G	G	A	G	G	G	G	G	G	G	G	G	G	G	G	G	G	G	G	G	G	G	G	G	G	G
2459954	G->A	Yes	G	E	GGG	GAG	BP2327	1677	-	putative outer membrane protein	2459746..2461362		+	No	146	Yes	G	G	G	A	G	G	G	G	G	G	G	G	G	G	G	G	G	G	G	G	G	G	G	G	G	G	G	G	G	G	G	G	G
2471200	C->A	Yes	G	C	GGC	TGC	BP2334	3885	-	putative ATP-dependent helicase	complement(2469806..2473690)		-	No	Tohama I	Yes	C	A	A	A	A	A	A	A	A	A	A	A	A	A	A	A	A	A	A	A	A	A	A	A	A	A	A	A	A	A	A	A	A
2479349	C->T	Yes	A	T	GCC	ACC	BP2340	1659	-	putative acyl-CoA dehydrogenase	complement(2479188..2480846)		-	No	Clade 4	No	C	C	C	C	C	C	C	C	C	C	C	C	C	C	C	C	T	T	C	C	C	C	C	C	C	C	C	C	C	C	C	C	C
2488085	T->C	Yes	Q	Q	CAA	CAG	BP2348	1104	-	putative polyamine transport protein	complement(2487059..2488162)		-	Yes	146-end	Yes	T	T	T	C	C	C	C	C	C	C	C	C	C	C	C	C	C	C	C	C	C	C	C	C	C	C	C	C	C	C	C	C	C
2492505	A->G	Yes	R	R	CGA	CGG	BP2352	975	-	putative periplasmic substrate-binding transport protein	2492101..2493075		+	Yes	Tohama I	Yes	A	G	G	G	G	G	G	G	G	G	G	G	G	G	G	G	G	G	G	G	G	G	G	G	G	G	G	G	G	G	G	G	G
2494541	C->A	Yes	I	I	ATC	ATA	BP2354	1278	-	putative inner membrane protein	2493702..2494979		+	Yes	70	No	C	C	C	C	C	C	C	C	C	C	C	C	C	C	C	C	C	C	A	C	C	C	C	C	C	C	C	C	C	C	C	C	C
2495944	G->T	Yes	Q	H	CAG	CAT	BP2355	951	-	transposase	2495078..2496028		+	No	multiple	Yes	G	N	N	N	N	N	N	T	N	T	T	T	T	N	N	T	N	N	N	T	T	N	N	T	N	T	N	T	N	N	T	N	N
2497937	C->A	Yes	C	F	TGC	TTC	BP2358	1311	gltA	citrate synthase	complement(2497246..2498556)	Yes	-	No	Tohama I	Yes	C	A	A	A	A	A	A	A	A	A	A	A	A	A	A	A	A	A	A	A	A	A	A	A	A	A	A	A	A	A	A	A	A
2502010	A->C	Yes	F	C	TTC	TGC	BP2363	933	cybA	succinate dehydrogenase cytochrome B subunit	complement(2501757..2502170)		-	No	131	No	A	A	A	A	A	A	A	A	A	A	A	A	A	A	A	A	A	A	A	A	A	A	A	A	A	A	A	A	C	A	A	A	A
2505238	T->C	yes	V	A			BP2366	896		probable methylisocitrate lyase (pseudogene)			+	No	fim3-2	Yes	T	T	T	T	T	C	C	C	C	C	C	C	C	C	C	C	C	C	C	C	C	C	C	C	C	C	C	C	C	C	C	C	C
2515775	C->A	Yes	Y	STOP	TAC	TAA	BP2376		-	Conserved hypothetical protein	2515257..2516129		+	No	85-86	No	C	C	C	C	C	C	C	C	C	C	C	C	C	C	C	C	C	C	C	C	C	C	C	C	C	C	C	C	C	C	C	C	C
2515909	C->T	Yes	P	L	CCG	CTG	BP2376	873	-	Conserved hypothetical protein	2515257..2516129		+	No	36-124	No	C	C	C	C	C	C	C	C	C	C	C	C	C	C	C	C	C	C	C	C	C	C	C	C	C	C	C	C	C	C	C	C	C
2524670	C->T	Yes	D	N	GAC	AAC	BP2386	1287	eno	enolase	complement(2524215..2525501)	Yes	-	No	88-42	No	C	C	C	C	C	C	C	C	C	C	C	C	C	C	C	C	C	C	C	C	C	C	C	C	C	C	C	C	C	C	C	C	C
2543757	C->T	Yes	P	S	CCG	TCG	BP2403	1629	-	putative electron transfer flavoprotein-ubiquinone oxidoreductase	2542965..2544593		+	No	154	No	C	C	C	C	C	C	C	T	C	C	C	C	C	C	C	C	C	C	C	C	C	C	C	C	C	C	C	C	C	C	C	C	C
2545945	G->A	Yes	W	STOP	TGG	TAG	BP2405	1149	-	putative cytochrome p450 oxidoreductase	2545572..2546720		+	No	88-143	No	G	G	G	G	G	G	G	G	G	G	G	G	G	G	G	G	G	G	G	G	G	G	G	G	G	G	G	G	G	G	G	G	G
2548865	G->T	Yes	L	M	CTG	ATG	BP2408	891	-	putative integral membrane protein	complement(2548134..2549024)		-	No	91	No	G	G	G	G	G	G	G	G	G	G	G	G	G	G	G	G	G	G	G	T	G	G	G	G	G	G	G	G	G	G	G	G	G
2556287	G->A	Yes	L	L	CTG	TTG	BP2414	342	-	Conserved hypothetical protein	complement(2555988..2556329)		-	Yes	154	No	G	G	G	G	G	G	G	A	G	G	G	G	G	G	G	G	G	G	G	G	G	G	G	G	G	G	G	G	G	G	G	G	G
2558163	C->A	Yes	V	L	GTG	TTG	BP2416	954	-	putative LysR-family transcriptional regulator	complement(2557585..2558538)		-	No	Tohama I	Yes	C	A	A	A	A	A	A	A	A	A	A	A	A	A	A	A	A	A	A	A	A	A	A	A	A	A	A	A	A	A	A	A	A
2562909	A->G	Yes	V	A	GTG	GCG	BP2420	1113	-	putative integral membrane protein	complement(2562491..2563603)		-	No	85	No	A	A	A	A	A	A	A	A	A	A	A	A	A	A	A	A	A	A	A	A	A	A	A	A	A	A	A	A	A	A	A	A	A
2571837	C->T	Yes	A	T	GCG	ACG	BP2428	936	-	LysR-family transcriptional regulator	complement(2571046..2571981)		-	No	Clade8	Yes	C	C	C	C	C	C	C	C	C	C	C	C	C	C	C	C	C	C	C	C	C	C	C	C	C	C	C	C	C	C	C	C	C
2571895	C->A	Yes	A	A	GCG	GCT	BP2428		-	LysR-family transcriptional regulator	complement(2571046..2571981)		-	Yes	Clade 7	No	C	C	C	C	C	C	C	C	C	C	C	C	C	C	C	C	C	C	C	C	C	C	C	C	C	C	C	C	C	C	C	A	A
2573337	G->A	Yes	A	A	GCC	GCT	BP2430	891	-	GTP-binding protein	complement(2572566..2573456)		-	Yes	152	No	G	G	G	G	G	G	G	G	G	G	G	G	G	G	G	G	G	G	G	G	G	G	G	G	G	G	G	G	G	G	G	G	G
2574919	G->A	Yes	D	D	GAC	GAT	BP2432	885	lep	signal peptidase I	complement(2574220..2575104)	Yes	-	Yes	161	No	G	G	G	G	G	G	G	G	G	G	G	G	G	G	G	G	G	G	G	G	G	G	G	G	G	G	G	G	G	G	G	G	G
2581557	T->C	Yes	P	P	CCA	CCG	BP2439	1230	fabF	3-oxoacyl-[acyl-carrier-protein] synthase II	complement(2581245..2582474)	Yes	-	Yes	Tohama I	Yes	T	C	C	C	C	C	C	C	C	C	C	C	C	C	C	C	C	C	C	C	C	C	C	C	C	C	C	C	C	C	C	C	C
2589013	C->G	Yes	P	R	CCC	CGC	BP2448	711	-	conserved hypothetical protein	2588490..2589200		+	No	50-end	No	C	C	C	C	C	C	C	C	C	C	C	C	C	C	C	C	C	C	C	C	C	C	C	C	C	C	C	C	C	C	C	C	C
2590095	T->G	Yes	V	G			BP2450	1758		putative membrane protein (pseudogene)				No	145	Yes	T	T	T	T	G	T	T	T	T	T	T	T	T	T	T	T	T	T	T	T	T	T	T	T	T	T	T	T	T	T	T	T	T
2597607	G->A	No|intergenic					BP2456P		alcAP						80-154	No	G	G	G	G	G	A	A	A	G	G	G	G	G	G	G	G	G	G	G	G	G	G	G	G	G	G	G	G	G	G	G	G	G
2610433	C->T	Yes	P	S	CCG	TCG	BP2465	723	-	hypothetical protein	2609881..2610603		+	No	146	No	C	C	C	T	C	C	C	C	C	C	C	C	C	C	C	C	C	C	C	C	C	C	C	C	C	C	C	C	C	C	C	C	C
2611060	G->A	Yes	A	T	GCG	ACG	BP2467	516	-	hypothetical protein	2610874..2611389		+	No	136-138	No	G	A	A	G	G	G	G	G	G	G	G	G	G	G	G	G	G	G	G	G	G	G	G	G	G	G	G	G	G	G	G	G	G
2620617	A->G	No|intergenic					BP2477P								161	Yes	A	A	A	A	N	N	N	N	N	N	A	N	N	N	N	N	N	N	N	N	N	N	N	N	N	N	N	N	N	N	N	N	N
2620618	C->A	No|intergenic					BP2477P								161	Yes	C	C	C	C	N	N	N	N	N	N	C	N	N	N	N	N	N	N	N	N	N	N	N	N	N	N	N	N	N	N	N	N	N
2628946	T->C	Yes	I	T	ATC	ACC	BP2482	600	kdpC	potassium-transporting ATPase C chain	2628702..2629301		+	No	Tohama I	Yes	T	C	C	C	C	C	C	C	C	C	C	C	C	C	C	C	C	C	C	C	C	C	C	C	C	C	C	C	C	C	C	C	C
2632911	C->A	Yes	Q	H	CAG	CAT	BP2485	951	-	transposase	complement(2632827..2633777)		-	No	145-end	Yes	C	N	N	C	A	N	N	N	N	N	A	N	A	A	A	A	N	N	A	N	A	A	A	N	N	A	N	A	N	N	A	N	N
2636646	C->T	Yes	V	M	GTG	ATG	BP2488	1257	icd	isocitrate dehydrogenase [NADP]	complement(2636446..2637702)	Yes	-	No	87	Yes	C	C	C	C	C	C	C	C	C	C	C	C	C	T	C	C	C	C	C	C	C	C	C	C	C	C	C	C	C	C	C	C	C
2637814	C->T	No|intergenic					BP2488P / BP2489P		icdP / -						82	No	C	C	C	C	C	C	C	C	C	C	C	C	C	C	C	C	C	C	C	C	C	C	C	C	C	C	C	C	C	C	C	T	C
2639235	A->G	No|intergenic					BP2491/BP2492P								124	Yes	A	A	A	A	N	N	N	N	N	N	N	N	N	N	N	N	N	N	N	N	N	N	N	N	N	N	N	N	N	N	N	N	N
2639236	C->A	No|intergenic					BP2491/BP2492P								124	Yes	C	C	C	C	N	N	N	N	N	N	N	N	N	N	N	N	N	N	N	N	N	N	N	N	N	N	N	N	N	N	N	N	N
2651008	G->A	Yes	T	I	ACC	ATC	BP2502	243	-	hypothetical protein	complement(2650959..2651201)		-	No	145-end	Yes	G	G	G	G	A	A	A	A	A	A	A	A	A	A	A	A	A	A	A	A	A	A	A	A	A	A	A	A	A	A	A	A	A
2662594	T->G	Yes	I	L	ATC	CTC	BP2513	987	-	putative exported protein	complement(2661794..2662780)		-	No	Tohama I	Yes	T	G	G	G	G	G	G	G	G	G	G	G	G	G	G	G	G	G	G	G	G	G	G	G	G	G	G	G	G	G	G	G	G
2675012	T->C	No|intergenic					BP2524P								155	Yes	T	T	T	T	T	T	T	T	T	T	T	T	T	T	T	T	T	T	N	N	N	N	N	N	C	N	T	T	T	T	T	T	T
2689908	C->T	Yes	V	I	GTC	ATC	BP2538	720	-	integral membrane protein	complement(2689447..2690166)		-	No	146	Yes	C	C	C	T	C	C	C	C	C	C	C	C	C	C	C	C	C	C	C	C	C	C	C	C	C	C	C	C	C	C	C	C	C
2690411	G->A	Yes	H	Y	CAC	TAC	BP2539	696	-	integral membrane protein	complement(2690325..2691020)		-	No	Clade 7	Yes	G	G	G	G	G	G	G	G	G	G	G	G	G	G	G	G	G	G	G	G	G	G	G	G	G	G	G	G	G	G	G	A	A
2700703	G->A	Yes	D	N	GAC	AAC	BP2548	1359	-	two-component system histidine kinase	2700340..2701698		+	No	clade 5	No	G	G	G	G	G	G	G	G	G	G	G	G	G	G	G	G	G	G	A	A	A	A	A	A	A	A	G	G	G	G	G	G	G
2731525	G->T	Yes					BP2580	1449	-	putative GntR-family regulatory protein					Tohama I	Yes	G	T	T	T	T	T	T	T	T	T	T	T	T	T	T	T	T	T	T	T	T	T	T	T	T	T	T	T	T	T	T	T	T
2733330	T->C	Yes	E	E	GAA	GAG	BP2581	282	-	hypothetical protein	complement(2733099..2733380)		-	Yes	146	No	T	T	T	C	T	T	T	T	T	T	T	T	T	T	T	T	T	T	T	T	T	T	T	T	T	T	T	T	T	T	T	T	T
2736088	G->A	Yes	V	V	GTC	GTT	BP2585	639	-	DedA-family integral membrane protein	complement(2736037..2736675)		-	Yes	146-end	Yes	G	G	G	A	A	A	A	A	A	A	A	A	A	A	A	A	A	A	A	A	A	A	A	A	A	A	A	A	A	A	A	A	A
2742709	C->T	Yes	R	H	CGC	CAC	BP2591	1635	-	ABC transport protein, ATP-binding component	complement(2741322..2742956)		-	No	148-130	No	C	C	C	C	C	C	C	C	C	C	C	C	C	C	C	C	C	C	C	C	C	C	C	C	C	C	C	C	C	C	C	C	C
2746708	G->A	Yes					BP2595	1274		putative peptidase (Pseudogene)					161-end	No	G	G	G	G	G	G	G	G	G	G	G	G	G	G	G	G	G	G	G	G	G	G	G	G	G	G	G	G	G	G	G	G	G
2747934	G->T	Yes	L	I	CTC	ATC	BP2596	471	-	Conserved hypothetical protein	complement(2747740..2748210)		-	No	88-42	No	G	G	G	G	G	G	G	G	G	G	G	G	G	G	G	G	G	G	G	G	G	G	G	G	G	G	G	G	G	G	G	G	G
2775385	G->A	Yes	E	E	GAG	GAA	BP2621	690	-	putative TetR-family transcriptional regulator	2775218..2775907		+	Yes	85-130	No	G	G	G	G	G	G	G	G	G	G	G	G	G	G	G	G	G	G	G	G	G	G	G	G	G	G	G	G	G	G	G	G	G
2778352	G->A	Yes	H	H	CAC	CAT	BP2624	1593	guaA	GMP synthase [glutamine-hydrolyzing]	complement(2777956..2779548)		-	Yes	Clade 2	No	G	G	G	G	G	G	G	G	G	G	G	A	A	G	G	G	G	G	G	G	G	G	G	G	G	G	G	G	G	G	G	G	G
2790710	G->C	Yes	P	A	CCC	GCC	BP2633	1125	-	possible exonuclease	complement(2789685..2790809)		-	No	Tohama I	Yes	G	C	C	C	C	C	C	C	C	C	C	C	C	C	C	C	C	C	C	C	C	C	C	C	C	C	C	C	C	C	C	C	C
2798370	G->T	Yes					BP2641	892		putative ABC transport protein, inner membrane component (pseudogene)					90	No	G	G	G	G	G	G	G	G	G	G	G	G	G	G	T	G	G	G	G	G	G	G	G	G	G	G	G	G	G	G	G	G	G
2807372	A->C	Yes	F	V	TTT	GTT	BP2648	1383	-	Conserved hypothetical protein	complement(2806155..2807537)		-	No	112	No	A	A	A	A	A	A	A	A	A	A	A	C	A	A	A	A	A	A	A	A	A	A	A	A	A	A	A	A	A	A	A	A	A
2819587	C->T	Yes	A	V	GCC	GTC	BP2664	474	-	putative MarR-family transcriptional regulator	2819499..2819972		+	No	141-127	No	C	C	C	C	C	C	C	C	C	C	C	C	C	C	C	C	C	C	C	C	C	C	C	C	C	C	T	T	C	C	C	C	C
2826237	G->A	Yes	H	Y	CAC	TAC	BP2667	7662	fhaS	adhesin	complement(2822059..2829720)		-	No	87	Yes	G	G	G	G	G	G	G	G	G	G	G	G	G	A	G	G	G	G	G	G	G	G	G	G	G	G	G	G	G	G	G	G	G
2846574	G->A	Yes					BP2680	1049	paaE	probable phenylacetic acid degradation NADH oxidoreductase (pseudogene)					49	No	G	G	G	G	G	G	G	G	G	G	A	G	G	G	G	G	G	G	G	G	G	G	G	G	G	G	G	G	G	G	G	G	G
2849677	A->G	No|intergenic					BP2684P / BP2685P		paaAP / paaXP						Tohama I	Yes	A	G	G	G	G	G	G	G	G	G	G	G	G	G	G	G	G	G	G	G	G	G	G	G	G	G	G	G	G	G	G	G	G
2854457	T->C	Yes					BP2689A	266		transposase fragment for IS1663 (pseudogene)					Tohama I	Yes	T	C	C	C	C	C	C	C	C	C	C	C	C	C	C	C	C	C	C	C	C	C	C	C	C	C	C	C	C	C	C	C	C
2855571	C->T	Yes	R	H	CGC	CAC	BP2691	954	-	ABC-transport protein, inner membrane component	complement(2855297..2856250)		-	No	Clade 2	Yes	C	C	C	C	C	C	C	C	C	C	C	T	T	C	C	C	C	C	C	C	C	C	C	C	C	C	C	C	C	C	C	C	C
2859566	T->C	No|intergenic					BP2694P								88-42	No	T	T	T	T	T	T	T	T	T	T	T	T	T	T	T	T	T	T	T	T	T	T	T	T	T	T	T	T	T	T	T	T	T
2870690	G->A	No|intergenic					BP2704/BP2705P								146	No	G	G	G	A	G	G	G	G	G	G	G	G	G	G	G	G	G	G	G	G	G	G	G	G	G	G	G	G	G	G	G	G	G
2870692	T->G	No|intergenic					BP2704/BP2705P								53-end	Yes	T	N	N	T	N	N	N	N	N	N	N	N	G	N	N	N	N	N	G	N	N	N	N	N	N	N	N	N	N	N	G	N	N
2874604	C->G	Yes	K	N	AAG	AAC	BP2708	522	moaB	molybdenum Cofactor biosynthesis protein	complement(2874367..2874888)		-	No	146	No	C	C	C	G	C	C	C	C	C	C	C	C	C	C	C	C	C	C	C	C	C	C	C	C	C	C	C	C	C	C	C	C	C
2879950	G->A	Yes	L	L	CTG	CTA	BP2713	885	-	putative hydrolase	2879705..2880589		+	Yes	Tohama I	Yes	G	A	A	A	A	A	A	A	A	A	A	A	A	A	A	A	A	A	A	A	A	A	A	A	A	A	A	A	A	A	A	A	A
2881031	G->A	No|intergenic					BP2714P / BP2715P		- / -						146	Yes	G	G	G	A	G	G	G	G	G	G	G	G	G	G	G	G	G	G	G	G	G	G	G	G	G	G	G	G	G	G	G	G	G
2881290	C->T	Yes	A	V	GCC	GTC	BP2715	504	-	AhpC/TSA-family protein	2881277..2881780		+	No	Tohama I	Yes	C	T	T	T	T	T	T	T	T	T	T	T	T	T	T	T	T	T	T	T	T	T	T	T	T	T	T	T	T	T	T	T	T
2885336	T->C	No|intergenic					BP2718P / BP2719P								152	No	T	T	T	T	T	T	T	T	T	T	T	T	T	T	T	T	T	T	T	T	T	T	T	T	T	T	T	T	T	T	T	T	T
2891938	A->G	Yes	K	E	AAA	GAA	BP2724	951	-	transposase	2891017..2891967		+	No	Tohama I	Yes	A	G	G	G	N	N	G	N	G	G	G	G	G	G	N	G	G	G	N	N	G	G	G	G	G	N	G	G	G	G	G	N	N
2921561	T->G	Yes	S	R	AGC	CGC	BP2751	1674	-	putative membrane protein	complement(2921352..2923025)		-	No	Tohama I	Yes	T	G	G	G	G	G	G	G	G	G	G	G	G	G	G	G	G	G	G	G	G	G	G	G	G	G	G	G	G	G	G	G	G
2932984	G->A	Yes	G	G	GGC	GGT	BP2755	5190	-	putative exported protein	complement(2928904..2934093)		-	Yes	61	No	G	G	G	G	G	G	G	G	G	A	G	G	G	G	G	G	G	G	G	G	G	G	G	G	G	G	G	G	G	G	G	G	G
2953070	G->A	Yes	G	W			BP2779	1742		putative dihydroxy-acid dehydratase (pseudogene)				No	80-81	No	G	G	G	G	G	A	A	G	G	G	G	G	G	G	G	G	G	G	G	G	G	G	G	G	G	G	G	G	G	G	G	G	G
2955458	G->A	Yes	A	V	GCG	GTG	BP2780	1113	-	putative malate dehydrogenase	complement(2954659..2955771)		-	No	Clade 2	No	G	G	G	G	G	G	G	G	G	G	G	A	A	G	G	G	G	G	G	G	G	G	G	G	G	G	G	G	G	G	G	G	G
2963939	C->T	Yes	R	C	CGC	TGC	BP2788	1689	-	hypothetical protein	2962520..2964208		+	No	Tohama I	Yes	C	T	T	T	T	T	T	T	T	T	T	T	T	T	T	T	T	T	T	T	T	T	T	T	T	T	T	T	T	T	T	T	T
2964398	G->A	Yes	G	D	GGC	GAC	BP2789	978	-	Conserved hypothetical protein	2964313..2965290		+	No	36	No	G	G	G	G	G	G	G	G	G	G	G	G	G	G	G	G	G	G	G	G	G	G	G	G	G	G	G	G	G	G	G	G	G
2973877	A->C	Yes	P	P	CCT	CCG	BP2799	912	-	probable geranyltranstransferase	complement(2973355..2974266)		-	Yes	Tohama I	Yes	A	C	C	C	C	C	C	C	C	C	C	C	C	C	C	C	C	C	C	C	C	C	C	C	C	C	C	C	C	C	C	C	C
2975767	A->G	Yes	T	A	ACC	GCC	BP2802	966	-	putative exported protein	2975629..2976594		+	No	33-104	No	A	A	A	A	A	A	A	A	A	A	A	A	A	A	A	A	A	A	A	A	A	A	A	A	A	A	A	A	A	A	A	A	A
2979159	T->C	Yes					BP2805	951		transposase (Pseudogene)					multiple	Yes	T	N	C	T	T	T	T	T	T	T	T	T	T	T	T	T	T	T	T	T	T	T	T	T	T	T	T	T	T	T	T	T	C
2989931	A->G	Yes					BP2814	1853		conserved hypothetical protein (pseudogene)					154	No	A	A	A	A	A	A	A	G	A	A	A	A	A	A	A	A	A	A	A	A	A	A	A	A	A	A	A	A	A	A	A	A	A
2996844	C->A	Yes					BP2819	951		transposase					148	No	C	C	C	C	C	C	C	C	C	C	C	C	C	C	C	C	C	C	C	C	C	C	C	C	C	C	C	C	C	C	C	C	C
2996916	A->C	Yes	R	R	CGA	CGC	BP2819		-	transposase	2996875..2997825		+	Yes	148	No	A	A	A	A	A	A	A	A	A	A	A	A	A	A	A	A	A	A	A	A	A	A	A	A	A	A	A	A	A	A	A	A	A
2996942	T->C	Yes	V	A	GTC	GCC	BP2819		-	transposase	2996875..2997825		+	No	148	Yes	T	T	T	T	T	T	T	T	T	T	T	T	T	T	T	T	T	T	T	T	T	T	T	T	T	T	T	T	T	T	T	T	T
2998921	C->T	Yes	A	V	GCG	GTG	BP2820	1155	-	putative alcohol dehydrogenase	2997900..2999054		+	No	Tohama I	Yes	C	T	T	T	T	T	T	T	T	T	T	T	T	T	T	T	T	T	T	T	T	T	T	T	T	T	T	T	T	T	T	T	T
3008968	A->G	Yes	S	G			BP2833	971		putative membrane protein (pseudogene)				No	Tohama I	Yes	A	G	G	G	G	G	G	G	G	G	G	G	G	G	G	G	G	G	G	G	G	G	G	G	G	G	G	G	G	G	G	G	G
3021346	G->A	Yes					BP2846	1182		putative exported protein (pseudogene)					62	No	G	G	G	G	G	G	G	G	G	G	G	G	G	G	G	A	G	G	G	G	G	G	G	G	G	G	G	G	G	G	G	G	G
3023386	G->A	Yes	A	V			BP2846			putative exported protein (pseudogene)				No	Tohama I	Yes	G	A	A	A	A	A	A	A	A	A	A	A	A	A	A	A	A	A	A	A	A	A	A	A	A	A	A	A	A	A	A	A	A
3024322	A->G	No|intergenic					BP2847/BP2848P								82	No	A	A	A	A	A	A	A	A	A	A	A	A	A	A	A	A	A	A	A	A	A	A	A	A	A	A	A	A	A	A	A	G	A
3024323	C->A	No|intergenic					BP2847/BP2848P								82	Yes	C	C	C	C	C	C	C	C	C	C	C	C	C	C	C	C	C	C	C	C	C	C	C	C	C	C	C	C	C	C	C	A	C
3027750	T->C	Yes	A	A	GCT	GCC	BP2851	1110	-	outer membrane porin protein precursor	3027685..3028794		+	Yes	Tohama I	Yes	T	C	C	C	C	C	C	C	C	C	C	C	C	C	C	C	C	C	C	C	C	C	C	C	C	C	C	C	C	C	C	C	C
3030524	T->C	Yes	A	A	GCA	GCG	BP2853	783	-	probable short chain dehydrogenase	complement(3029999..3030781)		-	Yes	Tohama I	Yes	T	C	C	C	C	C	C	C	C	C	C	C	C	C	C	C	C	C	C	C	C	C	C	C	C	C	C	C	C	C	C	C	C
3034945	A->G	Yes	A	A	GCT	GCC	BP2858	1200	tyrB	aromatic-amino-acid aminotransferase	complement(3034912..3036111)		-	Yes	Tohama I	Yes	A	G	G	G	G	G	G	G	G	G	G	G	G	G	G	G	G	G	G	G	G	G	G	G	G	G	G	G	G	G	G	G	G
3039407	C->G	Yes	V	L	GTT	CTT	BP2861	951	-	transposase	complement(3039396..3040346)		-	No	Tohama I	Yes	C	G	G	G	G	G	G	G	G	G	G	G	G	G	G	G	G	G	G	G	G	G	G	G	G	G	G	G	G	G	G	G	G
3039408	T->A	Yes	T	T	ACA	ACT	BP2861		-	transposase	complement(3039396..3040346)		-	Yes	Tohama I	Yes	T	A	A	A	A	A	A	A	A	A	A	A	A	A	A	A	A	A	A	A	A	A	A	A	A	A	A	A	A	A	A	A	A
3039409	G->T	Yes	T	K	ACA	AAA	BP2861		-	transposase	complement(3039396..3040346)		-	No	Tohama I	Yes	G	T	N	T	T	T	T	T	T	T	T	N	T	T	T	T	T	T	T	T	T	T	T	N	T	T	T	T	T	N	T	T	T
3055035	G->T	No|intergenic					BP2876P								85	No	G	G	G	G	G	G	G	G	G	G	G	G	G	G	G	G	G	G	G	G	G	G	G	G	G	G	G	G	G	G	G	G	G
3059526	G->A	Yes	G	S	GGC	AGC	BP2882	870	-	putative lysR-family transcriptional regulator	3059223..3060092		+	No	Clade 4	No	G	G	G	G	G	G	G	G	G	G	G	G	G	G	G	G	A	A	G	G	G	G	G	G	G	G	G	G	G	G	G	G	G
3060324	T->C	Yes	K	E			BP2883	237		putative NADH:flavin oxidoreductase (pseudogene)				No	Tohama I	Yes	T	C	C	C	C	C	C	C	C	C	C	C	C	C	C	C	C	C	C	C	C	C	C	C	C	C	C	C	C	C	C	C	C
3070796	T->C	No|intergenic					BP2894P / BP2895P		- / tctCP						Tohama I	Yes	T	C	C	C	C	C	C	C	C	C	C	C	C	C	C	C	C	C	C	C	C	C	C	C	C	C	C	C	C	C	C	C	C
3089988	C->T	Yes	P	L	CCC	CTC	BP2907		fhaL	adhesin	3085865..3098455		+	No	124	No	C	C	C	C	C	C	C	C	C	C	C	C	C	C	C	C	C	C	C	C	C	C	C	C	C	C	C	C	C	C	C	C	C
3092423	G->A	Yes	A	T	GCC	ACC	BP2907	12591	fhaL	adhesin	3085865..3098455		+	No	147	No	G	G	G	G	G	G	G	G	G	G	G	G	A	G	G	G	G	G	G	G	G	G	G	G	G	G	G	G	G	G	G	G	G
3098624	G->A	Yes	R	R	CGC	CGT	BP2908	1074	aroG	phospho-2-dehydro-3-deoxyheptonate aldolase, Phe-sensitive	complement(3098477..3099550)	Yes	-	Yes	82	No	G	G	G	G	G	G	G	G	G	G	G	G	G	G	G	G	G	G	G	G	G	G	G	G	G	G	G	G	G	G	G	A	G
3111627	A->G	Yes	V	A	GTC	GCC	BP2922	2199	bfrG	putative TonB-dependent receptor	complement(3110909..3113107)		-	No	49	Yes	A	A	A	A	A	A	A	A	A	A	G	A	A	A	A	A	A	A	A	A	A	A	A	A	A	A	A	A	A	A	A	A	A
3122367	T->C	Yes	T	A	ACG	GCG	BP2933	915	cyoA	putative ubiquinol oxidase polypeptide II	complement(3121471..3122385)		-	No	Tohama I	Yes	T	C	C	C	C	C	C	C	C	C	C	C	C	C	C	C	C	C	C	C	C	C	C	C	C	C	C	C	C	C	C	C	C
3123720	C->A	Yes	A	S	GCG	TCG	BP2935	1212	-	putative two component system, histidine kinase	complement(3123145..3124356)		-	No	146-end	Yes	C	C	C	A	A	A	A	A	A	A	A	A	A	A	A	A	A	A	A	A	A	A	A	A	A	A	A	A	A	A	A	A	A
3125619	G->A	No|intergenic					BP2936P								Tohama I	Yes	G	A	A	A	A	A	A	A	A	A	A	A	A	A	A	A	A	A	A	A	A	A	A	A	A	A	A	A	A	A	A	A	A
3125620	A->G	No|intergenic					BP2936P								Tohama I	Yes	A	G	G	G	G	G	G	G	G	G	G	G	G	G	G	G	G	G	G	G	G	G	G	G	G	G	G	G	G	G	G	G	G
3125953	G->A	Yes	A	V	GCG	GTG	BP2937	867	-	Conserved hypothetical protein	complement(3125697..3126563)		-	No	86	No	G	G	G	G	G	G	G	G	G	G	G	G	G	G	G	G	G	G	G	G	G	G	G	G	G	G	G	G	G	G	G	G	G
3140208	G->A	Yes	L	L	CTG	TTG	BP2952	1248	glyA	serine hydroxymethyltransferase	complement(3139339..3140586)		-	Yes	101	No	G	G	G	G	G	G	G	G	G	G	G	G	G	G	G	G	G	G	G	G	G	G	G	G	G	G	G	G	G	G	G	G	G
3143948	A->T	No|intergenic					BP2956P								Clade 4	No	A	A	A	A	A	A	A	A	A	A	A	A	A	A	A	A	T	T	A	A	A	A	A	A	A	A	A	A	A	A	A	A	A
3161770	C->T	No|intergenic					BP2974P / BP2975P								Tohama I	Yes	C	T	T	T	T	T	T	T	T	T	T	T	T	T	T	T	T	T	T	T	T	T	T	T	T	T	T	T	T	T	T	T	T
3162545	A->G	No|intergenic					BP2976P								128	No	A	A	A	A	A	A	A	A	A	A	A	A	A	A	A	A	A	A	A	A	A	A	G	A	A	A	A	A	A	A	A	A	A
3162546	A->C	No|intergenic					BP2976P								multiple	Yes	A	A	A	C	N	N	N	N	N	C	C	N	N	C	N	C	N	N	N	N	N	N	A	C	C	N	C	C	N	C	C	C	C
3169950	G->T	No|intergenic					BP2981/BP2982P								2	No	G	G	G	G	G	G	G	G	G	G	G	G	G	G	G	G	G	G	G	G	G	G	G	G	G	G	G	G	G	G	G	G	G
3180300	A->G	Yes	F	L	TTC	CTC	BP2987	1464	dltA	putative D-alanine-D-alanyl carrier protein ligase	complement(3179590..3181053)		-	No	Clade 3	No	A	A	A	A	A	A	A	A	A	A	A	A	A	A	G	G	A	A	A	A	A	A	A	A	A	A	A	A	A	A	A	A	A
3181172	C->A	Yes	A	A	GCG	GCT	BP2988	1128	dltB	putative protein involved in the transfer of D-alanine into teichoic acids	complement(3181064..3182191)		-	Yes	Tohama I	Yes	C	A	A	A	A	A	A	A	A	A	A	A	A	A	A	A	A	A	A	A	A	A	A	A	A	A	A	A	A	A	A	A	A
3193746	A->G	Yes	T	A	ACC	GCC	BP3002	1884	-	Conserved hypothetical protein	3192771..3194654		+	No	Tohama I	Yes	A	G	G	G	G	G	G	G	G	G	G	G	G	G	G	G	G	G	G	G	G	G	G	G	G	G	G	G	G	G	G	G	G
3193874	C->T	Yes	A	A	GCC	GCT	BP3002		-	Conserved hypothetical protein	3192771..3194654		+	Yes	101	No	C	C	C	C	C	C	C	C	C	C	C	C	C	C	C	C	C	C	C	C	C	C	C	C	C	C	C	C	C	C	C	C	C
3196522	T->C	No|intergenic					BP3005P								145	Yes	T	N	N	C	N	N	N	N	N	N	N	N	N	N	N	N	N	N	N	N	N	N	N	N	N	N	N	N	N	N	N	N	N
3221186	C->T	Yes	D	N	GAC	AAC	BP3027	2838	murE	Possible murein precusor biosynthesis bifunctional protein	complement(3220467..3223304)		-	No	146	Yes	C	C	C	T	C	C	C	C	C	C	C	C	C	C	C	C	C	C	C	C	C	C	C	C	C	C	C	C	C	C	C	C	C
3223630	C->T	Yes	A	T	GCC	ACC	BP3028	1731	ftsI	peptidoglycan synthetase FtsI precursor	complement(3223301..3225031)		-	No	152	No	C	C	C	C	C	C	C	C	C	C	C	C	C	C	C	C	C	C	C	C	C	C	C	C	C	C	C	C	C	C	C	C	C
3228373	G->T	Yes	R	L	CGC	CTC	BP3034	1809	-	putative ABC transporter ATP-binding protein	3227640..3229448		+	No	145	No	G	G	G	G	T	G	G	G	G	G	G	G	G	G	G	G	G	G	G	G	G	G	G	G	G	G	G	G	G	G	G	G	G
3239465	T->C	No|intergenic					BPr09P								146-end	Yes	T	T	T	C	C	C	C	C	C	C	C	C	C	C	C	C	C	C	C	C	C	C	C	C	C	C	C	C	C	C	C	C	C
3241138	T->G	Yes	L	L	CTT	CTG	BP3040	1113	bllY	putative hemolysin	3240260..3241372	Yes	+	Yes	Tohama I	Yes	T	G	G	G	G	G	G	G	G	G	G	G	G	G	G	G	G	G	G	G	G	G	G	G	G	G	G	G	G	G	G	G	G
3248011	C->G	No|intergenic					BP3049P								clade 5	Yes	C	N	N	G	N	G	N	N	G	G	G	N	G	N	N	N	G	G	A	A	A	N	A	A	A	A	N	G	G	N	N	G	G
3248012	C->A	No|intergenic					BP3049P								multiple	Yes	C	C	C	A	C	A	N	N	A	A	A	N	A	C	N	N	N	N	C	C	C	C	C	C	C	C	N	A	A	N	N	A	A
3248964	G->A	Yes	E	K	GAA	AAA	BP3049	951	-	transposase	3248043..3248993		+	No	154	No	G	G	G	G	G	G	G	A	G	G	G	G	G	G	G	G	G	G	G	G	G	G	G	G	G	G	G	G	G	G	G	G	G
3255784	G->A	Yes	A	T	GCC	ACC	BP3056	753	ung	uracil-DNA glycosylase	3255619..3256371		+	No	89-58	No	G	G	G	G	G	G	G	G	G	G	G	G	G	G	G	G	G	G	G	G	G	G	G	G	G	G	G	G	G	A	A	G	G
3260282	C->T	Yes	L	L	CTG	CTA	BP3059	1095	cca	tRNA nucleotidyltransferase	complement(3259628..3260722)		-	Yes	146-end	Yes	C	C	C	T	T	T	T	T	T	T	T	T	T	T	T	T	T	T	T	T	T	T	T	T	T	T	T	T	T	T	T	T	T
3261292	C->T	Yes	E	E	GAG	GAA	BP3060	2064	-	putative transglycosylase	complement(3260719..3262782)		-	Yes	Clade 7	No	C	C	C	C	C	C	C	C	C	C	C	C	C	C	C	C	C	C	C	C	C	C	C	C	C	C	C	C	C	C	C	T	T
3263174	C->T	Yes	T	M	ACG	ATG	BP3061	681	-	5-formyltetrahydrofolate cyclo-ligase family protein	3262858..3263538		+	No	2-end	No	C	C	C	C	C	C	C	C	C	C	C	C	C	C	C	C	C	C	C	C	C	C	C	C	C	C	C	C	C	C	C	C	C
3263622	A->C	No|intergenic					BP3062P								145-end	Yes	A	A	A	A	C	C	C	C	C	C	C	C	C	C	C	C	C	C	C	C	C	C	C	C	C	C	C	C	C	C	C	C	C
3268291	G->T	No|intergenic					BP3065P								multiple	Yes	G	G	G	N	N	N	N	N	N	N	N	N	N	N	N	N	N	N	N	N	N	N	N	N	N	N	N	N	N	N	N	T	N
3268292	T->C	No|intergenic					BP3065P								146-end	Yes	T	T	T	C	N	N	N	N	N	N	N	N	N	N	N	N	N	N	N	N	N	N	N	N	N	N	N	C	N	N	N	C	N
3283178	C->T	Yes	P	P	CCG	CCA	BP3080	936	-	putative periplasmic solute binding protein	complement(3282434..3283369)		-	Yes	43	No	C	C	C	C	C	C	C	C	C	C	C	C	C	C	C	C	C	C	C	C	C	C	C	C	C	C	C	C	C	C	C	C	T
3287749	G->T	Yes	T	T	ACG	ACT	BP3085	465	dksA	putative dnaK suppressor protein	3287348..3287812		+	Yes	161-end	No	G	G	G	G	G	G	G	G	G	G	G	G	G	G	G	G	G	G	G	G	G	G	G	G	G	G	G	G	G	G	G	G	G
3292800	G->A	Yes	V	M	GTG	ATG	BP3092	1575	-	putative phospholipase D protein	3292425..3293999		+	No	Tohama I	Yes	G	A	A	A	A	A	A	A	A	A	A	A	A	A	A	A	A	A	A	A	A	A	A	A	A	A	A	A	A	A	A	A	A
3296746	C->T	Yes	A	T	GCC	ACC	BP3096	885	-	putative hydrolase	complement(3296720..3297604)		-	No	154	No	C	C	C	C	C	C	C	T	C	C	C	C	C	C	C	C	C	C	C	C	C	C	C	C	C	C	C	C	C	C	C	C	C
3297373	G->A	Yes	R	W	CGG	TGG	BP3096		-	putative hydrolase	complement(3296720..3297604)		-	No	146	Yes	G	G	G	A	G	G	G	G	G	G	G	G	G	G	G	G	G	G	G	G	G	G	G	G	G	G	G	G	G	G	G	G	G
3304792	C->T	Yes	D	N	GAC	AAC	BP3106	1011	-	putative exported protein	complement(3304520..3305530)		-	No	145	No	C	C	C	C	T	C	C	C	C	C	C	C	C	C	C	C	C	C	C	C	C	C	C	C	C	C	C	C	C	C	C	C	C
3312605	G->A	Yes	SILLENT				BP3113	2079		putative DNA helicase (Pseudogene)				Yes	Tohama I	Yes	G	A	A	A	A	A	A	A	A	A	A	A	A	A	A	A	A	A	A	A	A	A	A	A	A	A	A	A	A	A	A	A	A
3313138	G->A	Yes	R	G			BP3113			putative DNA helicase (Pseudogene)				No	Tohama I	Yes	G	A	A	A	A	A	A	A	A	A	A	A	A	A	A	A	A	A	A	A	A	A	A	A	A	A	A	A	A	A	A	A	A
3320437	C->T	Yes	W	STOP	TGG	TGA	BP3117	3120	-	putative restriction endonuclease	complement(3319969..3323088)		-	No	33-104	No	C	C	C	C	C	C	C	C	C	C	C	C	C	C	C	C	C	C	C	C	C	C	C	C	C	C	C	C	C	C	C	C	C
3325277	C->T	Yes	A	T	GCG	ACG	BP3120	1128	-	putative integrase	complement(3324624..3325751)		-	No	80-81	No	C	C	C	C	C	T	T	C	C	C	C	C	C	C	C	C	C	C	C	C	C	C	C	C	C	C	C	C	C	C	C	C	C
3344486	C->T	Yes	R	H	CGC	CAC	BP3137	1323	-	putative two-component system sensor protein	complement(3343885..3345207)		-	No	146	Yes	C	C	C	T	C	C	C	C	C	C	C	C	C	C	C	C	C	C	C	C	C	C	C	C	C	C	C	C	C	C	C	C	C
3347952	C->T	Yes	V	V	GTG	GTA	BP3140	573	-	hypothetical protein	complement(3347439..3348011)		-	Yes	Tohama I	Yes	C	T	T	T	T	T	T	T	T	T	T	T	T	T	T	T	T	T	T	T	T	T	T	T	T	T	T	T	T	T	T	T	T
3368049	A->G	Yes	Q	R	CAG	CGG	BP3157	1326	-	omega-amino acid--pyruvate aminotransferase	3367802..3369127		+	No	90	No	A	A	A	A	A	A	A	A	A	A	A	A	A	A	G	A	A	A	A	A	A	A	A	A	A	A	A	A	A	A	A	A	A
3370356	C->T	Yes	SILLENT				BP3158	1459	mmsA	putative methylmalonate-semialdehyde dehydrogenase [acylating] (Pseudogene)				Yes	Clade 3	Yes	C	C	C	C	C	C	C	C	C	C	C	C	C	C	T	T	C	C	C	C	C	C	C	C	C	C	C	C	C	C	C	C	C
3370669	A->G	No|intergenic					BP3159P		-						Tohama I	Yes	A	G	G	G	G	G	G	G	G	G	G	G	G	G	G	G	G	G	G	G	G	G	G	G	G	G	G	G	G	G	G	G	G
3372358	G->A	Yes	G	D	GGC	GAC	BP3159	1566	-	putative extracellular solute-binding protein	3370905..3372470		+	No	152	No	G	G	G	G	G	G	G	G	G	G	G	G	G	G	G	G	G	G	G	G	G	G	G	G	G	G	G	G	G	G	G	G	G
3373536	G->A	Yes	R	H	CGC	CAC	BP3161	888	-	putative peptide ABC transporter permease protein	3373460..3374347		+	No	98	No	G	G	G	G	G	G	G	G	G	G	G	G	G	G	G	G	G	G	G	G	G	G	G	G	G	G	G	G	G	G	G	G	G
3401673	A->C	Yes	L	V	TTG	GTG	BP3189	1335	-	putative coenzyme A ligase	complement(3401224..3402558)		-	No	Tohama I	Yes	A	C	C	C	C	C	C	C	C	C	C	C	C	C	C	C	C	C	C	C	C	C	C	C	C	C	C	C	C	C	C	C	C
3402489	G->A	Yes	R	C	CGC	TGC	BP3189		-	putative coenzyme A ligase	complement(3401224..3402558)		-	No	15	No	G	G	G	G	G	G	G	G	A	G	G	G	G	G	G	G	G	G	G	G	G	G	G	G	G	G	G	G	G	G	G	G	G
3403673	G->A	Yes	Q	STOP	CAG	TAG	BP3191	1164	-	putative acyl-CoA dehyrdogenase	complement(3403221..3404384)		-	No	161	No	G	G	G	G	G	G	G	G	G	G	G	G	G	G	G	G	G	G	G	G	G	G	G	G	G	G	G	G	G	G	G	G	G
3404606	A->G	Yes	R	R	CGT	CGC	BP3192	1002	-	putative ABC transporter permease protein	complement(3404381..3405382)		-	Yes	Tohama I	Yes	A	G	G	G	G	G	G	G	G	G	G	G	G	G	G	G	G	G	G	G	G	G	G	G	G	G	G	G	G	G	G	G	G
3410596	C->G	Yes	P	R	CCC	CGC	BP3198	783	-	enoyl-CoA hydratase/isomerase family protein	3410019..3410801		+	No	Tohama I	Yes	C	G	G	G	G	G	G	G	G	G	G	G	G	G	G	G	G	G	G	G	G	G	G	G	G	G	G	G	G	G	G	G	G
3410776	G->T	Yes	R	L	CGC	CTC	BP3198		-	enoyl-CoA hydratase/isomerase family protein	3410019..3410801		+	No	101	No	G	G	G	G	G	G	G	G	G	G	G	G	G	G	G	G	G	G	G	G	G	G	G	G	G	G	G	G	G	G	G	G	G
3421372	G->A	Yes	SILLENT				BP3208	1262		conserved hypothetical protein (Pseudogene)				Yes	Tohama I	Yes	G	A	A	A	A	A	A	A	A	A	A	A	A	A	A	A	A	A	A	A	A	A	A	A	A	A	A	A	A	A	A	A	A
3423550	G->A	Yes	V	V	GTC	GTT	BP3211	464	dasF	ribonuclease HI	complement(3423301..3423768)		-	Yes	146	Yes	G	G	G	A	G	G	G	G	G	G	G	G	G	G	G	G	G	G	G	G	G	G	G	G	G	G	G	G	G	G	G	G	G
3427748	C->T	No|intergenic					BP3216P								Tohama I	Yes	C	T	T	T	T	T	T	T	T	T	T	T	T	T	T	T	T	T	T	T	T	T	T	T	T	T	T	T	T	T	T	T	T
3436869	A->G	Yes	G	G	GGT	GGC	BP3224	1056	-	putative cytochrome oxidase	complement(3435945..3437000)		-	Yes	Tohama I	Yes	A	G	G	G	G	G	G	G	G	G	G	G	G	G	G	G	G	G	G	G	G	G	G	G	G	G	G	G	G	G	G	G	G
3443629	T->C	No|intergenic					BP3231P		osmB						49	Yes	T	T	T	T	T	T	T	T	T	C	T	T	T	T	T	T	T	T	T	T	T	T	T	T	T	T	T	T	T	T	T	T	T
3462275	G->A	No|intergenic					INTERGENIC								Tohama I	Yes	G	A	A	A	N	A	A	A	A	A	A	A	A	N	A	A	A	N	A	N	N	N	A	A	A	A	A	A	N	N	N	A	A
3462277	A->G	No|intergenic					INTERGENIC								Tohama I	Yes	A	G	G	G	N	G	G	G	G	G	G	G	G	N	G	G	G	G	G	N	N	N	G	G	G	G	G	G	N	G	N	G	G
3462283	G->A	No|intergenic					INTERGENIC								Tohama I	Yes	G	A	A	A	N	A	A	A	A	A	A	A	A	A	A	A	A	A	A	N	N	A	A	A	A	A	A	A	A	A	N	A	A
3485861	C->A	Yes	A	E	GCG	GAG	BP3268	1290	-	putative membrane-bound transglycolase	3485197..3486486		+	No	33-104	No	C	C	C	C	C	C	C	C	C	C	C	C	C	C	C	C	C	C	C	C	C	C	C	C	C	C	C	C	C	C	C	C	C
3488746	G->C	Yes	G	R	GGC	CGC	BP3271	936	-	putative 2-hydroxyacid dehydrogenase	3488548..3489483		+	No	50-31	No	G	G	G	G	G	G	G	G	G	G	G	G	G	G	G	G	G	G	G	G	G	G	G	G	G	G	G	G	G	G	G	G	G
3489473	C->T	Yes	A	V	GCC	GTC	BP3271		-	putative 2-hydroxyacid dehydrogenase	3488548..3489483		+	No	136-138	No	C	T	T	C	C	C	C	C	C	C	C	C	C	C	C	C	C	C	C	C	C	C	C	C	C	C	C	C	C	C	C	C	C
3497812	A->G	No|intergenic					BP3279P								Tohama I	Yes	A	G	N	N	N	N	N	N	N	N	N	N	N	N	N	N	N	N	N	N	N	N	N	G	N	N	N	N	N	N	N	N	N
3497813	G->A	No|intergenic					BP3279P								Tohama I	Yes	G	A	A	N	N	N	N	N	N	N	N	N	N	N	N	N	N	A	N	N	N	N	N	A	N	N	N	N	N	N	N	N	N
3498486	C->T	No|intergenic					INTERGENIC								161-end	No	C	C	C	C	C	C	C	C	C	C	C	C	C	C	C	C	C	C	C	C	C	C	C	C	C	C	C	C	C	C	C	C	C
3549777	G->A	Yes	P	P	CCG	CCA	BP3329	2373	-	putative outer membrane (permeability) protein	3548641..3551013	Yes	+	Yes	Clade 7	No	G	G	G	G	G	G	G	G	G	G	G	G	G	G	G	G	G	G	G	G	G	G	G	G	G	G	G	G	G	G	G	A	A
3554017	G->A	Yes	R	R	CGC	CGT	BP3332	1146	garK	glycerate kinase	complement(3553423..3554568)		-	Yes	61	No	G	G	G	G	G	G	G	G	G	A	G	G	G	G	G	G	G	G	G	G	G	G	G	G	G	G	G	G	G	G	G	G	G
3576093	C->T	Yes	V	V	GTG	GTA	BP3358	813	-	hypothetical phage protein	complement(3575910..3576722)		-	Yes	146	No	C	C	C	T	C	C	C	C	C	C	C	C	C	C	C	C	C	C	C	C	C	C	C	C	C	C	C	C	C	C	C	C	C
3587622	A->G	Yes	I	I	ATT	ATC	BP3371	423	-	hypothetical protein	complement(3587496..3587918)		-	Yes	Tohama I	Yes	A	G	G	G	G	G	G	G	G	G	G	G	G	G	G	G	G	G	G	G	G	G	G	G	G	G	G	G	G	G	G	G	G
3590347	A->C	No|intergenic					BP378P								136-138	No	A	C	C	A	A	A	A	A	A	A	A	A	A	A	A	A	A	A	A	A	A	A	A	A	A	A	A	A	A	A	A	A	A
3590349	T->C	No|intergenic					BP378P								136-138	No	T	C	C	T	T	T	T	T	T	T	T	T	T	T	T	T	T	T	T	T	T	T	T	T	T	T	T	T	T	T	T	T	T
3591185	T->C	Yes					BP3379	995		hypothetical protein					145-end	Yes	T	T	T	T	C	C	C	C	C	C	C	C	C	C	C	C	C	C	C	C	C	C	C	C	C	C	C	C	C	C	C	C	C
3593487	T->C	Yes	Q	R	CAG	CGG	BP3382	1056	-	hypothetical protein	complement(3592730..3593785)		-	No	101-143	No	T	T	T	T	T	T	T	T	T	T	T	T	T	T	T	T	T	T	T	T	T	T	T	T	T	T	T	T	T	T	T	T	T
3596789	T->G	Yes	N	H	AAT	CAT	BP3385	450	-	Conserved hypothetical protein	complement(3596499..3596948)		-	No	136-138	Yes	T	G	G	T	T	T	T	T	T	T	T	T	T	T	T	T	T	T	T	T	T	T	T	T	T	T	T	T	T	T	T	T	T
3596916	A->G	Yes	F	F	TTT	TTC	BP3385		-	Conserved hypothetical protein	complement(3596499..3596948)		-	Yes	Tohama I	Yes	A	G	G	G	G	G	G	G	G	G	G	G	G	G	G	G	G	G	G	G	G	G	G	G	G	G	G	G	G	G	G	G	G
3597154	G->A	No|intergenic					INTERGENIC								39	No	G	G	G	G	G	G	G	G	G	G	G	G	G	G	G	G	G	G	G	G	G	G	G	G	G	G	G	G	G	G	G	G	G
3598606	C->T	No|intergenic					BP3386P								Tohama I	Yes	C	T	T	N	N	N	N	N	N	N	N	N	N	N	N	N	N	N	N	N	N	N	N	N	N	T	N	N	N	N	N	N	N
3599787	C->T	Yes	T	I	ACA	ATA	BP3389	321	-	Conserved hypothetical protein	3599519..3599839		+	No	82	No	C	C	C	C	C	C	C	C	C	C	C	C	C	C	C	C	C	C	C	C	C	C	C	C	C	C	C	C	C	C	C	T	C
3602441	G->T	No|intergenic					BP3392P								Tohama I	Yes	G	T	N	N	N	N	T	N	N	N	N	N	N	T	N	N	T	N	N	N	N	N	N	N	N	T	N	N	N	T	N	N	N
3602442	T->C	No|intergenic					BP3392P								Tohama I	Yes	T	C	C	N	N	N	C	N	N	N	N	N	N	C	N	N	C	N	N	N	N	N	N	N	N	C	N	N	N	C	N	C	N
3613994	G->A	Yes	A	V	GCC	GTC	BP3405	1095	ompQ	outer membrane porin protein OmpQ	complement(3612925..3614019)	Yes	-	No	155-164	No	G	G	G	G	G	G	G	G	G	G	G	G	G	G	G	G	G	G	G	G	G	G	G	A	A	A	G	G	G	G	G	G	G
3619407	T->C	No|intergenic					BP3410P / BP3411P								Tohama I	Yes	T	C	C	C	C	C	C	C	C	C	C	C	C	C	C	C	C	C	C	C	C	C	C	C	C	C	C	C	C	C	C	C	C
3622629	A->G	No|intergenic					BP3414								33-104	No	A	A	A	A	A	A	A	A	A	A	A	A	A	A	A	A	A	A	A	A	A	A	A	A	A	A	A	A	A	A	A	A	A
3645025	T->C	No|intergenic					BP3437P								Tohama I	Yes	T	C	C	C	C	C	C	C	C	C	C	C	C	C	C	C	C	C	C	C	C	C	C	C	C	C	C	C	C	C	C	C	C
3646971	G->A	No|intergenic					BP3439P		dntP	dermonecrotic toxin					clade 5	Yes	G	G	G	G	G	G	G	G	G	G	G	G	G	G	G	G	G	G	A	A	A	A	A	A	A	A	G	G	G	G	G	G	G
3663983	A->G	Yes	V	A	GTC	GCC	BP3454	966	-	putative lipoprotein	complement(3663664..3664629)		-	No	90	No	A	A	A	A	A	A	A	A	A	A	A	A	A	A	G	A	A	A	A	A	A	A	A	A	A	A	A	A	A	A	A	A	A
3670866	G->A	Yes	A	A	GCG	GCA	BP3459	834	-	binding-protein-dependent transport systems inner membrane component	3670492..3671325		+	Yes	Clade 4	No	G	G	G	G	G	G	G	G	G	G	G	G	G	G	G	G	A	A	G	G	G	G	G	G	G	G	G	G	G	G	G	G	G
3671042	G->A	Yes	R	Q	CGG	CAG	BP3459		-	binding-protein-dependent transport systems inner membrane component	3670492..3671325		+	No	53	No	G	G	G	G	G	G	G	G	G	G	G	G	G	G	G	G	G	G	G	G	G	G	G	G	G	G	G	G	G	G	G	G	G
3674861	G->A	Yes	M	I	ATG	ATA	BP3462	1536	-	Conserved hypothetical protein	3674859..3676394		+	No	Clade 4	No	G	G	G	G	G	G	G	G	G	G	G	G	G	G	G	G	A	A	G	G	G	G	G	G	G	G	G	G	G	G	G	G	G
3685142	G->A	Yes	R	C	CGC	TGC	BP3472	621	-	Conserved hypothetical protein	complement(3684615..3685235)		-	No	88-143	No	G	G	G	G	G	G	G	G	G	G	G	G	G	G	G	G	G	G	G	G	G	G	G	G	G	G	G	G	G	G	G	G	G
3686708	G->A	Yes	S	L			BP3474	1599		conserved hypothetical protein (pseudogene)				No	146	Yes	G	G	G	A	G	G	G	G	G	G	G	G	G	G	G	G	G	G	G	G	G	G	G	G	G	G	G	G	G	G	G	G	G
3687356	G->A	Yes					BP3474			conserved hypothetical protein (pseudogene)					Clade 2	No	G	G	G	G	G	G	G	G	G	G	G	A	A	G	G	G	G	G	G	G	G	G	G	G	G	G	G	G	G	G	G	G	G
3690455	C->T	Yes	E	K	GAA	AAA	BP3479	951	-	putative transport system ATP-binding protein (pseudogene)	complement(3690426..3691376)		-	No	61	No	C	C	C	C	C	C	C	C	C	T	C	C	C	C	C	C	C	C	C	C	C	C	C	C	C	C	C	C	C	C	C	C	C
3695886	A->G	Yes					BP3484	1176	ribB	putative 3,4-dihydroxy-2-butanone 4-phosphate synthase					Clade 4	No	A	A	A	A	A	A	A	A	A	A	A	A	A	A	A	A	G	G	A	A	A	A	A	A	A	A	A	A	A	A	A	A	A
3706026	C->T	Yes	Y	Y	TAC	TAT	BP3494	3033	brkA	serum resistance protein	3703057..3706089	Yes	+	Yes	88-42	No	C	C	C	C	C	C	C	C	C	C	C	C	C	C	C	C	C	C	C	C	C	C	C	C	C	C	C	C	C	C	C	C	C
3713145	A->G	Yes	V	A	GTC	GCC	BP3501	951	-	putative exported protein	complement(3712316..3713266)		-	No	61	No	A	A	A	A	A	A	A	A	A	G	A	A	A	A	A	A	A	A	A	A	A	A	A	A	A	A	A	A	A	A	A	A	A
3716818	G->C	No|intergenic					BP3505P								49	No	G	G	G	G	G	G	G	G	G	G	C	G	G	G	G	G	G	G	G	G	G	G	G	G	G	G	G	G	G	G	G	G	G
3716819	A->T	No|intergenic					BP3505P								49	No	A	A	A	A	A	A	A	A	A	A	T	A	A	A	A	A	A	A	A	A	A	A	A	A	A	A	A	A	A	A	A	A	A
3716820	T->G	No|intergenic					BP3505P								49	No	T	T	T	T	T	T	T	T	T	T	G	T	T	T	T	T	T	T	T	T	T	T	T	T	T	T	T	T	T	T	T	T	T
3720998	G->C	Yes					BP3508	606		hypothetical protein					98-130	No	G	G	G	G	G	G	G	G	G	G	G	N	G	G	G	G	G	G	G	G	G	G	G	G	G	G	G	G	G	G	G	G	G
3720999	A->T	No|intergenic					BP3510P								98-130	No	A	A	A	A	A	A	A	A	A	A	A	N	A	A	A	A	A	A	A	A	A	A	A	A	A	A	A	A	A	A	A	A	A
3721000	T->G	No|intergenic					BP3510P								98-130	No	T	T	T	T	T	T	T	T	T	T	T	N	T	T	T	T	T	T	T	T	T	T	T	T	T	T	T	T	T	T	T	T	T
3727430	G->A	Yes	R	H	CGC	CAC	BP3518	1431	-	putative phospholipase D family protein	3726844..3728274		+	No	Clade 4	No	G	G	G	G	G	G	G	G	G	G	G	G	G	G	G	G	A	A	G	G	G	G	G	G	G	G	G	G	G	G	G	G	G
3753208	C->T	Yes	H	Y	CAC	TAC	BP3540	291	-	Conserved hypothetical protein	3752947..3753237		+	No	43	No	C	C	C	C	C	C	C	C	C	C	C	C	C	C	C	C	C	C	C	C	C	C	C	C	C	C	C	C	C	C	C	C	T
3753863	T->G	Yes	I	I	ATA	ATC	BP3541	909	-	LysR family regulatory protein	complement(3753242..3754150)		-	Yes	Tohama I	Yes	T	G	G	G	G	G	G	G	G	G	G	G	G	G	G	G	G	G	G	G	G	G	G	G	G	G	G	G	G	G	G	G	G
3757929	A->G	Yes	T	A	ACT	GCT	BP3546	918	-	Conserved hypothetical protein	3757641..3758558		+	No	Tohama I	Yes	A	G	G	G	G	G	G	G	G	G	G	G	G	G	G	G	G	G	G	G	G	G	G	G	G	G	G	G	G	G	G	G	G
3760548	G->T	Yes					BP3549	1219		putative transport protein (pseudogene)					130	No	G	G	G	G	G	G	G	G	G	G	G	G	G	G	G	G	G	G	G	G	G	G	G	G	G	G	G	G	G	G	G	G	G
3779960	C->T	Yes	A	V	GCC	GTC	BP3566	600	-	putative cobalt transport protein	3779449..3780048		+	No	145	No	C	C	C	C	T	C	C	C	C	C	C	C	C	C	C	C	C	C	C	C	C	C	C	C	C	C	C	C	C	C	C	C	C
3783560	A->C	Yes	Y	S	TAT	TCT	BP3570	1797	-	putative branched-chain amino acid transport system protein	3783238..3785034		+	No	145	Yes	A	A	A	A	C	A	A	A	A	A	A	A	A	A	A	A	A	A	A	A	A	A	A	A	A	A	A	A	A	A	A	A	A
3785151	C->G	Yes	S	T	AGC	ACC	BP3571	840	-	putative aminotransferase	complement(3785081..3785920)		-	No	147	No	C	C	C	C	C	C	C	C	C	C	C	C	G	C	C	C	C	C	C	C	C	C	C	C	C	C	C	C	C	C	C	C	C
3789720	T->C	Yes	D	G	GAC	GGC	BP3575	1215	-	putative exported protein	complement(3788999..3790213)	Yes	-	No	85	No	T	T	T	T	T	T	T	T	T	T	T	T	T	T	T	T	T	T	T	T	T	T	T	T	T	T	T	T	T	T	T	T	T
3806689	G->A	No|intergenic					BP3593P								Tohama I	Yes	G	A	N	N	N	N	A	N	A	A	N	A	A	A	A	N	N	N	N	N	N	N	N	A	N	A	N	A	N	N	N	N	A
3806693	C->T	Yes								trasposase					multiple	Yes	C	N	N	N	N	N	N	N	N	N	N	T	N	N	N	N	N	N	C	C	C	C	C	C	C	C	N	N	N	N	N	N	T
3824628	G->A	No|intergenic					BP3607P								90-end	Yes	G	G	G	G	N	N	N	N	N	N	N	N	N	A	A	N	N	N	N	N	N	N	N	N	A	A	N	N	N	N	N	N	N
3837781	T->C	Yes	E	E	GAA	GAG	BP3624	1428	-	putative aldehyde dehydrogenase	complement(3836362..3837789)	Yes	-	Yes	61	No	T	T	T	T	T	T	T	T	T	C	T	T	T	T	T	T	T	T	T	T	T	T	T	T	T	T	T	T	T	T	T	T	T
3837992	G->T	No|intergenic					INTERGENIC								clade 5	Yes	G	G	G	G	G	G	G	G	G	G	G	G	G	G	G	G	G	G	T	T	T	T	T	T	T	T	G	G	G	G	G	G	G
3840411	G->A	Yes	S	S	TCG	TCA	BP3630	396	rpsH	30S ribosomal protein S8	3840262..3840657		+	Yes	145-end	Yes	G	G	G	G	A	A	A	A	A	A	A	A	A	A	A	A	A	A	A	A	A	A	A	A	A	A	A	A	A	A	A	A	A
3843034	A->G	Yes	T	A	ACA	GCA	BP3636	1326	prlA	preprotein translocase SecY subunit	3842779..3844104		+	No	Tohama I	Yes	A	G	G	G	G	G	G	G	G	G	G	G	G	G	G	G	G	G	G	G	G	G	G	G	G	G	G	G	G	G	G	G	G
3843423	G->A	Yes	A	A	GCG	GCA	BP3636		prlA	preprotein translocase SecY subunit	3842779..3844104		+	Yes	145	No	G	G	G	G	A	G	G	G	G	G	G	G	G	G	G	G	G	G	G	G	G	G	G	G	G	G	G	G	G	G	G	G	G
3846833	G->A	Yes	V	V	GTG	GTA	BP3642	987	rpoA	DNA-directed RNA polymerase alpha chain	3846153..3847139	Yes	+	Yes	146-end	Yes	G	G	G	A	A	A	A	A	A	A	A	A	A	A	A	A	A	A	A	A	A	A	A	A	A	A	A	A	A	A	A	A	A
3848201	C->T	No|intergenic					BP3644/BP3645P								49	No	C	C	C	C	C	C	C	C	C	C	T	C	C	C	C	C	C	C	C	C	C	C	C	C	C	C	C	C	C	C	C	C	C
3852058	G->A	Yes	A	V	GCC	GTC	BP3648	1017	hemB	putative delta-aminolevulinic acid dehydratase	complement(3851643..3852659)		-	No	146	Yes	G	G	G	A	G	G	G	G	G	G	G	G	G	G	G	G	G	G	G	G	G	G	G	G	G	G	G	G	G	G	G	G	G
3857795	G->A	No|intergenic					INTERGENIC								43	No	G	G	G	G	G	G	G	G	G	G	G	G	G	G	G	G	G	G	G	G	G	G	G	G	G	G	G	G	G	G	G	G	A
3881298	G->A	Yes	A	T	GCG	ACG	BP3671	1146	-	putative glycosyl transferases	3880344..3881489		+	No	Clade 4	No	G	G	G	G	G	G	G	G	G	G	G	G	G	G	G	G	A	A	G	G	G	G	G	G	G	G	G	G	G	G	G	G	G
3888609	C->T	Yes	V	I	GTC	ATC	BP3680	2178	glc	malate synthase G	complement(3888430..3890607)	Yes	-	No	Clade 4	No	C	C	C	C	C	C	C	C	C	C	C	C	C	C	C	C	T	T	C	C	C	C	C	C	C	C	C	C	C	C	C	C	C
3890915	A->G	Yes	Q	R			BP3681	766	glcC	GntR-family transcriptional regulator (pseudogene)				No	Tohama I	Yes	A	G	G	G	G	G	G	G	G	G	G	G	G	G	G	G	G	G	G	G	G	G	G	G	G	G	G	G	G	G	G	G	G
3896214	C->T	Yes	C	C	TGC	TGT	BP3686	495	-	Conserved hypothetical protein	3895756..3896250		+	Yes	49	No	C	C	C	C	C	C	C	C	C	C	T	C	C	C	C	C	C	C	C	C	C	C	C	C	C	C	C	C	C	C	C	C	C
3903144	C->T	Yes					BP3694	1262		conserved hypothetical protein (pseudogene)					80-154	No	C	C	C	C	C	T	T	T	C	C	C	C	C	C	C	C	C	C	C	C	C	C	C	C	C	C	C	C	C	C	C	C	C
3903493	C->A	yes					BP3694			conserved protein			+		clade 5	No	C	C	C	C	C	C	C	C	C	C	C	C	C	C	C	C	C	C	A	A	A	A	A	A	A	A	C	C	C	C	C	C	C
3907162	A->G	No|intergenic					BP3698P								136-138	Yes	A	G	G	A	A	A	A	A	A	A	A	A	A	A	A	A	N	N	A	A	A	A	A	A	A	A	A	A	A	A	A	A	A
3907164	T->G	No|intergenic					BP3698P								136-138	Yes	T	G	G	T	T	T	T	T	T	T	T	T	T	T	T	T	T	T	T	T	T	T	T	T	T	T	T	T	T	T	T	T	T
3922563	G->A	Yes	A	A	GCC	GCT	BP3713	1305	-	putative amidase	complement(3921312..3922616)		-	Yes	154	No	G	G	G	G	G	G	G	A	G	G	G	G	G	G	G	G	G	G	G	G	G	G	G	G	G	G	G	G	G	G	G	G	G
3923968	G->A	Yes	A	T	GCG	ACG	BP3715	915	-	LysR family regulatory protein	3923527..3924441		+	No	145	No	G	G	G	G	A	G	G	G	G	G	G	G	G	G	G	G	G	G	G	G	G	G	G	G	G	G	G	G	G	G	G	G	G
3938341	C->T	Yes	A	T	GCG	ACG	BP3728	1323	rkpK	putative UDP-glucose 6-dehydrogenase	complement(3937196..3938518)		-	No	146-end	Yes	C	C	C	T	T	T	T	T	T	T	T	T	T	T	T	T	T	T	T	T	T	T	T	T	T	T	T	T	T	T	T	T	T
3942252	G->A	No|intergenic					BP3731P								154	No	G	G	G	G	G	G	G	A	G	G	G	G	G	G	G	G	G	G	G	G	G	G	G	G	G	G	G	G	G	G	G	G	G
3950021	A->G	Yes	F	F	TTT	TTC	BP3743	1608	coxA	cytochrome c oxidase polypeptide I	complement(3949184..3950791)		-	Yes	Tohama I	Yes	A	G	G	G	G	G	G	G	G	G	G	G	G	G	G	G	G	G	G	G	G	G	G	G	G	G	G	G	G	G	G	G	G
3957159	C->T	No|intergenic					INTERGENIC								Tohama I	Yes	C	T	T	T	T	T	T	T	T	T	T	T	T	T	T	T	T	T	T	T	T	T	T	T	T	T	T	T	T	T	T	T	T
3957576	G->A	Yes	H	H	CAC	CAT	BP3748	924	fam	RNA polymerase sigma-32 factor	complement(3957192..3958115)		-	Yes	61	No	G	G	G	G	G	G	G	G	G	A	G	G	G	G	G	G	G	G	G	G	G	G	G	G	G	G	G	G	G	G	G	G	G
3959772	G->A	Yes	Q	STOP	CAA	TAA	BP3750	849	-	putative esterase	complement(3958972..3959820)		-	No	Clade 3	Yes	G	G	G	G	G	G	G	G	G	G	G	G	G	G	A	A	G	G	G	G	G	G	G	G	G	G	G	G	G	G	G	G	G
3971354	C->T	Yes	A	V	GCG	GTG	BP3757	837	-	putative ABC transporter, ATP-binding protein	3970585..3971421	Yes	+	No	141-127	No	C	C	C	C	C	C	C	C	C	C	C	C	C	C	C	C	C	C	C	C	C	C	C	C	C	C	T	T	C	C	C	C	C
3988168	G->A	No|intergenic					BP3783P		ptxP						145-end	Yes	G	G	G	G	A	A	A	A	A	A	A	A	A	A	A	A	A	A	A	A	A	A	A	A	A	A	A	A	A	A	A	A	A
3988941	G->A	Yes	M	I	ATG	ATA	BP3783	810	ptxA	pertussis toxin subunit 1 precursor	3988258..3989067	Yes	+	No	146-end	Yes	G	G	G	A	A	A	A	A	A	A	A	A	A	A	A	A	A	A	A	A	A	A	A	A	A	A	A	A	A	A	A	A	A
3989239	G->A	Yes	G	S	GGC	AGC	BP3784	681	ptxB	pertussis toxin subunit 2 precursor	3989107..3989787		+	No	Tohama I	Yes	G	A	A	A	A	A	A	A	A	A	A	A	A	A	A	A	A	A	A	A	A	A	A	A	A	A	A	A	A	A	A	A	A
3989577	C->T	Yes	V	V	GTC	GTT	BP3784		ptxB	pertussis toxin subunit 2 precursor	3989107..3989787		+	Yes	Clade 4	No	C	C	C	C	C	C	C	C	C	C	C	C	C	C	C	C	T	T	C	C	C	C	C	C	C	C	C	C	C	C	C	C	C
3991376	C->T	Yes	C	C	TGC	TGT	BP3787	684	ptxC	pertussis toxin subunit 3 precursor	3990696..3991379		+	Yes	145-end	Yes	C	C	C	C	T	T	T	T	T	T	T	T	T	T	T	T	T	T	T	T	T	T	T	T	T	T	T	T	T	T	T	T	T
4007734	T->C	Yes	R	R	CGT	CGC	BP3803	972	-	putative transport system permease protein	4007111..4008082		+	Yes	Tohama I	Yes	T	C	C	C	C	C	C	C	C	C	C	C	C	C	C	C	C	C	C	C	C	C	C	C	C	C	C	C	C	C	C	C	C
4010389	G->A	No|intergenic					BP3806/BP3807P								fim3-2	Yes	G	G	G	G	N	A	A	N	N	A	N	N	A	A	N	N	N	A	N	N	N	A	N	A	N	A	N	N	N	N	N	N	N
4010774	G->C	Yes	G	A	GGC	GCC	BP3807	1227	argJ	arginine biosynthesis bifunctional protein	4010530..4011756		+	No	33-104	No	G	G	G	G	G	G	G	G	G	G	G	G	G	G	G	G	G	G	G	G	G	G	G	G	G	G	G	G	G	G	G	G	G
4015848	G->A	Yes	E	K	GAA	AAA	BP3811	951	-	transposase	4014927..4015877		+	No	Tohama I	Yes	G	A	A	A	N	A	A	A	A	A	A	A	A	A	A	N	A	A	A	A	A	A	A	A	A	A	N	A	N	A	A	A	N
4015977	C->T	Yes	R	Q	CGG	CAG	BP3812	1481	-	putative outer membrane efflux protein	complement(4015874..4017358)		-	No	146	Yes	C	C	C	T	C	C	C	C	C	C	C	C	C	C	C	C	C	C	C	C	C	C	C	C	C	C	C	C	C	C	C	C	C
4033170	G->A	Yes	S	N	AGC	AAC	BP3825	1527	glpK	glycerol kinase	4032293..4033819		+	No	Clade8	Yes	G	G	G	G	G	G	G	G	G	G	G	G	G	G	G	G	G	G	G	G	G	G	G	G	G	G	G	G	G	G	G	G	G
4034094	G->A	Yes	P	L	CCC	CTC	BP3826	468	-	putative membrane protein	complement(4033838..4034305)		-	No	87	No	G	G	G	G	G	G	G	G	G	G	G	G	G	A	G	G	G	G	G	G	G	G	G	G	G	G	G	G	G	G	G	G	G
4042763	G->A	No|intergenic					BP3835	3613							152	No	G	G	G	G	G	G	G	G	G	G	G	G	G	G	G	G	G	G	G	G	G	G	G	G	G	G	G	G	G	G	G	G	G
4044275	T->C	Yes	SILLENT				BP3835	3613		putative pyruvate ferredoxin/flavodoxin oxidoreductase (pseudogene)				Yes	Tohama I	Yes	T	C	C	C	C	C	C	C	C	C	C	C	C	C	C	C	C	C	C	C	C	C	C	C	C	C	C	C	C	C	C	C	C
4054308	T->C	Yes	C	R	TGT	CGT	BP3843	969	-	putative lipoprotein	4053699..4054667		+	No	Clade 6	Yes	T	T	T	T	T	T	T	T	T	T	T	T	T	T	T	T	T	T	T	T	T	T	T	T	T	T	C	C	C	C	C	T	T
4056576	C->A	Yes	R	L	CGC	CTC	BP3846	687	-	TetR family transcriptional regulator	complement(4056332..4057018)		-	No	101	No	C	C	C	C	C	C	C	C	C	C	C	C	C	C	C	C	C	C	C	C	C	C	C	C	C	C	C	C	C	C	C	C	C
4059533	G->A	Yes	Q	Q	CAG	CAA	BP3849	1263	-	Conserved hypothetical protein	4059033..4060295		+	Yes	82	No	G	G	G	G	G	G	G	G	G	G	G	G	G	G	G	G	G	G	G	G	G	G	G	G	G	G	G	G	G	G	G	A	G
4066807	A->G	Yes	V	A	GTG	GCG	BP3856	924	-	putative taurine catabolism dioxygenase	complement(4066206..4067129)		-	No	Clade 6	No	A	A	A	A	A	A	A	A	A	A	A	A	A	A	A	A	A	A	A	A	A	A	A	A	A	A	G	G	G	G	G	A	A
4068047	C->T	Yes	G	S	GGC	AGC	BP3857	1200	-	putative hydrolase	complement(4067259..4068458)		-	No	145-end	Yes	C	C	C	C	T	T	T	T	T	T	T	T	T	T	T	T	T	T	T	T	T	T	T	T	T	T	T	T	T	T	T	T	T
4068650	C->T	Yes	G	S	GGC	AGC	BP3858	1017	-	putative transport ATP-binding protein	complement(4068516..4069532)		-	No	145-end	Yes	C	C	C	C	T	T	T	T	T	T	T	T	T	T	T	T	T	T	T	T	T	T	T	T	T	T	T	T	T	T	T	T	T
4071996	G->A	Yes	I	I	ATC	ATT	BP3861	975	-	putative transport system permease protein	complement(4071474..4072448)		-	Yes	145-end	Yes	G	G	G	G	A	A	A	A	A	A	A	A	A	A	A	A	A	A	A	A	A	A	A	A	A	A	A	A	A	A	A	A	A
[truncated: 25 more columns]

## Sheet: ptxP3 common SNPs
Site	R_base	Final_Nucleotide	isAACalculated	AA_original	AA_SNP	codon_orig	codon_snp	locus_tag	gene_name	function	location	CDS_start_loc	strand	isAAsame		Tohama I	IR136	IR138	IR146	IR145	IR81	IR80	IR154	IR15	IR61	IR49	IR82	IR43	IR53	IR17	IR87	IR90	IR62	IR121	IR122	IR70	IR91	IR123	IR149	IR128	IR164	IR155	IR129	IR112	IR147	IR141	IR127	IR131	IR89
36857	A	G	No|intergenic					BP0032P / BP0033P	- / glyQP						ptxP3	A	A	A	A	G	G	G	G	G	G	G	G	G	G	G	G	G	G	G	G	G	G	G	G	G	G	G	G	G	G	G	G	G	G
50044	C	G	No|intergenic					BP0049P							ptxP3	C	C	C	C	G	G	G	G	G	G	G	G	G	G	G	G	G	G	G	G	G	G	G	G	G	G	G	G	G	G	G	G	G	G
185405	G	A	Yes	Q	Q	CAG	CAA	BP0184	-	putative exported protein	184326..188024	1	+	Yes	ptxP3	G	G	G	G	A	A	A	A	A	A	A	A	A	A	A	A	A	A	A	A	A	A	A	A	A	A	A	A	A	A	A	A	A	A
196307	T	C	Yes	V	A	GTG	GCG	BP0194	-	probable metal transporter	196114..197007	1	+	No	ptxP3	T	T	T	T	C	C	C	C	C	C	C	C	C	C	C	C	C	C	C	C	C	C	C	C	C	C	C	C	C	C	C	C	C	C
220937	G	A	Yes	L	L	CTG	CTA	BP0215	ppc	phosphoenolpyruvate carboxylase	220068..223010	1	+	Yes	ptxP3	G	G	G	G	A	A	A	A	A	A	A	A	A	A	A	A	A	A	A	A	A	A	A	A	A	A	A	A	A	A	A	A	A	A
299559	C	T	Yes	A	T			BP0292		conserved hypothetical protein (Pseudogene)				No	ptxP3	C	C	C	C	T	T	T	T	T	T	T	T	T	T	T	T	T	T	T	T	T	T	T	T	T	T	T	T	T	T	T	T	T	T
511992	A	G	No|intergenic					BP0499P/BP0500P	btcAP / bteAP						ptxP3	A	A	A	A	G	G	G	G	G	G	G	G	G	G	G	G	G	G	G	G	G	G	G	G	G	G	G	G	G	G	G	G	G	G
514171	G	A	No|intergenic					INTERGENIC							ptxP3	G	G	G	G	A	A	A	A	A	A	A	A	A	A	A	A	A	A	A	A	A	A	A	A	A	A	A	A	A	A	A	A	A	A
517207	G	T	Yes	A	A	GCC	GCA	BP0505	-	phage-related protein	complement(516955..517296)	1	-	Yes	ptxP3	G	G	G	G	T	T	T	T	T	T	T	T	T	T	T	T	T	T	T	T	T	T	T	T	T	T	T	T	T	T	T	T	T	T
518837	T	C	Yes	E	E	GAA	GAG	BP0507	-	hypothetical protein	complement(518528..519055)	1	-	Yes	ptxP3	T	T	T	T	C	C	C	C	C	C	C	C	C	C	C	C	C	C	C	C	C	C	C	C	C	C	C	C	C	C	C	C	C	C
525420	G	C	Yes	D	E	GAC	GAG	BP0518	-	Conserved hypothetical protein	complement(525210..525605)	1	-	No	ptxP3	G	G	G	G	C	C	C	C	C	C	C	C	C	C	C	C	C	C	C	C	C	C	C	C	C	C	C	C	C	C	C	C	C	C
694521	A	G	Yes	K	K	AAA	AAG	BP0678	prfA	peptide chain release factor 1	694516..695598	1	+	Yes	ptxP3	A	A	A	A	G	G	G	G	G	G	G	G	G	G	G	G	G	G	G	G	G	G	G	G	G	G	G	G	G	G	G	G	G	G
883816	C	T	Yes	L	F	CTC	TTC	BP0854	nuoN	NADH-ubiquinone oxidoreductase, chain N	883741..885225	1	+	No	ptxP3	C	C	C	C	T	T	T	T	T	T	T	T	T	T	T	T	T	T	T	T	T	T	T	T	T	T	T	T	T	T	T	T	T	T
929666	G	A	Yes	R	H	CGC	CAC	BP0891	-	transposase	928954..929904	1	+	No	ptxP3	G	N	G	G	A	N	N	A	N	A	A	A	A	N	A	N	N	A	A	A	N	N	N	N	A	A	N	N	N	A	A	A	N	N
1077844	C	T	No|intergenic					BP1035P							ptxP3	C	C	C	C	T	N	T	N	T	N	T	T	N	T	T	T	T	T	T	N	T	T	T	T	T	N	T	T	T	T	T	T	N	N
1098918	T	C	Yes	G	G	GGT	GGC	BP1054	prn	pertactin precursor	1098091..1100823	1	+	Yes	ptxP3	T	T	T	T	C	C	C	C	C	C	C	C	C	C	C	C	C	C	C	C	C	C	C	C	C	C	C	C	C	C	C	C	C	C
1137841	C	A	Yes	T	K	ACG	AAG	BP1090	-	Conserved hypothetical protein	1137411..1138874	1	+	No	ptxP3	C	C	C	C	A	A	A	A	A	A	A	A	A	A	A	A	A	A	A	A	A	A	A	A	A	A	A	A	A	A	A	A	A	A
1290405	G	A	Yes	G	G	GGG	GGA	BP1227	radA	DNA repair protein	1290181..1291542	1	+	Yes	ptxP3	G	G	G	G	A	A	A	A	A	A	A	A	A	A	A	A	A	A	A	A	A	A	A	A	A	A	A	A	A	A	A	A	A	A
1331840	G	A	Yes	A	T			BP1261		conserved hypothetical protein (Pseudogene)				No	ptxP3	G	G	G	G	A	A	A	A	A	A	A	A	A	A	A	A	A	A	A	A	A	A	A	A	A	A	A	A	A	A	A	A	A	A
1547488	A	G	Yes	N	S	AAC	AGC	BP1471	-	Conserved hypothetical protein	1547484..1548113	1	+	No	ptxP3	A	A	A	A	G	G	G	G	G	G	G	G	G	G	G	G	G	G	G	G	G	G	G	G	G	G	G	G	G	G	G	G	G	G
1827556	G	A	Yes	SILENT				BP1741		putative ABC transporter (Pseudogene)				Yes	ptxP3	G	G	G	G	A	A	A	A	A	A	A	A	A	A	A	A	A	A	A	A	A	A	A	A	A	A	A	A	A	A	A	A	A	A
2374322	T	C	Yes	Y	C	TAC	TGC	BP2249	bscI	putative type III secretion protein	complement(2374255..2374662)	1	-	No	ptxP3	T	T	T	T	C	C	C	C	C	C	C	C	C	C	C	C	C	C	C	C	C	C	C	C	C	C	C	C	C	C	C	C	C	C
2632911	C	A	Yes	Q	H	CAG	CAT	BP2485	-	transposase	complement(2632827..2633777)	1	-	No	ptxP3	C	N	N	C	A	N	N	N	N	N	A	N	N	N	N	A	A	A	N	N	A	N	A	A	A	N	N	A	N	A	N	A	N	N
2651008	G	A	Yes	T	I	ACC	ATC	BP2502	-	hypothetical protein	complement(2650959..2651201)	1	-	No	ptxP3	G	G	G	G	A	A	A	A	A	A	A	A	A	A	A	A	A	A	A	A	A	A	A	A	A	A	A	A	A	A	A	A	A	A
3263622	A	C	No|intergenic					BP3062P							ptxP3	A	A	A	A	C	C	C	C	C	C	C	C	C	C	C	C	C	C	C	C	C	C	C	C	C	C	C	C	C	C	C	C	C	C
3591185	T	C	Yes					BP3379							ptxP3	T	T	T	T	C	C	C	C	C	C	C	C	C	C	C	C	C	C	C	C	C	C	C	C	C	C	C	C	C	C	C	C	C	C
3840411	G	A	Yes	S	S	TCG	TCA	BP3630	rpsH	30S ribosomal protein S8	3840262..3840657	1	+	Yes	ptxP3	G	G	G	G	A	A	A	A	A	A	A	A	A	A	A	A	A	A	A	A	A	A	A	A	A	A	A	A	A	A	A	A	A	A
3988168	G	A	No|intergenic					BP3783P	ptxP						ptxP3	G	G	G	G	A	A	A	A	A	A	A	A	A	A	A	A	A	A	A	A	A	A	A	A	A	A	A	A	A	A	A	A	A	A
3991376	C	T	Yes	C	C	TGC	TGT	BP3787	ptxC	pertussis toxin subunit 3 precursor	3990696..3991379	1	+	Yes	ptxP3	C	C	C	C	T	T	T	T	T	T	T	T	T	T	T	T	T	T	T	T	T	T	T	T	T	T	T	T	T	T	T	T	T	T
4068047	C	T	Yes	G	S	GGC	AGC	BP3857	-	putative hydrolase	complement(4067259..4068458)	1	-	No	ptxP3	C	C	C	C	T	T	T	T	T	T	T	T	T	T	T	T	T	T	T	T	T	T	T	T	T	T	T	T	T	T	T	T	T	T
4068650	C	T	Yes	G	S	GGC	AGC	BP3858	-	putative transport ATP-binding protein	complement(4068516..4069532)	1	-	No	ptxP3	C	C	C	C	T	T	T	T	T	T	T	T	T	T	T	T	T	T	T	T	T	T	T	T	T	T	T	T	T	T	T	T	T	T
4071996	G	A	Yes	I	I	ATC	ATT	BP3861	-	putative transport system permease protein	complement(4071474..4072448)	1	-	Yes	ptxP3	G	G	G	G	A	A	A	A	A	A	A	A	A	A	A	A	A	A	A	A	A	A	A	A	A	A	A	A	A	A	A	A	A	A
[truncated: 22 more columns]

## Sheet: Prn 9 common SNPs
Site	R_base	Final_Nucleotide	isAACalculated	AA_original	AA_SNP	codon_orig	codon_snp	locus_tag	gene_name	function	location	CDS_start_loc	strand	isAAsame		Tohama I	IR136	IR138	IR146	IR145	IR81	IR80	IR154	IR15	IR61	IR49	IR82	IR43	IR53	IR17	IR87	IR90	IR62	IR121	IR122	IR70	IR91	IR123	IR149	IR128	IR164	IR155	IR129	IR112	IR147	IR141	IR127	IR131	IR89
69055	C	A	No|intergenic					BP0070P							prn9	C	C	C	N	C	C	C	C	C	C	C	C	C	C	C	C	C	C	C	C	A	N	N	N	N	N	A	A	C	C	C	C	C	C
170017	G	A	Yes	L	L	CTG	CTA	BP0170	rhlE	putative ATP-dependent RNA helicase	169079..170509	1	+	Yes	prn9	G	G	G	G	G	G	G	G	G	G	G	G	G	G	G	G	G	G	G	G	A	A	A	A	A	A	A	A	G	G	G	G	G	G
359529	C	T	No|intergenic					BP0359p		hypothetical protein					prn9	C	C	C	C	C	C	C	C	C	C	C	C	C	C	C	C	C	C	C	C	T	T	T	T	T	T	T	T	C	C	C	C	C	C
1387144	C	T	Yes					BP1322		two-component sensor histidine kinase (Pseudogene)					prn9	C	C	C	C	C	C	C	C	C	C	C	C	C	C	C	C	C	C	C	C	T	T	T	T	T	T	T	T	C	C	C	C	C	C
1788647	G	A	Yes	D	D	GAC	GAT	BP1704	-	putative membrane protein	complement(1788296..1788919)	1	-	Yes	prn9	G	G	G	G	G	G	G	G	G	G	G	G	G	G	G	G	G	G	G	G	A	A	A	A	A	A	A	A	G	G	G	G	G	G
1968699	G	A	No|intergenic					BP1878P / BP1879P	bvgAP / fhaBP						prn9	G	G	G	G	G	G	G	G	G	G	G	G	G	G	G	G	G	G	G	G	A	A	A	A	A	A	A	A	G	G	G	G	G	G
2284483	C	T	Yes	V	V	GTG	GTA	BP2162	-	putative biotin synthesis protein	complement(2283331..2284767)	1	-	Yes	prn9	C	C	C	C	C	C	C	C	C	C	C	C	C	C	C	C	C	C	C	C	T	T	T	T	T	T	T	T	C	C	C	C	C	C
2700703	G	A	Yes	D	N	GAC	AAC	BP2548	-	two-component system histidine kinase	2700340..2701698	1	+	No	prn9	G	G	G	G	G	G	G	G	G	G	G	G	G	G	G	G	G	G	G	G	A	A	A	A	A	A	A	A	G	G	G	G	G	G
3248011	C	G	No|intergenic					BP3049P							prn9	C	N	N	G	N	G	N	N	G	G	G	G	G	N	G	N	N	N	G	G	A	A	A	N	A	A	A	A	N	G	N	G	G	N
3646971	G	A	No|intergenic					BP3439P	dntP						prn9	G	G	G	G	G	G	G	G	G	G	G	G	G	G	G	G	G	G	G	G	A	A	A	A	A	A	A	A	G	G	G	G	G	G
3837992	G	T	No|intergenic					INTERGENIC							prn9	G	G	G	G	G	G	G	G	G	G	G	G	G	G	G	G	G	G	G	G	T	T	T	T	T	T	T	T	G	G	G	G	G	G
3903493	C	A	yes					BP3694		conserved protein			+		prn9	C	C	C	C	C	C	C	C	C	C	C	C	C	C	C	C	C	C	C	C	A	A	A	A	A	A	A	A	C	C	C	C	C	C
[truncated: 22 more columns]

## Sheet: functional category density
Functional Gategory	No. of SNP	No. of genes	base lenth	SNP density
Phage-related or transposon-related	41	35	33044	0.00124077
Adaptation	3	3	4427	0.00067766
Amino acid biosynthesis	14	14	19343	0.000723776
Cell processes	5	5	5319	0.000940026
Cell surface	81	78	96522	0.000839187
Central/intermediary metabolism	18	18	24603	0.000731618
Cofactor biosynthesis	8	7	7638	0.00104739
Conserved hypothetical	47	42	36267	0.00129594
Energy metabolism	17	16	25533	0.000665805
Fatty acid metabolism	1	1	1230	0.000813008
Macromolecule degradation	3	3	6189	0.000484731
Macromolecule synthesis/modification	30	27	42299	0.000709237
Miscellaneous	41	36	43286	0.000947188
Protection responses	1	1	3180	0.000314465
Pseudogenes	53	45	57332	0.00092444
Regulation	29	28	25461	0.001139
Ribonucleotide biosynthesis	1	1	1593	0.000627746
Small molecule degradation	14	14	17490	0.000800457
Transport/binding proteins	43	36	42045	0.00102271
Unknown	10	10	6410	0.00156006
Virulence-associated genes	33	24	66993	0.000492589
Ribosome constituents	1	1	525	0.00190476
overal chromosaml average	494	445	566729	0.000871669
	493	445	560946	0.000878872
ACV- genes	9	6	16296	0.000552283
